# Supplementary material for: The GNU subunit of PNG kinase, the developmental regulator of mRNA translation, binds BIC-C to localize to RNP granules
Source: eLife journal article supplement (doi:10.7554/elife.67294), 2021-07-12

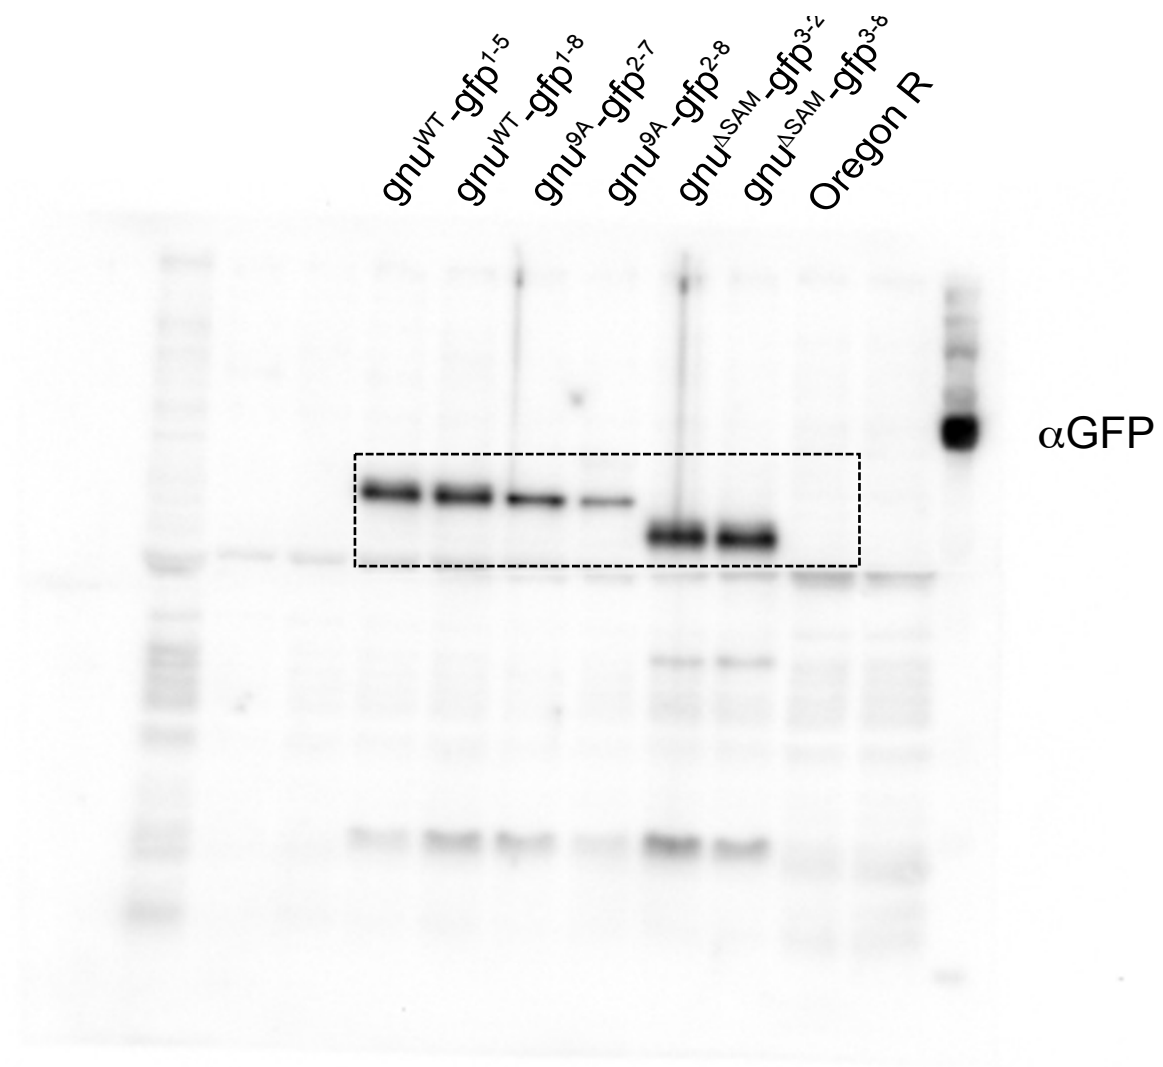

*gnu<sup>WT</sup>-gfp<sup>1-5</sup>*  
*gnu<sup>WT</sup>-gfp<sup>1-8</sup>*  
*gnu<sup>9A</sup>-gfp<sup>2-7</sup>*  
*gnu<sup>9A</sup>-gfp<sup>2-8</sup>*  
*gnu<sup>ΔSAM</sup>-gfp<sup>3-2</sup>*  
*gnu<sup>ΔSAM</sup>-gfp<sup>3-6</sup>*  
Oregon R

$\alpha$ TUB

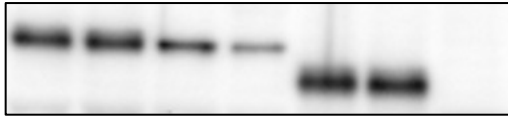

Supplement: fig3-figsupp1-data1 [file elife-67294-fig3-figsupp1-data1-v2.zip]
