# Supplementary material for: The GNU subunit of PNG kinase, the developmental regulator of mRNA translation, binds BIC-C to localize to RNP granules
Source: eLife. 2021 Jul 12;10:e67294. doi: 10.7554/eLife.67294 (PMC8313231; doi:10.7554/eLife.67294)
Supplement: Figure 1—figure supplement 1—source data 1. — Results are shown in Figure 1—figure supplement 1 and supplementary file 1. [file elife-67294-fig1-figsupp1-data1.xlsx]

## Sheet: Raw data
Figure 1-Source Data 1
Total spectrum counts resulting from proteins identified through IP-MS of GNU-WT-GFP and no GFP control shown in Figure 1-Supplement 1.
				Total Spectrum Count
#	Identified Proteins	Accession Number	Molecular Weight	No GFP 1	No GFP 2	No GFP 3	GNU-WT-GFP 1	GNU-WT-GFP 2
1	GFP_AEQVI RecName: Full=Green fluorescent protein	P42212.1	27 kDa	7	0	0	376	319
2	Cluster of giant nuclei [Drosophila melanogaster] (NP_648726.1)	NP_648726.1 [2]	27 kDa	1	0	0	178	179
2.1	giant nuclei [Drosophila melanogaster]	NP_648726.1	27 kDa	1	0	0	178	179
2.2	GNU_9A protein [Drosophila melanogaster]	NP_9000000001	27 kDa	0	0	0	0	143
3	Cluster of ribosomal protein S27A [Drosophila melanogaster] (NP_476778.1)	NP_476778.1 [4]	18 kDa	29	17	30	39	21
3.1	ribosomal protein S27A [Drosophila melanogaster]	NP_476778.1	18 kDa	22	17	24	35	20
3.2	ribosomal protein L40, isoform B [Drosophila melanogaster]	NP_001260018.1	15 kDa	19	8	24	31	8
3.3	Ubiquitin-63E, isoform D [Drosophila melanogaster]	NP_001261383.1 (+1)	86 kDa	0	0	0	0	0
4	Cluster of heat shock protein cognate 4, isoform G [Drosophila melanogaster] (NP_001262586.1)	NP_001262586.1 [2]	71 kDa	9	13	16	29	46
4.1	heat shock protein cognate 4, isoform G [Drosophila melanogaster]	NP_001262586.1	71 kDa	8	13	16	27	46
4.2	heat shock protein cognate 1, isoform A [Drosophila melanogaster]	NP_524063.1	71 kDa	3	3	4	7	8
5	Cluster of actin 5C, isoform E [Drosophila melanogaster] (NP_001284915.1)	NP_001284915.1 [5]	42 kDa	22	28	33	26	21
5.1	actin 5C, isoform E [Drosophila melanogaster]	NP_001284915.1	42 kDa	21	25	32	25	19
5.2	actin 57B [Drosophila melanogaster]	NP_523800.1	42 kDa	18	24	27	19	16
5.3	actin 88F [Drosophila melanogaster]	NP_524367.1	42 kDa	17	24	26	19	15
5.4	actin 79B, isoform B [Drosophila melanogaster]	NP_001262200.1	42 kDa	17	24	20	19	15
5.5	Actin-related protein 53D [Drosophila melanogaster]	NP_477037.2	46 kDa	0	2	0	0	0
6	ENO1_YEAST Enolase 1 - Saccharomyces cerevisiae (Baker's yeast).	P00924.2	47 kDa	2	23	2	8	203
7	ribosomal protein S3, isoform B [Drosophila melanogaster]	NP_001287481.1	27 kDa	9	19	13	14	54
8	heat shock 70-kDa protein cognate 3, isoform E [Drosophila melanogaster]	NP_001285139.1	72 kDa	5	6	9	25	29
9	ribosomal protein S25, isoform B [Drosophila melanogaster]	NP_731544.1	13 kDa	13	12	17	8	17
10	Cluster of twins, isoform I [Drosophila melanogaster] (NP_001287269.1)	NP_001287269.1 [2]	57 kDa	0	0	0	9	39
10.1	twins, isoform I [Drosophila melanogaster]	NP_001287269.1	57 kDa	0	0	0	9	39
10.2	twins, isoform H [Drosophila melanogaster]	NP_731453.1	51 kDa	0	0	0	8	37
11	uncharacterized protein Dmel_CG33308 [Drosophila melanogaster]	NP_995716.2	21 kDa	5	0	0	2	4
12	Cluster of beta-Tubulin at 56D, isoform B [Drosophila melanogaster] (NP_523795.2)	NP_523795.2 [5]	50 kDa	7	18	12	8	33
12.1	beta-Tubulin at 56D, isoform B [Drosophila melanogaster]	NP_523795.2	50 kDa	7	17	12	8	28
12.2	beta-Tubulin at 85D [Drosophila melanogaster]	NP_524290.2	50 kDa	3	7	6	3	13
12.3	beta-Tubulin at 60D, isoform A [Drosophila melanogaster]	NP_523842.2	51 kDa	3	7	3	3	12
12.4	beta-Tubulin at 97EF, isoform B [Drosophila melanogaster]	NP_001163753.1 (+1)	51 kDa	0	0	0	0	0
13	yolk protein 2, isoform B [Drosophila melanogaster]	NP_001285070.1	50 kDa	7	16	28	5	10
14	ribosomal protein L38, isoform B [Drosophila melanogaster]	NP_001260700.1	8 kDa	8	9	18	3	17
15	Cluster of yolk protein 3, isoform B [Drosophila melanogaster] (NP_001285228.1)	NP_001285228.1 [5]	46 kDa	10	13	15	7	8
15.1	yolk protein 3, isoform B [Drosophila melanogaster]	NP_001285228.1	46 kDa	10	13	15	7	8
15.2	uncharacterized protein Dmel_CG34447, isoform B [Drosophila melanogaster]	NP_001259940.1	44 kDa	0	0	0	0	0
15.3	CG5665, isoform C [Drosophila melanogaster]	NP_001246844.1 (+1)	44 kDa	0	0	0	0	0
15.4	CG5162, isoform B [Drosophila melanogaster]	NP_001285367.1	44 kDa	0	0	0	0	0
16	yolk protein 1, isoform B [Drosophila melanogaster]	NP_001285071.1	49 kDa	5	8	18	1	9
17	ribosomal protein L22 [Drosophila melanogaster]	NP_477134.1	31 kDa	5	7	16	4	22
18	poly(A) binding protein, isoform C [Drosophila melanogaster]	NP_725750.1	70 kDa	0	0	1	13	51
19	Cluster of defective chorion 1, isoform G [Drosophila melanogaster] (NP_001245569.1)	NP_001245569.1 [4]	177 kDa	2	0	4	1	2
19.1	defective chorion 1, isoform G [Drosophila melanogaster]	NP_001245569.1 (+1)	177 kDa	2	0	4	1	2
19.2	defective chorion 1, isoform E [Drosophila melanogaster]	NP_001245570.1 (+1)	136 kDa	2	0	4	1	2
20	ribosomal protein L29, isoform D [Drosophila melanogaster]	NP_726054.1	9 kDa	13	6	15	9	6
21	twenty-four, isoform N [Drosophila melanogaster]	NP_001284853.1	200 kDa	0	0	0	6	64
22	Cluster of bicaudal C, isoform B [Drosophila melanogaster] (NP_723948.1)	NP_723948.1 [2]	98 kDa	0	0	0	13	92
22.1	bicaudal C, isoform B [Drosophila melanogaster]	NP_723948.1	98 kDa	0	0	0	13	92
22.2	bicaudal C, isoform D [Drosophila melanogaster]	NP_723949.1	85 kDa	0	0	0	10	83
23	eukaryotic translation initiation factor 4G, isoform B [Drosophila melanogaster]	NP_001096852.1	211 kDa	0	2	0	3	8
24	Cluster of stress-sensitive B, isoform E [Drosophila melanogaster] (NP_001285090.1)	NP_001285090.1 [3]	33 kDa	5	7	9	8	15
24.1	stress-sensitive B, isoform E [Drosophila melanogaster]	NP_001285090.1 (+1)	33 kDa	5	7	9	8	15
24.2	adenine nucleotide translocase 2, isoform C [Drosophila melanogaster]	NP_001259432.1	34 kDa	0	1	2	1	3
25	Cluster of ypsilon schachtel, isoform B [Drosophila melanogaster] (NP_001246730.1)	NP_001246730.1 [2]	37 kDa	0	0	0	11	40
25.1	ypsilon schachtel, isoform B [Drosophila melanogaster]	NP_001246730.1	37 kDa	0	0	0	11	40
25.2	ypsilon schachtel, isoform A [Drosophila melanogaster]	NP_524033.2	38 kDa	0	0	0	11	36
26	Cluster of protein phosphatase 2A at 29B, isoform A [Drosophila melanogaster] (NP_001027227.1)	NP_001027227.1 [3]	65 kDa	0	0	0	4	27
26.1	protein phosphatase 2A at 29B, isoform A [Drosophila melanogaster]	NP_001027227.1	65 kDa	0	0	0	4	27
26.2	protein phosphatase 2A at 29B, isoform D [Drosophila melanogaster]	NP_001245944.1 (+1)	72 kDa	0	0	0	4	26
27	Cluster of elongation factor 1alpha48D, isoform E [Drosophila melanogaster] (NP_001286322.1)	NP_001286322.1 [2]	50 kDa	7	7	12	7	6
27.1	elongation factor 1alpha48D, isoform E [Drosophila melanogaster]	NP_001286322.1	50 kDa	7	7	12	7	6
27.2	elongation factor 1alpha100E, isoform C [Drosophila melanogaster]	NP_996316.1	51 kDa	7	4	9	7	5
28	ribosomal protein L24, isoform C [Drosophila melanogaster]	NP_001285896.1	18 kDa	3	1	1	1	3
29	ribosomal protein L7A, isoform F [Drosophila melanogaster]	NP_001284945.1	31 kDa	1	6	7	3	12
30	Cluster of myosin heavy chain, isoform U [Drosophila melanogaster] (NP_001246051.1)	NP_001246051.1 [6]	223 kDa	15	32	28	1	2
30.1	myosin heavy chain, isoform U [Drosophila melanogaster]	NP_001246051.1	223 kDa	15	32	28	1	2
30.2	myosin heavy chain, isoform O [Drosophila melanogaster]	NP_001162991.1 (+2)	225 kDa	14	30	27	1	2
30.3	myosin heavy chain, isoform F [Drosophila melanogaster]	NP_724003.1	225 kDa	14	30	27	0	2
30.4	myosin heavy chain, isoform P [Drosophila melanogaster]	NP_001162992.1	223 kDa	14	26	26	1	2
31	Cluster of trailer hitch, isoform C [Drosophila melanogaster] (NP_001261770.1)	NP_001261770.1 [4]	70 kDa	1	3	5	7	37
31.1	trailer hitch, isoform C [Drosophila melanogaster]	NP_001261770.1 (+1)	70 kDa	1	3	5	7	37
31.2	trailer hitch, isoform D [Drosophila melanogaster]	NP_001261771.1 (+1)	69 kDa	1	3	5	6	34
32	CG3800, isoform B [Drosophila melanogaster]	NP_001188992.1	18 kDa	6	15	10	3	13
33	Cluster of alpha-Tubulin at 84B [Drosophila melanogaster] (NP_476772.1)	NP_476772.1 [3]	50 kDa	1	8	5	6	18
33.1	alpha-Tubulin at 84B [Drosophila melanogaster]	NP_476772.1 (+1)	50 kDa	1	8	5	6	18
33.2	alpha-Tubulin at 85E [Drosophila melanogaster]	NP_524297.1	50 kDa	1	6	3	4	12
34	ribosomal protein S8, isoform G [Drosophila melanogaster]	NP_001287597.1	24 kDa	5	7	5	6	15
35	fibrillarin [Drosophila melanogaster]	NP_523817.1	35 kDa	0	10	1	1	19
36	ribosomal protein S14b, isoform B [Drosophila melanogaster]	NP_001284995.1	16 kDa	2	4	3	9	21
37	ribosomal protein S27, isoform B [Drosophila melanogaster]	NP_001247301.1	9 kDa	4	5	7	6	18
38	Cluster of heat shock protein 68 [Drosophila melanogaster] (NP_524474.1)	NP_524474.1 [3]	70 kDa	4	0	6	7	8
38.1	heat shock protein 68 [Drosophila melanogaster]	NP_524474.1	70 kDa	4	0	6	7	8
38.2	Heat-shock-protein-70Ab [Drosophila melanogaster]	NP_524798.2	70 kDa	0	0	0	0	0
38.3	Heat-shock-protein-70Ba [Drosophila melanogaster]	NP_731716.1	70 kDa	0	0	0	0	0
39	ribosomal protein S3A, isoform F [Drosophila melanogaster]	NP_001245404.1	30 kDa	3	2	6	6	10
40	ribosomal protein S7, isoform E [Drosophila melanogaster]	NP_733356.2	22 kDa	5	9	4	6	11
41	ribosomal protein S19a, isoform E [Drosophila melanogaster]	NP_001285339.1	17 kDa	7	4	4	2	9
42	heat shock protein 27, isoform B [Drosophila melanogaster]	NP_001287001.1	24 kDa	0	1	3	3	9
43	ribosomal protein S18, isoform B [Drosophila melanogaster]	NP_725943.1	18 kDa	3	2	6	2	6
44	ribosomal protein S23, isoform B [Drosophila melanogaster]	NP_001286410.1	16 kDa	10	5	6	11	7
45	maternal expression at 31B, isoform A [Drosophila melanogaster]	NP_523533.2	52 kDa	0	2	3	3	11
46	ribosomal protein L8, isoform B [Drosophila melanogaster]	NP_728756.1	28 kDa	0	2	3	1	8
47	microtubule star, isoform C [Drosophila melanogaster]	NP_001285725.1	35 kDa	0	0	0	1	10
48	alpha-Tubulin at 67C [Drosophila melanogaster]	NP_524009.2	51 kDa	0	5	3	2	12
49	ribosomal protein L4 [Drosophila melanogaster]	NP_524538.2	45 kDa	0	1	2	1	13
50	Ataxin-2, isoform B [Drosophila melanogaster]	NP_732033.1	118 kDa	0	0	0	6	20
51	Cluster of ribosomal protein S11, isoform C [Drosophila melanogaster] (NP_725114.1)	NP_725114.1 [2]	18 kDa	3	3	1	7	7
51.1	ribosomal protein S11, isoform C [Drosophila melanogaster]	NP_725114.1	18 kDa	3	3	1	7	7
51.2	ribosomal protein S11, isoform B [Drosophila melanogaster]	NP_725115.1	18 kDa	2	3	0	6	7
52	ribosomal protein L10, isoform E [Drosophila melanogaster]	NP_001262233.1	26 kDa	4	3	3	3	11
53	Cluster of glyceraldehyde 3 phosphate dehydrogenase 2, isoform C [Drosophila melanogaster] (NP_001259584.1)	NP_001259584.1 [2]	35 kDa	2	5	6	0	4
53.1	glyceraldehyde 3 phosphate dehydrogenase 2, isoform C [Drosophila melanogaster]	NP_001259584.1	35 kDa	2	5	5	0	4
53.2	glyceraldehyde 3 phosphate dehydrogenase 1, isoform B [Drosophila melanogaster]	NP_001033936.1	35 kDa	2	3	5	0	2
54	heat shock protein cognate 2 [Drosophila melanogaster]	NP_524339.1	70 kDa	3	3	4	7	0
55	thioredoxin peroxidase 1, isoform E [Drosophila melanogaster]	NP_001285204.1	22 kDa	2	4	7	5	8
56	ribosomal protein L27A, isoform D [Drosophila melanogaster]	NP_001285601.1	17 kDa	3	3	2	3	6
57	pyruvate kinase, isoform A [Drosophila melanogaster]	NP_524448.3	57 kDa	0	5	4	1	10
58	ribosomal protein S16, isoform B [Drosophila melanogaster]	NP_001286731.1	17 kDa	1	1	1	6	11
59	ribosomal protein L23A [Drosophila melanogaster]	NP_523886.1	29 kDa	2	1	1	1	6
60	heat shock protein 83, isoform B [Drosophila melanogaster]	NP_001261362.1	82 kDa	2	3	7	2	1
61	ribosomal protein S6, isoform B [Drosophila melanogaster]	NP_511073.1	28 kDa	0	0	0	4	8
62	cup, isoform C [Drosophila melanogaster]	NP_001285687.1	126 kDa	0	1	2	5	20
63	ribosomal protein L28, isoform G [Drosophila melanogaster]	NP_728841.2	16 kDa	2	1	3	3	5
64	ribosomal protein L10Ab, isoform A [Drosophila melanogaster]	NP_648514.1	24 kDa	2	0	1	3	7
65	heat shock protein 26, isoform B [Drosophila melanogaster]	NP_001287000.1	23 kDa	0	1	2	2	8
66	CG2233 [Drosophila melanogaster]	NP_572433.1	47 kDa	0	20	13	0	1
67	glycogen synthase, isoform A [Drosophila melanogaster]	NP_731967.2	82 kDa	3	6	2	2	3
68	ribosomal protein S20 [Drosophila melanogaster]	NP_524421.1	13 kDa	2	7	4	2	7
69	14-3-3zeta, isoform F [Drosophila melanogaster]	NP_724888.2	28 kDa	1	0	2	1	2
70	ribosomal protein L18, isoform C [Drosophila melanogaster]	NP_001286966.1	22 kDa	1	0	1	3	9
71	ribosomal protein L7, isoform B [Drosophila melanogaster]	NP_001285794.1	30 kDa	1	0	1	0	3
72	bellwether [Drosophila melanogaster]	NP_726243.1	59 kDa	0	2	3	1	3
73	Cluster of histone H4 [Drosophila melanogaster] (NP_001027382.1)	NP_001027382.1 [2]	11 kDa	3	3	5	1	5
73.1	histone H4 [Drosophila melanogaster]	NP_001027382.1	11 kDa	3	3	5	1	5
73.2	histone H4 replacement, isoform D [Drosophila melanogaster]	NP_001262576.1	11 kDa	3	3	5	1	5
74	Cluster of ribosomal protein L34b, isoform D [Drosophila melanogaster] (NP_001287250.1)	NP_001287250.1 [2]	18 kDa	0	1	1	1	2
74.1	ribosomal protein L34b, isoform D [Drosophila melanogaster]	NP_001287250.1	18 kDa	0	1	1	1	2
74.2	ribosomal protein L34a, isoform C [Drosophila melanogaster]	NP_001189295.1	18 kDa	0	0	0	0	1
75	tropomyosin 2, isoform G [Drosophila melanogaster]	NP_001287337.1	33 kDa	6	5	6	3	0
76	ribosomal protein L6, isoform B [Drosophila melanogaster]	NP_651876.1	30 kDa	1	0	1	2	2
77	rasputin, isoform G [Drosophila melanogaster]	NP_731830.2	75 kDa	0	0	1	0	15
78	ribosomal protein L13, isoform C [Drosophila melanogaster]	NP_001260312.1	25 kDa	1	0	0	2	5
79	Cluster of papilin, isoform E [Drosophila melanogaster] (NP_788752.2)	NP_788752.2 [2]	313 kDa	2	5	0	0	0
79.1	papilin, isoform E [Drosophila melanogaster]	NP_788752.2	313 kDa	2	5	0	0	0
79.2	papilin, isoform G [Drosophila melanogaster]	NP_001163761.1	307 kDa	2	5	0	0	0
80	ribosomal protein L14 [Drosophila melanogaster]	NP_523975.1	19 kDa	2	2	4	3	6
81	ribosomal protein L37A, isoform C [Drosophila melanogaster]	NP_001188691.1	10 kDa	4	3	4	3	6
82	ribosomal protein S9, isoform E [Drosophila melanogaster]	NP_001287008.1	23 kDa	1	0	0	1	2
83	Ran, isoform D [Drosophila melanogaster]	NP_001285112.1	25 kDa	1	4	8	0	5
84	Chain C, Porcine E-Trypsin	1EPT_C	10 kDa	10	3	2	2	4
85	ribosomal protein S17 [Drosophila melanogaster]	NP_524002.1	15 kDa	2	2	1	2	6
86	ribosomal protein S29, isoform B [Drosophila melanogaster]	NP_731407.2	7 kDa	1	0	3	1	2
87	megalin, isoform E [Drosophila melanogaster]	NP_572563.3-DECOY	?	0	0	2	0	0
88	Cluster of heat shock protein 60A, isoform B [Drosophila melanogaster] (NP_727489.1)	NP_727489.1 [2]	61 kDa	0	0	1	0	0
88.1	heat shock protein 60A, isoform B [Drosophila melanogaster]	NP_727489.1	61 kDa	0	0	1	0	0
88.2	heat shock protein 60C, isoform B [Drosophila melanogaster]	NP_723105.2	62 kDa	0	0	0	0	0
89	ribosomal protein L19, isoform B [Drosophila melanogaster]	NP_995941.1	24 kDa	0	1	3	0	7
90	Cluster of Rab35, isoform D [Drosophila melanogaster] (NP_001259739.1)	NP_001259739.1 [11]	23 kDa	1	0	1	1	0
90.1	Rab35, isoform D [Drosophila melanogaster]	NP_001259739.1	23 kDa	1	0	0	1	0
90.2	Rab10 [Drosophila melanogaster]	NP_523419.1	23 kDa	1	0	0	1	0
90.3	Rab1 [Drosophila melanogaster]	NP_732610.1	23 kDa	1	0	1	1	0
90.4	Rab8, isoform C [Drosophila melanogaster]	NP_001246837.1	24 kDa	0	0	0	1	0
90.5	Rab26, isoform E [Drosophila melanogaster]	NP_001262151.1 (+1)	45 kDa	0	0	0	0	0
90.6	Rab14, isoform B [Drosophila melanogaster]	NP_788056.1 (+1)	27 kDa	0	0	0	0	0
90.7	Rab26, isoform G [Drosophila melanogaster]	NP_001287142.1	43 kDa	0	0	0	0	0
90.8	Rab4, isoform A [Drosophila melanogaster]	NP_725696.1	24 kDa	0	0	0	0	0
90.9	Rab3 [Drosophila melanogaster]	NP_523687.1	25 kDa	0	0	0	0	0
91	belphegor, isoform B [Drosophila melanogaster]	NP_001247135.1	68 kDa	0	0	0	2	14
92	ribosomal protein L26, isoform C [Drosophila melanogaster]	NP_001303372.1	17 kDa	0	0	2	2	1
93	ribosomal protein L12, isoform C [Drosophila melanogaster]	NP_726413.1	18 kDa	4	5	3	2	6
94	ribosomal protein L27, isoform D [Drosophila melanogaster]	NP_001262968.1	16 kDa	1	0	2	1	4
95	ribosomal protein L18A [Drosophila melanogaster]	NP_523774.1	21 kDa	1	0	0	1	2
96	abnormal spindle [Drosophila melanogaster]	NP_524488.3	230 kDa	0	0	2	2	3
97	Cluster of tropomyosin 1, isoform O [Drosophila melanogaster] (NP_732001.3)	NP_732001.3 [4]	33 kDa	6	5	6	1	0
97.1	tropomyosin 1, isoform O [Drosophila melanogaster]	NP_732001.3	33 kDa	6	5	6	1	0
97.2	tropomyosin 1, isoform E [Drosophila melanogaster]	NP_732006.2	80 kDa	5	3	5	1	0
97.3	tropomyosin 1, isoform H [Drosophila melanogaster]	NP_732007.2	75 kDa	3	0	4	1	0
97.4	tropomyosin 1, isoform R [Drosophila melanogaster]	NP_001262590.1	29 kDa	2	2	2	0	0
98	ribosomal protein S10b, isoform E [Drosophila melanogaster]	NP_001285445.1	18 kDa	1	3	6	0	2
99	ribosomal protein L3, isoform H [Drosophila melanogaster]	NP_731548.2	47 kDa	0	1	0	0	2
100	14-3-3epsilon, isoform A [Drosophila melanogaster]	NP_732309.1 (+3)	30 kDa	1	0	2	1	1
101	ubiquitin activating enzyme 5 [Drosophila melanogaster]	NP_572722.2	44 kDa	1	6	2	0	5
102	ribosomal protein L15, isoform I [Drosophila melanogaster]	NP_001245398.1	24 kDa	0	1	1	0	2
103	eukaryotic initiation factor 4E, isoform I [Drosophila melanogaster]	NP_001261627.1	29 kDa	0	1	0	1	7
104	ribosomal protein S5b, isoform A [Drosophila melanogaster]	NP_650407.1	26 kDa	2	3	2	1	4
105	ribosomal protein S13, isoform C [Drosophila melanogaster]	NP_001285747.1	17 kDa	2	1	2	0	6
106	ribosomal protein L23 [Drosophila melanogaster]	NP_523813.1	15 kDa	2	1	0	0	7
107	CG5726 [Drosophila melanogaster]	NP_611304.1	87 kDa	0	0	0	0	6
108	dynein heavy chain 64C, isoform E [Drosophila melanogaster]	NP_001261428.1 (+1)	531 kDa	0	0	0	0	0
109	Cluster of jabba, isoform C [Drosophila melanogaster] (NP_001137703.1)	NP_001137703.1 [2]	63 kDa	0	1	0	1	5
109.1	jabba, isoform C [Drosophila melanogaster]	NP_001137703.1	63 kDa	0	1	0	1	5
109.2	jabba, isoform I [Drosophila melanogaster]	NP_001261076.1	46 kDa	0	1	0	1	4
110	Tcp1-like, isoform B [Drosophila melanogaster]	NP_732748.1	60 kDa	0	0	0	3	6
111	ribosomal protein L36A, isoform B [Drosophila melanogaster]	NP_001285737.1	13 kDa	0	2	0	1	1
112	Cluster of ATP synthase, beta subunit, isoform D [Drosophila melanogaster] (NP_001284719.1)	NP_001284719.1 [2]	54 kDa	2	1	5	0	1
112.1	ATP synthase, beta subunit, isoform D [Drosophila melanogaster]	NP_001284719.1	54 kDa	2	1	5	0	1
112.2	ATP synthase, beta subunit-like [Drosophila melanogaster]	NP_648836.2	68 kDa	0	0	1	0	0
113	Cluster of G protein alpha s subunit, isoform D [Drosophila melanogaster] (NP_001163283.1)	NP_001163283.1 [5]	45 kDa	1	0	0	0	0
113.1	G protein alpha s subunit, isoform D [Drosophila melanogaster]	NP_001163283.1 (+1)	45 kDa	0	0	0	0	0
113.2	G protein alpha o subunit, isoform H [Drosophila melanogaster]	NP_995802.1	41 kDa	1	0	0	0	0
113.3	G protein alpha i subunit [Drosophila melanogaster]	NP_477502.1	41 kDa	1	0	0	0	0
113.4	concertina, isoform B [Drosophila melanogaster]	NP_001260696.1	53 kDa	0	0	0	0	0
114	elongation factor 2, isoform C [Drosophila melanogaster]	NP_724358.2	94 kDa	1	0	6	1	0
115	megator, isoform B [Drosophila melanogaster]	NP_001260903.1	262 kDa	0	0	0	2	2
116	Cluster of ribosomal protein L13A, isoform B [Drosophila melanogaster] (NP_649560.1)	NP_649560.1 [2]	24 kDa	0	0	0	0	0
116.1	ribosomal protein L13A, isoform B [Drosophila melanogaster]	NP_649560.1	24 kDa	0	0	0	0	0
116.2	ribosomal protein L13A, isoform C [Drosophila melanogaster]	NP_001262291.1	11 kDa	0	0	0	0	0
117	zipper, isoform D [Drosophila melanogaster]	NP_001014552.1 (+5)	232 kDa	0	0	0	2	0
118	ribosomal protein S26, isoform E [Drosophila melanogaster]	NP_001286042.1	13 kDa	1	1	1	1	6
119	Cluster of Fmr1, isoform G [Drosophila melanogaster] (NP_001247017.1)	NP_001247017.1 [2]	81 kDa	0	0	0	0	6
119.1	Fmr1, isoform G [Drosophila melanogaster]	NP_001247017.1	81 kDa	0	0	0	0	6
119.2	Fmr1, isoform H [Drosophila melanogaster]	NP_001262447.1	65 kDa	0	0	0	0	3
120	CG4586 [Drosophila melanogaster]	NP_572371.1	77 kDa	0	0	0	2	9
121	cysteine proteinase-1, isoform C [Drosophila melanogaster]	NP_523735.2	42 kDa	0	5	2	0	5
122	ribosomal protein S2, isoform C [Drosophila melanogaster]	NP_001285785.1	29 kDa	0	3	3	0	7
123	Rab11, isoform A [Drosophila melanogaster]	NP_599137.1	24 kDa	1	0	1	0	0
124	ribosomal protein L30, isoform E [Drosophila melanogaster]	NP_001260550.2	12 kDa	1	1	2	1	4
125	histone H2B [Drosophila melanogaster]	NP_001027385.1	14 kDa	1	0	3	1	3
126	ribosomal protein L32, isoform C [Drosophila melanogaster]	NP_733339.1	17 kDa	0	2	2	0	3
127	chorion protein 36 [Drosophila melanogaster]	NP_511087.1	30 kDa	1	0	3	1	1
128	yellow-g [Drosophila melanogaster]	NP_523888.1	43 kDa	0	0	0	0	0
129	uncharacterized protein Dmel_CG17018, isoform C [Drosophila melanogaster]	NP_724393.2	146 kDa	0	0	0	3	3
130	ribosomal protein S4, isoform C [Drosophila melanogaster]	NP_001287055.1	29 kDa	1	1	2	1	2
131	ribosomal protein L11, isoform B [Drosophila melanogaster]	NP_001286614.1	21 kDa	1	3	2	0	5
132	casein kappa [Bos taurus]	NP_776719.1	21 kDa	1	0	2	0	0
133	rudimentary, isoform E [Drosophila melanogaster]	NP_996488.2	247 kDa	0	4	0	0	3
134	heterogeneous nuclear ribonucleoprotein at 27C, isoform H [Drosophila melanogaster]	NP_001245919.1	45 kDa	0	0	1	0	11
135	DnaJ-like-2, isoform E [Drosophila melanogaster]	NP_731807.1	45 kDa	0	1	2	0	3
136	Cluster of eukaryotic initiation factor 4a, isoform F [Drosophila melanogaster] (NP_001260117.1)	NP_001260117.1 [2]	46 kDa	1	1	3	0	2
136.1	eukaryotic initiation factor 4a, isoform F [Drosophila melanogaster]	NP_001260117.1	46 kDa	1	1	3	0	2
136.2	eIF4AIII [Drosophila melanogaster]	NP_649788.2	46 kDa	0	0	3	0	1
137	Cluster of Glutamyl-prolyl-tRNA synthetase, isoform A [Drosophila melanogaster] (NP_524471.2)	NP_524471.2 [2]	189 kDa	0	0	0	0	3
137.1	Glutamyl-prolyl-tRNA synthetase, isoform A [Drosophila melanogaster]	NP_524471.2	189 kDa	0	0	0	0	3
137.2	Glutamyl-prolyl-tRNA synthetase, isoform B [Drosophila melanogaster]	NP_732925.1	108 kDa	0	0	0	0	2
138	Cluster of sterol carrier protein X-related thiolase [Drosophila melanogaster] (NP_524715.2)	NP_524715.2 [2]	59 kDa	0	0	0	2	2
138.1	sterol carrier protein X-related thiolase [Drosophila melanogaster]	NP_524715.2	59 kDa	0	0	0	2	2
138.2	uncharacterized protein Dmel_CG17597, isoform B [Drosophila melanogaster]	NP_001286066.1	44 kDa	0	0	0	0	0
139	IGF-II mRNA-binding protein, isoform K [Drosophila melanogaster]	NP_001036268.2 (+1)	69 kDa	0	0	0	1	4
140	uncharacterized protein Dmel_CG17754, isoform G [Drosophila melanogaster]	NP_001285047.1 (+1)	72 kDa	1	6	2	0	1
141	malic enzyme, isoform B [Drosophila melanogaster]	NP_524880.2 (+1)	85 kDa	0	0	0	0	0
142	uncharacterized protein Dmel_CG12262 [Drosophila melanogaster]	NP_648149.1	46 kDa	0	0	1	0	1
143	lost [Drosophila melanogaster]	NP_649466.1	60 kDa	0	0	0	0	1
144	ribosomal protein L21, isoform C [Drosophila melanogaster]	NP_001286133.1	18 kDa	0	0	0	0	3
145	Cluster of wing blister, isoform G [Drosophila melanogaster] (NP_476790.3-DECOY)	NP_476790.3-DECOY [2]	?	0	0	1	0	0
145.1	wing blister, isoform G [Drosophila melanogaster]	NP_476790.3-DECOY	?	0	0	1	0	0
145.2	wing blister, isoform F [Drosophila melanogaster]	NP_001188809.1-DECOY	?	0	0	0	0	0
146	GTPase activating protein and centrosome-associated, isoform B [Drosophila melanogaster]	NP_001097549.1	133 kDa	0	0	0	1	5
147	alpha spectrin, isoform B [Drosophila melanogaster]	NP_001261286.1 (+3)	283 kDa	0	0	0	0	0
148	ribosomal protein L17, isoform E [Drosophila melanogaster]	NP_001284961.1	22 kDa	0	0	0	0	1
149	ribosomal protein S5a, isoform D [Drosophila melanogaster]	NP_001285362.1	25 kDa	0	1	2	0	4
150	Cluster of adenosylhomocysteinase like 1 [Drosophila melanogaster] (NP_647746.1)	NP_647746.1 [2]	57 kDa	0	0	0	0	0
150.1	adenosylhomocysteinase like 1 [Drosophila melanogaster]	NP_647746.1	57 kDa	0	0	0	0	0
150.2	adenosylhomocysteinase like 2, isoform D [Drosophila melanogaster]	NP_996221.1	55 kDa	0	0	0	0	0
151	TER94, isoform E [Drosophila melanogaster]	NP_001286261.1	92 kDa	0	0	0	0	0
152	mitochondrial trifunctional protein alpha subunit, isoform A [Drosophila melanogaster]	NP_609299.1	84 kDa	0	0	1	1	2
153	glycoprotein 93 [Drosophila melanogaster]	NP_651601.1	90 kDa	0	0	0	0	0
154	Cluster of lipophorin receptor 1, isoform K [Drosophila melanogaster] (NP_001097934.2)	NP_001097934.2 [4]	119 kDa	1	0	0	0	0
154.1	lipophorin receptor 1, isoform K [Drosophila melanogaster]	NP_001097934.2	119 kDa	1	0	0	0	0
154.2	lipophorin receptor 1, isoform S [Drosophila melanogaster]	NP_001097931.3 (+2)	99 kDa	0	0	0	0	0
155	heat shock protein cognate 5, isoform B [Drosophila melanogaster]	NP_001286414.1	74 kDa	0	0	1	0	0
156	non-claret disjunctional, isoform B [Drosophila melanogaster]	NP_001287592.1	77 kDa	0	0	0	0	5
157	regulatory particle triple-A ATPase 6 [Drosophila melanogaster]	NP_608447.1	46 kDa	0	0	1	0	2
158	ribosomal protein L9, isoform C [Drosophila melanogaster]	NP_001285826.1	21 kDa	0	0	1	1	3
159	Rab7, isoform C [Drosophila melanogaster]	NP_001247277.1	23 kDa	0	0	0	0	0
160	chorion protein b at 7F, isoform A [Drosophila melanogaster]	NP_572484.1	56 kDa	2	1	1	0	0
161	Gamma-interferon-inducible lysosomal thiol reductase 1 [Drosophila melanogaster]	NP_650287.3	28 kDa	0	1	0	1	1
162	lethal (1) G0156, isoform C [Drosophila melanogaster]	NP_728257.2	39 kDa	0	1	1	0	2
163	Lon protease, isoform C [Drosophila melanogaster]	NP_730435.2	115 kDa	0	0	0	0	5
164	clathrin heavy chain, isoform G [Drosophila melanogaster]	NP_001285300.1	191 kDa	0	0	0	0	0
165	deadhead, isoform B [Drosophila melanogaster]	NP_001284882.1	12 kDa	0	0	2	1	0
166	spindle assembly abnormal 4 [Drosophila melanogaster]	NP_649701.2	103 kDa	0	0	0	0	5
167	Cluster of G protein alpha q subunit, isoform D [Drosophila melanogaster] (NP_725196.1)	NP_725196.1 [3]	41 kDa	0	0	0	0	0
167.1	G protein alpha q subunit, isoform D [Drosophila melanogaster]	NP_725196.1	41 kDa	0	0	0	0	0
167.2	uncharacterized protein Dmel_CG30054, isoform E [Drosophila melanogaster]	NP_001036538.3	41 kDa	0	0	0	0	0
167.3	uncharacterized protein Dmel_CG30054, isoform F [Drosophila melanogaster]	NP_001188914.1	38 kDa	0	0	0	0	0
168	chorion protein a at 7F [Drosophila melanogaster]	NP_001033837.1	32 kDa	0	0	0	0	0
169	uncharacterized protein Dmel_CG15293, isoform C [Drosophila melanogaster]	NP_001285925.1	37 kDa	0	6	2	0	1
170	belle, isoform B [Drosophila melanogaster]	NP_001262379.1 (+1)	85 kDa	0	0	0	0	0
171	beta spectrin, isoform A [Drosophila melanogaster]	NP_523388.1	266 kDa	0	0	0	0	0
172	ribosomal protein L35A [Drosophila melanogaster]	NP_649539.1	18 kDa	0	0	1	0	1
173	yellow-g2 [Drosophila melanogaster]	NP_647710.1	43 kDa	0	0	0	0	0
174	ribosomal protein L36, isoform E [Drosophila melanogaster]	NP_001284750.1	14 kDa	0	0	1	0	0
175	succinate dehydrogenase, subunit A (flavoprotein), isoform C [Drosophila melanogaster]	NP_725882.1	72 kDa	0	0	0	0	0
176	Cluster of Rab6, isoform B [Drosophila melanogaster] (NP_001285869.1)	NP_001285869.1 [2]	23 kDa	0	0	0	0	0
176.1	Rab6, isoform B [Drosophila melanogaster]	NP_001285869.1	23 kDa	0	0	0	0	0
176.2	Rab39, isoform B [Drosophila melanogaster]	NP_001245568.1	25 kDa	0	0	0	0	0
177	chorion protein 18 [Drosophila melanogaster]	NP_523978.1	17 kDa	0	0	0	0	2
178	uncharacterized protein Dmel_CG30069 [Drosophila melanogaster]	NP_610937.4	461 kDa	0	0	0	0	0
179	Rab5, isoform I [Drosophila melanogaster]	NP_001259927.1	24 kDa	1	0	1	1	0
180	IGH1M_MOUSE RecName: Full=Ig gamma-1 chain C region, membrane-bound form	P01869.2	43 kDa	0	6	0	0	1
181	La related protein, isoform H [Drosophila melanogaster]	NP_001247348.1	178 kDa	0	0	0	0	4
182	chorion protein 19 [Drosophila melanogaster]	NP_523980.1	19 kDa	0	0	0	0	0
183	swallow [Drosophila melanogaster]	NP_511060.2	62 kDa	0	0	0	3	0
184	wispy, isoform B [Drosophila melanogaster]	NP_001285143.1 (+1)	151 kDa	0	0	0	1	2
185	Sarco/endoplasmic reticulum Ca(2+)-ATPase, isoform A [Drosophila melanogaster]	NP_476832.1	110 kDa	0	0	0	0	0
186	ribosomal protein L31, isoform C [Drosophila melanogaster]	NP_724805.1	15 kDa	1	0	1	1	2
187	argonaute 2, isoform B [Drosophila melanogaster]	NP_648775.1 (+1)	137 kDa	0	0	0	2	1
188	secreted Wg-interacting molecule, isoform B [Drosophila melanogaster]	NP_611652.2	49 kDa	2	2	0	0	0
189	Isoleucyl-tRNA synthetase, isoform D [Drosophila melanogaster]	NP_788565.1	141 kDa	0	0	0	1	4
190	Rap1 GTPase, isoform C [Drosophila melanogaster]	NP_001261295.1	21 kDa	0	0	0	0	0
191	CG8507 [Drosophila melanogaster]	NP_649950.1	45 kDa	2	0	0	0	2
192	Rab2, isoform B [Drosophila melanogaster]	NP_001260732.1	24 kDa	0	0	0	0	0
193	cyclophilin 1 [Drosophila melanogaster]	NP_523366.2	25 kDa	0	0	3	0	0
194	prophenoloxidase 2 [Drosophila melanogaster]	NP_610443.1	79 kDa	0	1	0	0	1
195	transforming acidic coiled-coil protein, isoform N [Drosophila melanogaster]	NP_001262262.1	137 kDa	0	0	0	2	0
196	sister of feo, isoform B [Drosophila melanogaster]	NP_001285092.1	71 kDa	0	0	0	0	0
197	vitelline membrane 26Aa, isoform B [Drosophila melanogaster]	NP_001260115.1	14 kDa	0	3	1	0	1
198	Cluster of wings up A, isoform A [Drosophila melanogaster] (NP_728141.1)	NP_728141.1 [3]	24 kDa	0	1	2	0	0
198.1	wings up A, isoform A [Drosophila melanogaster]	NP_728141.1	24 kDa	0	1	2	0	0
198.2	wings up A, isoform F [Drosophila melanogaster]	NP_728137.1 (+1)	25 kDa	0	0	0	0	0
199	transferrin 1, isoform C [Drosophila melanogaster]	NP_001285404.1	72 kDa	1	0	0	0	0
200	chorion protein 15 [Drosophila melanogaster]	NP_523979.1	12 kDa	0	0	0	0	0
201	cctgamma, isoform D [Drosophila melanogaster]	NP_001189237.1	59 kDa	0	0	1	0	0
202	ribosomal protein S24 [Drosophila melanogaster]	NP_611693.1	15 kDa	0	0	0	0	3
203	gamma-Tubulin at 37C, isoform B [Drosophila melanogaster]	NP_001260565.1	51 kDa	0	0	0	0	2
204	female-specific independent of transformer [Drosophila melanogaster]	NP_650993.1	14 kDa	0	1	2	0	1
205	CG4447 [Drosophila melanogaster]	NP_648302.2	28 kDa	0	0	0	0	0
206	T-cp1zeta [Drosophila melanogaster]	NP_573066.1	58 kDa	0	0	0	0	1
207	CG8036, isoform D [Drosophila melanogaster]	NP_731264.1	63 kDa	0	0	1	0	0
208	twinstar [Drosophila melanogaster]	NP_477034.1	17 kDa	0	0	1	0	0
209	peroxin 14 [Drosophila melanogaster]	NP_649253.1	31 kDa	0	0	0	0	2
210	regulatory particle triple-A ATPase 1 [Drosophila melanogaster]	NP_477473.1	49 kDa	0	0	0	0	0
211	uncharacterized protein Dmel_CG33923 [Drosophila melanogaster]	NP_001027216.2	21 kDa	2	0	0	0	0
212	Cluster of vacuolar H[+] ATPase 68 kDa subunit 2, isoform F [Drosophila melanogaster] (NP_001260425.1)	NP_001260425.1 [2]	68 kDa	0	0	0	0	0
212.1	vacuolar H[+] ATPase 68 kDa subunit 2, isoform F [Drosophila melanogaster]	NP_001260425.1	68 kDa	0	0	0	0	0
212.2	vacuolar H[+] ATPase 68kD subunit 3 [Drosophila melanogaster]	NP_609595.1	82 kDa	0	0	0	0	0
213	Cluster of troponin C at 73F, isoform C [Drosophila melanogaster] (NP_001287091.1)	NP_001287091.1 [2]	18 kDa	4	0	0	1	0
213.1	troponin C at 73F, isoform C [Drosophila melanogaster]	NP_001287091.1	18 kDa	4	0	0	1	0
213.2	troponin C at 47D, isoform B [Drosophila melanogaster]	NP_001286310.1	18 kDa	1	0	0	0	0
214	chorion protein 38, isoform B [Drosophila melanogaster]	NP_001162703.1	30 kDa	0	0	0	0	0
215	roadkill, isoform C [Drosophila melanogaster]	NP_650325.1 (+2)	45 kDa	0	0	0	1	2
216	ADP ribosylation factor at 102F, isoform B [Drosophila melanogaster]	NP_001259087.1	21 kDa	0	0	0	1	0
217	Rho1, isoform F [Drosophila melanogaster]	NP_995850.1	22 kDa	0	0	0	0	0
218	Grip71 [Drosophila melanogaster]	NP_609902.3	72 kDa	0	0	0	0	2
219	elongation factor 1 beta, isoform C [Drosophila melanogaster]	NP_001286506.1	24 kDa	1	0	2	0	0
220	Aspartyl-tRNA synthetase, isoform B [Drosophila melanogaster]	NP_001260931.1	59 kDa	0	0	0	0	2
221	IGHG_RABIT RecName: Full=Ig gamma chain C region	P01870.1	35 kDa	0	0	0	0	0
222	Rho guanine nucleotide exchange factor at 64C, isoform B [Drosophila melanogaster]	NP_001261425.1	215 kDa	2	0	0	0	0
223	uncharacterized protein Dmel_CG13084 [Drosophila melanogaster]	NP_609971.1	51 kDa	0	0	0	0	0
224	bonus, isoform B [Drosophila melanogaster]	NP_001163665.1	121 kDa	0	0	0	0	1
225	uncharacterized protein Dmel_CG15735 [Drosophila melanogaster]	NP_572777.2	24 kDa	0	0	0	1	1
226	uncharacterized protein Dmel_CG13364 [Drosophila melanogaster]	NP_652500.1	7 kDa	1	0	1	0	0
227	Cluster of Rac1, isoform B [Drosophila melanogaster] (NP_001261247.1)	NP_001261247.1 [2]	21 kDa	0	0	0	0	0
227.1	Rac1, isoform B [Drosophila melanogaster]	NP_001261247.1	21 kDa	0	0	0	0	0
227.2	Rac2, isoform B [Drosophila melanogaster]	NP_001261517.1	21 kDa	0	0	0	0	0
228	Lysyl-tRNA synthetase, isoform C [Drosophila melanogaster]	NP_001188571.1 (+1)	69 kDa	0	0	0	0	2
229	uncharacterized protein Dmel_CG11876, isoform A [Drosophila melanogaster]	NP_733265.1	39 kDa	0	0	0	0	0
230	CG7637 [Drosophila melanogaster]	NP_610610.1	8 kDa	2	0	0	0	0
231	atilla, isoform C [Drosophila melanogaster]	NP_001260408.1	15 kDa	0	0	0	0	0
232	THIO_ECOLI RecName: Full=Thioredoxin-1; Short=Trx-1	P0AA25.2	12 kDa	1	0	0	0	0
233	Pi4KIIalpha, isoform B [Drosophila melanogaster]	NP_730945.1 (+1)	63 kDa	0	0	0	0	0
234	CG8258 [Drosophila melanogaster]	NP_610418.1	59 kDa	0	0	2	0	0
235	CG5525 [Drosophila melanogaster]	NP_609579.1	57 kDa	0	0	0	0	0
236	uncharacterized protein Dmel_CG11381 [Drosophila melanogaster]	NP_569894.2	50 kDa	0	0	0	0	0

## Sheet: Fold enrichment ranking
Figure 1-Source Data for Figure 1 Supplement 1 and Supplemental Table 1
Ranked list of all proteins plotted in Figure 1-Supplement 1. MS data from pull-downs was analysed by label-free quantification using Scaffold v4. Ranking is based on fold enrichment of proteins in GNU-WT-GFP Ips over no GFP control Ips.
Protein	Rank	log(fold Change) (GNUWT-GFP/ noGFP)
Cluster of bicaudal C, isoform B [Drosophila melanogaster] (NP_723948.1)	1	23.17
Cluster of twins, isoform I [Drosophila melanogaster] (NP_001287269.1)	2	22.3
Cluster of ypsilon schachtel, isoform B [Drosophila melanogaster] (NP_001246730.1)	3	21.58
ribosomal protein S6, isoform B [Drosophila melanogaster]	4	21.13
twenty-four, isoform N [Drosophila melanogaster]	5	21.09
Ataxin-2, isoform B [Drosophila melanogaster]	6	21.07
Cluster of protein phosphatase 2A at 29B, isoform A [Drosophila melanogaster] (NP_001027227.1)	7	20.96
ribosomal protein L21, isoform C [Drosophila melanogaster]	8	20.72
IGF-II mRNA-binding protein, isoform K [Drosophila melanogaster]	9	20.67
uncharacterized protein Dmel_CG15735 [Drosophila melanogaster]	10	20.52
CG5726 [Drosophila melanogaster]	11	20.34
microtubule star, isoform C [Drosophila melanogaster]	12	20.33
belphegor, isoform B [Drosophila melanogaster]	13	20.33
Tcp1-like, isoform B [Drosophila melanogaster]	14	20.14
roadkill, isoform C [Drosophila melanogaster]	15	19.98
GTPase activating protein and centrosome-associated, isoform B [Drosophila melanogaster]	16	19.97
Cluster of sterol carrier protein X-related thiolase [Drosophila melanogaster] (NP_524715.2)	17	19.89
Cluster of Fmr1, isoform G [Drosophila melanogaster] (NP_001247017.1)	18	19.88
Aspartyl-tRNA synthetase, isoform B [Drosophila melanogaster]	19	19.85
CG4586 [Drosophila melanogaster]	20	19.65
non-claret disjunctional, isoform B [Drosophila melanogaster]	21	19.56
peroxin 14 [Drosophila melanogaster]	22	19.48
T-cp1zeta [Drosophila melanogaster]	23	19.34
Cluster of Glutamyl-prolyl-tRNA synthetase, isoform A [Drosophila melanogaster] (NP_524471.2)	24	19.24
ribosomal protein S24 [Drosophila melanogaster]	25	19.22
ribosomal protein L17, isoform E [Drosophila melanogaster]	26	19.22
uncharacterized protein Dmel_CG17018, isoform C [Drosophila melanogaster]	27	19.18
Lon protease, isoform C [Drosophila melanogaster]	28	19.11
La related protein, isoform H [Drosophila melanogaster]	29	18.95
spindle assembly abnormal 4 [Drosophila melanogaster]	30	18.92
Isoleucyl-tRNA synthetase, isoform D [Drosophila melanogaster]	31	18.77
swallow [Drosophila melanogaster]	32	18.69
megator, isoform B [Drosophila melanogaster]	33	18.49
gamma-Tubulin at 37C, isoform B [Drosophila melanogaster]	34	18.37
lost [Drosophila melanogaster]	35	18.3
Lysyl-tRNA synthetase, isoform C [Drosophila melanogaster]	36	18.27
wispy, isoform B [Drosophila melanogaster]	37	18.23
transforming acidic coiled-coil protein, isoform N [Drosophila melanogaster]	38	17.79
Grip71 [Drosophila melanogaster]	39	17.62
chorion protein 18 [Drosophila melanogaster]	40	17.55
bonus, isoform B [Drosophila melanogaster]	41	17.52
argonaute 2, isoform B [Drosophila melanogaster]	42	17.5
zipper, isoform D [Drosophila melanogaster]	43	17.26
ADP ribosylation factor at 102F, isoform B [Drosophila melanogaster]	44	16.6
Cluster of giant nuclei [Drosophila melanogaster] (NP_648726.1)	45	7.16
rasputin, isoform G [Drosophila melanogaster]	46	3.19
ribosomal protein L3, isoform H [Drosophila melanogaster]	47	2.9
ribosomal protein L19, isoform B [Drosophila melanogaster]	48	2.79
heat shock protein 26, isoform B [Drosophila melanogaster]	49	1.9
poly(A) binding protein, isoform C [Drosophila melanogaster]	50	1.86
ribosomal protein L7, isoform B [Drosophila melanogaster]	51	1.63
heterogeneous nuclear ribonucleoprotein at 27C, isoform H [Drosophila melanogaster]	52	1.61
ribosomal protein L28, isoform G [Drosophila melanogaster]	53	1.58
eukaryotic initiation factor 4E, isoform I [Drosophila melanogaster]	54	1.54
Cluster of ribosomal protein S11, isoform C [Drosophila melanogaster] (NP_725114.1)	55	1.5
Cluster of heat shock protein 68 [Drosophila melanogaster] (NP_524474.1)	56	1.49
ribosomal protein S3, isoform B [Drosophila melanogaster]	57	1.47
ribosomal protein L22 [Drosophila melanogaster]	58	1.46
Cluster of jabba, isoform C [Drosophila melanogaster] (NP_001137703.1)	59	1.44
ribosomal protein L10, isoform E [Drosophila melanogaster]	60	1.37
heat shock protein 27, isoform B [Drosophila melanogaster]	61	1.36
maternal expression at 31B, isoform A [Drosophila melanogaster]	62	1.33
14-3-3epsilon, isoform A [Drosophila melanogaster]	63	1.32
ribosomal protein L15, isoform I [Drosophila melanogaster]	64	1.31
ribosomal protein L18, isoform C [Drosophila melanogaster]	65	1.31
14-3-3zeta, isoform F [Drosophila melanogaster]	66	1.3
ribosomal protein L24, isoform C [Drosophila melanogaster]	67	1.23
ribosomal protein L30, isoform E [Drosophila melanogaster]	68	1.23
Cluster of trailer hitch, isoform C [Drosophila melanogaster] (NP_001261770.1)	69	1.23
ribosomal protein L23A [Drosophila melanogaster]	70	1.07
ribosomal protein S2, isoform C [Drosophila melanogaster]	71	1.04
ribosomal protein S7, isoform E [Drosophila melanogaster]	72	1.02
Cluster of heat shock protein cognate 4, isoform G [Drosophila melanogaster] (NP_001262586.1)	73	1.02
heat shock protein cognate 4, isoform G [Drosophila melanogaster]	74	0.98
heat shock protein cognate 1, isoform A [Drosophila melanogaster]	75	0.63
ribosomal protein L10Ab, isoform A [Drosophila melanogaster]	76	0.92
prophenoloxidase 2 [Drosophila melanogaster]	77	0.9
ribosomal protein L7A, isoform F [Drosophila melanogaster]	78	0.88
ribosomal protein S26, isoform E [Drosophila melanogaster]	79	0.86
ribosomal protein L14 [Drosophila melanogaster]	80	0.85
ribosomal protein S23, isoform B [Drosophila melanogaster]	81	0.83
alpha-Tubulin at 67C [Drosophila melanogaster]	82	0.83
ribosomal protein L38, isoform B [Drosophila melanogaster]	83	0.75
ribosomal protein S10b, isoform E [Drosophila melanogaster]	84	0.74
ribosomal protein S27, isoform B [Drosophila melanogaster]	85	0.73
heat shock protein cognate 2 [Drosophila melanogaster]	86	0.71
ribosomal protein S25, isoform B [Drosophila melanogaster]	87	0.71
ribosomal protein L27A, isoform D [Drosophila melanogaster]	88	0.68
ribosomal protein L4 [Drosophila melanogaster]	89	0.64
ribosomal protein S8, isoform G [Drosophila melanogaster]	90	0.6
ribosomal protein S18, isoform B [Drosophila melanogaster]	91	0.59
ribosomal protein L18A [Drosophila melanogaster]	92	0.59
ribosomal protein L6, isoform B [Drosophila melanogaster]	93	0.53
vitelline membrane 26Aa, isoform B [Drosophila melanogaster]	94	0.5
heat shock 70-kDa protein cognate 3, isoform E [Drosophila melanogaster]	95	0.49
Cluster of stress-sensitive B, isoform E [Drosophila melanogaster] (NP_001285090.1)	96	0.48
Cluster of alpha-Tubulin at 84B [Drosophila melanogaster] (NP_476772.1)	97	0.46
ribosomal protein L11, isoform B [Drosophila melanogaster]	98	0.44
pyruvate kinase, isoform A [Drosophila melanogaster]	99	0.34
Cluster of beta-Tubulin at 56D, isoform B [Drosophila melanogaster] (NP_523795.2)	100	0.33
ribosomal protein L8, isoform B [Drosophila melanogaster]	101	0.33
ribosomal protein L9, isoform C [Drosophila melanogaster]	102	0.32
ribosomal protein L23 [Drosophila melanogaster]	103	0.31
CG3800, isoform B [Drosophila melanogaster]	104	0.3
ribosomal protein S17 [Drosophila melanogaster]	105	0.28
ribosomal protein S14b, isoform B [Drosophila melanogaster]	106	0.22
ribosomal protein S5a, isoform D [Drosophila melanogaster]	107	0.17
ribosomal protein S13, isoform C [Drosophila melanogaster]	108	0.15
ribosomal protein L32, isoform C [Drosophila melanogaster]	109	0.15
ribosomal protein L31, isoform C [Drosophila melanogaster]	110	0.14
Cluster of ribosomal protein L34b, isoform D [Drosophila melanogaster] (NP_001287250.1)	111	0.12
Cluster of elongation factor 1alpha48D, isoform E [Drosophila melanogaster] (NP_001286322.1)	112	0.1
Gamma-interferon-inducible lysosomal thiol reductase 1 [Drosophila melanogaster]	113	0.1
ribosomal protein S3A, isoform F [Drosophila melanogaster]	114	0.09
histone H2B [Drosophila melanogaster]	115	0.08
cup, isoform C [Drosophila melanogaster]	116	0.06
Cluster of Rab35, isoform D [Drosophila melanogaster] (NP_001259739.1)	117	0.06
ribosomal protein L37A, isoform C [Drosophila melanogaster]	118	0.05
ubiquitin activating enzyme 5 [Drosophila melanogaster]	119	0
dynein heavy chain 64C, isoform E [Drosophila melanogaster]	120	0
Cluster of ribosomal protein L13A, isoform B [Drosophila melanogaster] (NP_649560.1)	121	0
yellow-g [Drosophila melanogaster]	122	0
malic enzyme, isoform B [Drosophila melanogaster]	123	0
Cluster of wing blister, isoform G [Drosophila melanogaster] (NP_476790.3-DECOY)	124	0
alpha spectrin, isoform B [Drosophila melanogaster]	125	0
Cluster of adenosylhomocysteinase like 1 [Drosophila melanogaster] (NP_647746.1)	126	0
TER94, isoform E [Drosophila melanogaster]	127	0
Cluster of lipophorin receptor 1, isoform K [Drosophila melanogaster] (NP_001097934.2)	128	0
Rab7, isoform C [Drosophila melanogaster]	129	0
clathrin heavy chain, isoform G [Drosophila melanogaster]	130	0
Cluster of G protein alpha q subunit, isoform D [Drosophila melanogaster] (NP_725196.1)	131	0
chorion protein a at 7F [Drosophila melanogaster]	132	0
belle, isoform B [Drosophila melanogaster]	133	0
beta spectrin, isoform A [Drosophila melanogaster]	134	0
yellow-g2 [Drosophila melanogaster]	135	0
succinate dehydrogenase, subunit A (flavoprotein), isoform C [Drosophila melanogaster]	136	0
Cluster of Rab6, isoform B [Drosophila melanogaster] (NP_001285869.1)	137	0
uncharacterized protein Dmel_CG30069 [Drosophila melanogaster]	138	0
chorion protein 19 [Drosophila melanogaster]	139	0
Sarco/endoplasmic reticulum Ca(2+)-ATPase, isoform A [Drosophila melanogaster]	140	0
Rap1 GTPase, isoform C [Drosophila melanogaster]	141	0
Rab2, isoform B [Drosophila melanogaster]	142	0
sister of feo, isoform B [Drosophila melanogaster]	143	0
chorion protein 15 [Drosophila melanogaster]	144	0
CG4447 [Drosophila melanogaster]	145	0
regulatory particle triple-A ATPase 1 [Drosophila melanogaster]	146	0
Cluster of vacuolar H[+] ATPase 68 kDa subunit 2, isoform F [Drosophila melanogaster] (NP_001260425.1)	147	0
chorion protein 38, isoform B [Drosophila melanogaster]	148	0
Rho1, isoform F [Drosophila melanogaster]	149	0
IGHG_RABIT RecName: Full=Ig gamma chain C region	150	0
uncharacterized protein Dmel_CG13084 [Drosophila melanogaster]	151	0
Cluster of Rac1, isoform B [Drosophila melanogaster] (NP_001261247.1)	152	0
uncharacterized protein Dmel_CG11876, isoform A [Drosophila melanogaster]	153	0
atilla, isoform C [Drosophila melanogaster]	154	0
Pi4KIIalpha, isoform B [Drosophila melanogaster]	155	0
CG5525 [Drosophila melanogaster]	156	0
uncharacterized protein Dmel_CG11381 [Drosophila melanogaster]	157	0
DnaJ-like-2, isoform E [Drosophila melanogaster]	158	-0.02
chorion protein 36 [Drosophila melanogaster]	159	-0.04
mitochondrial trifunctional protein alpha subunit, isoform A [Drosophila melanogaster]	160	-0.12
glycogen synthase, isoform A [Drosophila melanogaster]	161	-0.15
bellwether [Drosophila melanogaster]	162	-0.15
rudimentary, isoform E [Drosophila melanogaster]	163	-0.24
ribosomal protein S20 [Drosophila melanogaster]	164	-0.24
ribosomal protein S29, isoform B [Drosophila melanogaster]	165	-0.24
uncharacterized protein Dmel_CG12262 [Drosophila melanogaster]	166	-0.25
ribosomal protein L12, isoform C [Drosophila melanogaster]	167	-0.28
ribosomal protein S16, isoform B [Drosophila melanogaster]	168	-0.3
ribosomal protein L13, isoform C [Drosophila melanogaster]	169	-0.31
uncharacterized protein Dmel_CG15293, isoform C [Drosophila melanogaster]	170	-0.35
ribosomal protein S9, isoform E [Drosophila melanogaster]	171	-0.36
cysteine proteinase-1, isoform C [Drosophila melanogaster]	172	-0.39
ribosomal protein S19a, isoform E [Drosophila melanogaster]	173	-0.44
ribosomal protein L36A, isoform B [Drosophila melanogaster]	174	-0.46
heat shock protein 83, isoform B [Drosophila melanogaster]	175	-0.49
Cluster of actin 5C, isoform E [Drosophila melanogaster] (NP_001284915.1)	176	-0.58
Cluster of histone H4 [Drosophila melanogaster] (NP_001027382.1)	177	-0.58
Cluster of yolk protein 3, isoform B [Drosophila melanogaster] (NP_001285228.1)	178	-0.65
yolk protein 1, isoform B [Drosophila melanogaster]	179	-0.71
Rab5, isoform I [Drosophila melanogaster]	180	-0.72
Cluster of tropomyosin 1, isoform O [Drosophila melanogaster] (NP_732001.3)	181	-0.81
Ran, isoform D [Drosophila melanogaster]	182	-0.86
yolk protein 2, isoform B [Drosophila melanogaster]	183	-0.94
Cluster of defective chorion 1, isoform G [Drosophila melanogaster] (NP_001245569.1)	184	-0.98
ribosomal protein L27, isoform D [Drosophila melanogaster]	185	-1.03
Cluster of eukaryotic initiation factor 4a, isoform F [Drosophila melanogaster] (NP_001260117.1)	186	-1.05
Cluster of ATP synthase, beta subunit, isoform D [Drosophila melanogaster] (NP_001284719.1)	187	-1.06
Cluster of glyceraldehyde 3 phosphate dehydrogenase 2, isoform C [Drosophila melanogaster] (NP_001259584.1)	188	-1.1
CG8507 [Drosophila melanogaster]	189	-1.11
Cluster of troponin C at 73F, isoform C [Drosophila melanogaster] (NP_001287091.1)	190	-1.19
ribosomal protein S4, isoform C [Drosophila melanogaster]	191	-1.31
thioredoxin peroxidase 1, isoform E [Drosophila melanogaster]	192	-1.33
ribosomal protein L26, isoform C [Drosophila melanogaster]	193	-1.35
uncharacterized protein Dmel_CG17754, isoform G [Drosophila melanogaster]	194	-1.36
lethal (1) G0156, isoform C [Drosophila melanogaster]	195	-1.38
female-specific independent of transformer [Drosophila melanogaster]	196	-1.44
Chain C, Porcine E-Trypsin	197	-1.45
ribosomal protein L29, isoform D [Drosophila melanogaster]	198	-1.85
ribosomal protein S5b, isoform A [Drosophila melanogaster]	199	-1.88
Cluster of ribosomal protein S27A [Drosophila melanogaster] (NP_476778.1)	200	-2.01
uncharacterized protein Dmel_CG33308 [Drosophila melanogaster]	201	-2.19
regulatory particle triple-A ATPase 6 [Drosophila melanogaster]	202	-2.26
ribosomal protein L35A [Drosophila melanogaster]	203	-2.48
deadhead, isoform B [Drosophila melanogaster]	204	-2.5
Cluster of myosin heavy chain, isoform U [Drosophila melanogaster] (NP_001246051.1)	205	-3.09
tropomyosin 2, isoform G [Drosophila melanogaster]	206	-3.16
elongation factor 2, isoform C [Drosophila melanogaster]	207	-3.28
abnormal spindle [Drosophila melanogaster]	208	-4.8
fibrillarin [Drosophila melanogaster]	209	-5.58
transferrin 1, isoform C [Drosophila melanogaster]	210	-16.62
THIO_ECOLI RecName: Full=Thioredoxin-1; Short=Trx-1	211	-17.01
glycoprotein 93 [Drosophila melanogaster]	212	-17.57
chorion protein b at 7F, isoform A [Drosophila melanogaster]	213	-17.76
CG7637 [Drosophila melanogaster]	214	-18.03
Cluster of G protein alpha s subunit, isoform D [Drosophila melanogaster] (NP_001163283.1)	215	-18.73
Cluster of papilin, isoform E [Drosophila melanogaster] (NP_788752.2)	216	-18.95
Rho guanine nucleotide exchange factor at 64C, isoform B [Drosophila melanogaster]	217	-18.96
heat shock protein cognate 5, isoform B [Drosophila melanogaster]	218	-19.34
CG8258 [Drosophila melanogaster]	219	-19.62
secreted Wg-interacting molecule, isoform B [Drosophila melanogaster]	220	-19.64
uncharacterized protein Dmel_CG13364 [Drosophila melanogaster]	221	-19.97
Rab11, isoform A [Drosophila melanogaster]	222	-20.02
Cluster of wings up A, isoform A [Drosophila melanogaster] (NP_728141.1)	223	-20.05
CG8036, isoform D [Drosophila melanogaster]	224	-20.14
Cluster of heat shock protein 60A, isoform B [Drosophila melanogaster] (NP_727489.1)	225	-20.36
elongation factor 1 beta, isoform C [Drosophila melanogaster]	226	-20.52
ribosomal protein L36, isoform E [Drosophila melanogaster]	227	-20.89
twinstar [Drosophila melanogaster]	228	-21.27
cyclophilin 1 [Drosophila melanogaster]	229	-21.32
megalin, isoform E [Drosophila melanogaster]	230	-21.36
casein kappa [Bos taurus]	231	-21.99
CG2233 [Drosophila melanogaster]	232	-22.13
uncharacterized protein Dmel_CG33923 [Drosophila melanogaster]	233	-23.8
