# Supplementary material for: The GNU subunit of PNG kinase, the developmental regulator of mRNA translation, binds BIC-C to localize to RNP granules
Source: eLife. 2021 Jul 12;10:e67294. doi: 10.7554/eLife.67294 (PMC8313231; doi:10.7554/eLife.67294)
Supplement: Figure 1—figure supplement 2—source data 1. — Results are shown in Figure 1—figure supplement 2 and Table 1. [file elife-67294-fig1-figsupp2-data1.xlsx]

## Sheet: Raw results
Figure 1-Source Data 2
Source Data for Figure 1-Supplement 2. Total spectrum counts for GNU-WT-GFP, GNU-deltaSAM-GFP and H2Av-GFP pull downs. Two replicates for each sample were performed, except for H2Av-GFp, so which three replicates were performed.
and Table 1
			Total spectrum count
Identified Proteins	Alternate ID	Molecular Weight	GNU-WT-GFP (1)	GNU-WT-GFP (2)	GNU-deltaSAM-GFP (1)	GNU-deltaSAM-GFP (2)	H2Av-GFP (1)	H2Av-GFP (2)	H2Av-GFP (3)
GFP_AEQVI RecName: Full=Green fluorescent protein	NA	27 kDa	319	376	353	520	49	31	358
giant nuclei [Drosophila melanogaster]	gnu	27 kDa	179	178	152	109			3
bicaudal C, isoform B [Drosophila melanogaster]	BicC	98 kDa	92	13	1	0
twenty-four, isoform M [Drosophila melanogaster]	tyf	174 kDa	64	6	45	5	3		11
poly(A) binding protein, isoform C [Drosophila melanogaster]	pAbp	70 kDa	51	13	47	5			24
Cluster of heat shock protein cognate 4, isoform G [Drosophila melanogaster] (NP_001262586.1)	Hsc70-4	71 kDa	46	27	92	44	30	12	63
Cluster of ypsilon schachtel, isoform B [Drosophila melanogaster] (NP_001246730.1)	yps	37 kDa	40	11	38	2			28
Cluster of twins, isoform I [Drosophila melanogaster]	tws	57 kDa	39	9	92	14
twenty-four, isoform N [Drosophila melanogaster]		200 kDa	38	11
Cluster of beta-Tubulin at 56D, isoform B [Drosophila melanogaster] (NP_523795.2)	betaTub56D	50 kDa	33	8	22	12	20	15	16
heat shock 70-kDa protein cognate 3, isoform E [Drosophila melanogaster]	Hsc70-3	72 kDa	29	25	65	40	26	8	44
protein phosphatase 2A at 29B, isoform A [Drosophila melanogaster]	Pp2A-29B	65 kDa	27	0	52				5
Ataxin-2, isoform B [Drosophila melanogaster]	Atx2	118 kDa	20	6	23	6			6
fibrillarin [Drosophila melanogaster]	Fib	35 kDa	19	0	5				6
rasputin, isoform G [Drosophila melanogaster]	rin	75 kDa	15	0	17		3		9
belphegor, isoform B [Drosophila melanogaster]	bor	68 kDa	14	2	4	0
ribosomal protein L4 [Drosophila melanogaster]	RpL4	45 kDa	13	0	15		20	9	70
ribosomal protein L23A [Drosophila melanogaster]		29 kDa	11	12	0
heterogeneous nuclear ribonucleoprotein at 27C, isoform H [Drosophila melanogaster]	Hrb27C	45 kDa	11	0	6
microtubule star, isoform C [Drosophila melanogaster]	mts	35 kDa	10	0	42	5
ribosomal protein L18, isoform C [Drosophila melanogaster]	RpL18	22 kDa	9	3	12	0	2	4	45
heat shock protein 27, isoform B [Drosophila melanogaster]	Hsp27	24 kDa	9	3	12	8			3
CG4586 [Drosophila melanogaster]	CG4586	77 kDa	9	2	4	0
ribosomal protein S6, isoform B [Drosophila melanogaster]	RpS6	28 kDa	8	4	7	0	6		35
eukaryotic translation initiation factor 4G, isoform B [Drosophila melanogaster]	eIF4G	211 kDa	8	3	13	0	3		11
heat shock protein 26, isoform B [Drosophila melanogaster]	Hsp26	23 kDa	8	0	11	5
ribosomal protein L8, isoform B [Drosophila melanogaster]	RpL8	28 kDa	8	0	16	2	6	7	27
ribosomal protein L36A, isoform B [Drosophila melanogaster]		13 kDa	7	5
ribosomal protein L10Ab, isoform A [Drosophila melanogaster]	RpL10Ab	24 kDa	7	3	8	0	9	8	43
ribosomal protein L23 [Drosophila melanogaster]	RpL23	2	7	0	5	2	2		7
eukaryotic initiation factor 4E, isoform I [Drosophila melanogaster]	eIF-4E	29 kDa	7		6				6
ribosomal protein L14 [Drosophila melanogaster]	RpL14	19 kDa	6	3	7	0	7	8	42
Tcp1-like, isoform B [Drosophila melanogaster]	T-cp1	60 kDa	6	3		0			5
ribosomal protein S17 [Drosophila melanogaster]	RpS17	15 kDa	6	2	6	3
ribosomal protein S26, isoform E [Drosophila melanogaster]	RpS26	13 kDa	6	0	2	3
ribosomal protein L23A [Drosophila melanogaster]	RpL23A	29 kDa	6	0	9	2	5	2	45
Cluster of elongation factor 1alpha48D, isoform E [Drosophila melanogaster] (NP_001286322.1)	Ef1alpha48D	50 kDa	6		8				6
Cluster of Fmr1, isoform G [Drosophila melanogaster] (NP_001247017.1)	Fmr1	81 kDa	6		7				2
CG5726 [Drosophila melanogaster]	CG5726	87 kDa	6		8				3
ribosomal protein L28, isoform G [Drosophila melanogaster]	RpL28	16 kDa	5	3	6	3	5		19
spindle assembly abnormal 4 [Drosophila melanogaster]	Sas-4	103 kDa	5
histone H4 [Drosophila melanogaster]	His4:CG33869	11 kDa	5		6	3	11	13	18
Lon protease, isoform C [Drosophila melanogaster]	Lon	115 kDa	5
GTPase activating protein and centrosome-associated, isoform B [Drosophila melanogaster]	GAPcenA	133 kDa	5
lingerer, isoform D [Drosophila melanogaster]	lig	139 kDa	5		2				5
ribosomal protein L11, isoform B [Drosophila melanogaster]	RpL11	21 kDa	5		5				7
Cluster of jabba, isoform C [Drosophila melanogaster] (NP_001137703.1)	Jabba	63 kDa	5		4		177	99	933
ribosomal protein L30, isoform E [Drosophila melanogaster]	RpL30	12 kDa	4	0	4	2			24
Isoleucyl-tRNA synthetase, isoform D [Drosophila melanogaster]	IleRS	141 kDa	4						3
ribosomal protein L27, isoform D [Drosophila melanogaster]	RpL27	16 kDa	4		3		9
La related protein, isoform H [Drosophila melanogaster]	larp	178 kDa	4
IGF-II mRNA-binding protein, isoform K [Drosophila melanogaster]	Imp	69 kDa	4		3				5
uncharacterized protein Dmel_CG17018, isoform E [Drosophila melanogaster]	CG17018	144 kDa	3	3	4	0
abnormal spindle [Drosophila melanogaster]	asp	230 kDa	3	2	4	0
ribosomal protein S24 [Drosophila melanogaster]	RpS24	15 kDa	3
ribosomal protein L21, isoform C [Drosophila melanogaster]	RpL21	18 kDa	3						19
ribosomal protein L9, isoform C [Drosophila melanogaster]	RpL9	21 kDa	3				2	2	20
ribosomal protein L7, isoform B [Drosophila melanogaster]	RpL7	30 kDa	3		6		11	5	39
bellwether [Drosophila melanogaster]	blw	59 kDa	3				8	3	54
glycogen synthase, isoform D [Drosophila melanogaster]	GlyS	79 kDa	3		4		4		14
ribosomal protein S9, isoform E [Drosophila melanogaster]	RpS9	23 kDa	2	0	2	2	3		13
wispy, isoform B [Drosophila melanogaster]	wisp	151 kDa	2						2
Cluster of ribosomal protein L34b, isoform D [Drosophila melanogaster] (NP_001287250.1)	RpL34b	18 kDa	2		6		2		16
ribosomal protein L15, isoform I [Drosophila melanogaster]	RpL15	24 kDa	2				4	2	20
peroxin 14 [Drosophila melanogaster]	Pex14	31 kDa	2		2
CG8507 [Drosophila melanogaster]	CG8507	45 kDa	2		3				4
Cluster of eukaryotic initiation factor 4a, isoform F [Drosophila melanogaster] (NP_001260117.1)	eIF-4a	46 kDa	2
Cluster of regulatory particle triple-A ATPase 5 [Drosophila melanogaster] (NP_524464.1)	Rpt5	48 kDa	2
gamma-Tubulin at 37C, isoform B [Drosophila melanogaster]	gammaTub37C	51 kDa	2						7
Aspartyl-tRNA synthetase, isoform B [Drosophila melanogaster]	AspRS	59 kDa	2						3
ribosomal protein S14b, isoform B [Drosophila melanogaster]	RpS14b	16 kDa		9		2	9	4	35
Cluster of stress-sensitive B, isoform E [Drosophila melanogaster] (NP_001285090.1)		33 kDa		8		9			22
ribosomal protein S16, isoform B [Drosophila melanogaster]	RpS16	17 kDa		6		2			24
protein phosphatase 2A at 29B, isoform D [Drosophila melanogaster]		72 kDa		4		7
argonaute 2, isoform B [Drosophila melanogaster]	AGO2	137 kDa		2		0
transforming acidic coiled-coil protein, isoform N [Drosophila melanogaster]		137 kDa		2		0
zipper, isoform D [Drosophila melanogaster]	zip	232 kDa		2	9	0
glycogen synthase, isoform A [Drosophila melanogaster]		82 kDa		2		3
Na pump alpha subunit, isoform I [Drosophila melanogaster]		111 kDa		0		0
lipophorin receptor 1, isoform K [Drosophila melanogaster]		119 kDa		0		2
ribosomal protein L36A, isoform B [Drosophila melanogaster]	RpL36A	13 kDa		0	3	2			22
Cluster of troponin C at 73F, isoform C [Drosophila melanogaster] (NP_001287091.1)		18 kDa		0		0
ribosomal protein L24, isoform C [Drosophila melanogaster]	RpL24	18 kDa		0					10
ADP ribosylation factor at 102F, isoform B [Drosophila melanogaster]		21 kDa		0		0
Rac2, isoform B [Drosophila melanogaster]		21 kDa		0		0
Rap1 GTPase, isoform C [Drosophila melanogaster]		21 kDa		0		0
Rho guanine nucleotide exchange factor at 64C, isoform B [Drosophila melanogaster]		215 kDa		0		0
Rho1, isoform F [Drosophila melanogaster]		22 kDa		0		0
Cluster of Rab6, isoform B [Drosophila melanogaster] (NP_001285869.1)		23 kDa		0		0
Rab7, isoform C [Drosophila melanogaster]		23 kDa		0		0
Gamma-interferon-inducible lysosomal thiol reductase 1 [Drosophila melanogaster]	GILT1	28 kDa		0		3			18
uncharacterized protein Dmel_CG30069 [Drosophila melanogaster]		461 kDa		0		2
uncharacterized protein Dmel_CG13084 [Drosophila melanogaster]		51 kDa		0		4
malic enzyme, isoform B [Drosophila melanogaster]	Men	85 kDa		0		8
TER94, isoform C [Drosophila melanogaster]		92 kDa		0		0
transportin, isoform D [Drosophila melanogaster]		102 kDa							4
eIF3-S8, isoform B [Drosophila melanogaster]		106 kDa							3
Sarco/endoplasmic reticulum Ca(2+)-ATPase, isoform I [Drosophila melanogaster]	SERCA	109 kDa					9	2	48
CAS/CSE1 segregation protein [Drosophila melanogaster]		110 kDa							2
Methionyl-tRNA synthetase [Drosophila melanogaster]		112 kDa							2
Ranbp9, isoform D [Drosophila melanogaster]	Ranbp9	114 kDa					3		18
ribosomal protein LP2 [Drosophila melanogaster]		12 kDa							16
bonus, isoform B [Drosophila melanogaster]	bon	121 kDa			2
karyopherin beta 3, isoform B [Drosophila melanogaster]		124 kDa							36
RING-associated factor 2, isoform C [Drosophila melanogaster]		125 kDa							0
GRIP and coiled-coil domain containing 185 kDa [Drosophila melanogaster]		130 kDa							3
CG7728 [Drosophila melanogaster]	CG7728	133 kDa					2
eIF3-S10, isoform D [Drosophila melanogaster]		134 kDa							3
female-specific independent of transformer [Drosophila melanogaster]	fit	14 kDa
histone H2B [Drosophila melanogaster]	His2B:CG	14 kDa							97
histone H2B [Drosophila melanogaster]		14 kDa
hoi-polloi, isoform B [Drosophila melanogaster]		14 kDa							6
ribosomal protein L36, isoform E [Drosophila melanogaster]	RpL36	14 kDa					3		27
golden goal [Drosophila melanogaster]		140 kDa							9
atilla, isoform C [Drosophila melanogaster]	atilla	15 kDa							4
Cluster of histone H2A variant, isoform B [Drosophila melanogaster] (NP_001262997.1)	His2Av	15 kDa					34	21	106
ribosomal protein L31, isoform C [Drosophila melanogaster]	RpL31	15 kDa
Cluster of host cell factor, isoform G [Drosophila melanogaster] (NP_995595.1)	Hcf	160 kDa					2
host cell factor, isoform G [Drosophila melanogaster]		160 kDa							28
ATP synthase, delta subunit, isoform C [Drosophila melanogaster]		17 kDa							6
calmodulin, isoform E [Drosophila melanogaster]	Cam	17 kDa					2		2
ribosomal protein L26, isoform C [Drosophila melanogaster]	RpL26	17 kDa					6		28
ribosomal protein L32, isoform C [Drosophila melanogaster]	RpL32	17 kDa			5				19
uncharacterized protein Dmel_CG31368, isoform C [Drosophila melanogaster]		172 kDa							2
CG8370, isoform B [Drosophila melanogaster]		173 kDa							0
CCHC-type zinc finger nucleic acid binding protein, isoform B [Drosophila melanogaster]	CNBP	18 kDa
ribosomal protein L35A [Drosophila melanogaster]	RpL35A	18 kDa							59
listerin E3 ubiquitin protein ligase 1 [Drosophila melanogaster]		199 kDa							4
ATP synthase, subunit D, isoform C [Drosophila melanogaster]		20 kDa							5
twenty-four, isoform N [Drosophila melanogaster]		200 kDa
ribosomal protein L18A [Drosophila melanogaster]	RpL18A	21 kDa					8		46
enhancer of polycomb, isoform C [Drosophila melanogaster]	E(Pc)	216 kDa					17	5	40
MRG/MORF4L binding protein [Drosophila melanogaster]		22 kDa							9
ribosomal protein L17, isoform E [Drosophila melanogaster]	RpL17	22 kDa					3		11
protein partner of snf, isoform B [Drosophila melanogaster]	pps	222 kDa					9	3	44
Esa1-associated factor 6 [Drosophila melanogaster]		24 kDa							8
ribosomal protein L13A, isoform B [Drosophila melanogaster]	RpL13A	24 kDa					3		28
uncharacterized protein Dmel_CG15735 [Drosophila melanogaster]	CG15735	24 kDa			2				3
DNA polymerase epsilon 255kD subunit [Drosophila melanogaster]		257 kDa							8
Gas41 [Drosophila melanogaster]	Gas41	26 kDa					3		6
megator, isoform B [Drosophila melanogaster]	Mtor	262 kDa			6
alpha spectrin, isoform B [Drosophila melanogaster]	alpha-Spec	283 kDa			3
ribosomal protein L23A [Drosophila melanogaster]		29 kDa
ribosomal protein L23A [Drosophila melanogaster]		29 kDa
uncharacterized protein Dmel_CG10880, isoform B [Drosophila melanogaster]		32 kDa							3
ATP synthase, gamma subunit, isoform C [Drosophila melanogaster]	ATPsyngamma	33 kDa					5		22
ribosomal protein LP0, isoform B [Drosophila melanogaster]		34 kDa							19
Cluster of domino, isoform G [Drosophila melanogaster] (NP_001286676.1)	dom	354 kDa					46	22	117
CG6937 [Drosophila melanogaster]	CG6937	40 kDa					3		20
YL-1, isoform B [Drosophila melanogaster]		40 kDa							9
lethal (1) G0156, isoform D [Drosophila melanogaster]	l(1)G0156	41 kDa			3				7
mapmodulin, isoform D [Drosophila melanogaster]	Mapmodulin	41 kDa					22	17	74
Cluster of actin 42A [Drosophila melanogaster] (NP_523625.1)		42 kDa							44
nucleosome assembly protein 1, isoform C [Drosophila melanogaster]	Nap1	43 kDa					4		25
Nipped-A, isoform E [Drosophila melanogaster]	Nipped-A	435 kDa					16	7	75
Actin-related protein 6 [Drosophila melanogaster]		45 kDa							8
Cluster of regulatory particle triple-A ATPase 6 [Drosophila melanogaster] (NP_608447.1)	Rpt6	46 kDa
uncharacterized protein Dmel_CG12262 [Drosophila melanogaster]	CG12262	46 kDa			6
brahma associated protein 55kD [Drosophila melanogaster]	Bap55	47 kDa					11	4	41
ribosomal protein L3, isoform H [Drosophila melanogaster]	RpL3	47 kDa					9	5	43
MORF-related gene 15, isoform B [Drosophila melanogaster]	MRG15	48 kDa					3	2	11
DNA methyltransferase 1 associated protein 1 [Drosophila melanogaster]	DMAP1	50 kDa					12	4	41
eukaryotic translation elongation factor 1 alpha 1, isoform E [Drosophila melanogaster]	eEF1alpha1	50 kDa
pontin [Drosophila melanogaster]	pont	50 kDa					8	5	44
elongation factor 1alpha100E, isoform C [Drosophila melanogaster]	Ef1alpha100E	51 kDa					5	9
Int6 [Drosophila melanogaster]		51 kDa							2
thiolase [Drosophila melanogaster]		51 kDa							2
Sec61 alpha subunit, isoform B [Drosophila melanogaster]		52 kDa							3
LDL receptor protein 1, isoform F [Drosophila melanogaster]	LRP1	531 kDa						2
reptin, isoform C [Drosophila melanogaster]	rept	54 kDa					16	8	80
ATP synthase, beta subunit, isoform C [Drosophila melanogaster]	ATPsynbeta	55 kDa			2			2	26
histone deacetylase 1 [Drosophila melanogaster]	HDAC1	58 kDa					16	10	24
pendulin [Drosophila melanogaster]		58 kDa							2
T-cp1zeta [Drosophila melanogaster]	Tcp-1zet	58 kDa
cctgamma, isoform D [Drosophila melanogaster]	Cctgamma	59 kDa
CG8258 [Drosophila melanogaster]	CG8258	59 kDa
purity of essence, isoform B [Drosophila melanogaster]		591 kDa
Cluster of heat shock protein 60A, isoform B [Drosophila melanogaster] (NP_727489.1)	Hsp60A	61 kDa
CG1620, isoform C [Drosophila melanogaster]	CG1620	64 kDa					10	3
Cluster of CG1620, isoform C [Drosophila melanogaster] (NP_001260777.1)		64 kDa							33
stunted, isoform A [Drosophila melanogaster]		7 kDa							4
uncharacterized protein Dmel_CG13364 [Drosophila melanogaster]	CG13364	7 kDa							9
transferrin 1, isoform C [Drosophila melanogaster]	Tsf1	72 kDa
heat shock protein cognate 5, isoform B [Drosophila melanogaster]	Hsc70-5	74 kDa			4
apoptosis inducing factor, isoform C [Drosophila melanogaster]		81 kDa							5
mitochondrial trifunctional protein alpha subunit, isoform A [Drosophila melanogaster]	Mtpalpha	84 kDa			3		2		3
belle, isoform B [Drosophila melanogaster]	bel	85 kDa
ATP synthase, subunit E, isoform C [Drosophila melanogaster]		9 kDa							4
bromodomain containing 8 [Drosophila melanogaster]	Brd8	94 kDa					4	2	29
elongation factor 2, isoform C [Drosophila melanogaster]	EF2	94 kDa					11	3
aluminum tubes, isoform H [Drosophila melanogaster]	alt	95 kDa					3		12
uncharacterized protein Dmel_CG30497, isoform A [Drosophila melanogaster]		97 kDa							2

## Sheet: Raw results (9A)
	Figure 1-Source Data 3
	Source Data for Figure 1-Supplement 2. Total spectrum counts for GNU-9A-GFP pull downs. Two replicates for each sample were performed.
		Total spectrum count
		GNU-9A-GFP (1)	GNU-9A-GFP (2)
1	GFP_AEQVI RecName: Full=Green fluorescent protein	62	52
2	Cluster of giant nuclei [Drosophila melanogaster] (NP_648726.1)	90	81
3	Cluster of ribosomal protein S27A [Drosophila melanogaster] (NP_476778.1)	27	34
4	Cluster of heat shock protein cognate 4, isoform G [Drosophila melanogaster] (NP_001262586.1)	32	34
5	Cluster of actin 5C, isoform E [Drosophila melanogaster] (NP_001284915.1)	30	25
8	heat shock 70-kDa protein cognate 3, isoform E [Drosophila melanogaster]	14	16
7	ribosomal protein S3, isoform B [Drosophila melanogaster]	28	38
44	ribosomal protein S23, isoform B [Drosophila melanogaster]	3	8
6	ENO1_YEAST Enolase 1 - Saccharomyces cerevisiae (Baker's yeast).	2	3
36	ribosomal protein S14b, isoform B [Drosophila melanogaster]	14	14
20	ribosomal protein L29, isoform D [Drosophila melanogaster]	10	27
12	Cluster of beta-Tubulin at 56D, isoform B [Drosophila melanogaster] (NP_523795.2)	11	21
10	Cluster of twins, isoform I [Drosophila melanogaster] (NP_001287269.1)	10	3
9	ribosomal protein S25, isoform B [Drosophila melanogaster]	10	32
24	Cluster of stress-sensitive B, isoform E [Drosophila melanogaster] (NP_001285090.1)	7	10
38	Cluster of heat shock protein 68 [Drosophila melanogaster] (NP_524474.1)	7	7
13	yolk protein 2, isoform B [Drosophila melanogaster]	9	27
15	Cluster of yolk protein 3, isoform B [Drosophila melanogaster] (NP_001285228.1)	8	14
51	Cluster of ribosomal protein S11, isoform C [Drosophila melanogaster] (NP_725114.1)	4	8
27	Cluster of elongation factor 1alpha48D, isoform E [Drosophila melanogaster] (NP_001286322.1)	4	5
16	yolk protein 1, isoform B [Drosophila melanogaster]	10	18
18	poly(A) binding protein, isoform C [Drosophila melanogaster]	11	4
19	Cluster of defective chorion 1, isoform G [Drosophila melanogaster] (NP_001245569.1)	2	47
21	twenty-four, isoform N [Drosophila melanogaster]	9	0
22	Cluster of bicaudal C, isoform B [Drosophila melanogaster] (NP_723948.1)	5	0
54	heat shock protein cognate 2 [Drosophila melanogaster]	6	6
50	Ataxin-2, isoform B [Drosophila melanogaster]	2	0
33	Cluster of alpha-Tubulin at 84B [Drosophila melanogaster] (NP_476772.1)	6	10
25	Cluster of ypsilon schachtel, isoform B [Drosophila melanogaster] (NP_001246730.1)	10	1
37	ribosomal protein S27, isoform B [Drosophila melanogaster]	10	11
34	ribosomal protein S8, isoform G [Drosophila melanogaster]	10	10
40	ribosomal protein S7, isoform E [Drosophila melanogaster]	5	9
58	ribosomal protein S16, isoform B [Drosophila melanogaster]	6	8
39	ribosomal protein S3A, isoform F [Drosophila melanogaster]	5	5
62	cup, isoform C [Drosophila melanogaster]	7	4
55	thioredoxin peroxidase 1, isoform E [Drosophila melanogaster]	5	7
26	Cluster of protein phosphatase 2A at 29B, isoform A [Drosophila melanogaster] (NP_001027227.1)	8	4
17	ribosomal protein L22 [Drosophila melanogaster]	32	25
31	Cluster of trailer hitch, isoform C [Drosophila melanogaster] (NP_001261770.1)	5	5
61	ribosomal protein S6, isoform B [Drosophila melanogaster]	8	9
14	ribosomal protein L38, isoform B [Drosophila melanogaster]	5	18
32	CG3800, isoform B [Drosophila melanogaster]	2	11
29	ribosomal protein L7A, isoform F [Drosophila melanogaster]	16	18
45	maternal expression at 31B, isoform A [Drosophila melanogaster]	6	8
52	ribosomal protein L10, isoform E [Drosophila melanogaster]	6	9
42	heat shock protein 27, isoform B [Drosophila melanogaster]	10	16
70	ribosomal protein L18, isoform C [Drosophila melanogaster]	8	7
23	eukaryotic translation initiation factor 4G, isoform B [Drosophila melanogaster]	7	1
64	ribosomal protein L10Ab, isoform A [Drosophila melanogaster]	6	5
56	ribosomal protein L27A, isoform D [Drosophila melanogaster]	3	5
80	ribosomal protein L14 [Drosophila melanogaster]	5	4
81	ribosomal protein L37A, isoform C [Drosophila melanogaster]	1	3
110	Tcp1-like, isoform B [Drosophila melanogaster]	3	4
63	ribosomal protein L28, isoform G [Drosophila melanogaster]	5	6
91	belphegor, isoform B [Drosophila melanogaster]	4	2
48	alpha-Tubulin at 67C [Drosophila melanogaster]	8	7
41	ribosomal protein S19a, isoform E [Drosophila melanogaster]	2	6
120	CG4586 [Drosophila melanogaster]	1	0
65	heat shock protein 26, isoform B [Drosophila melanogaster]	5	6
68	ribosomal protein S20 [Drosophila melanogaster]	5	5
43	ribosomal protein S18, isoform B [Drosophila melanogaster]	9	13
85	ribosomal protein S17 [Drosophila melanogaster]	3	2
93	ribosomal protein L12, isoform C [Drosophila melanogaster]	1	4
78	ribosomal protein L13, isoform C [Drosophila melanogaster]	1	1
11	uncharacterized protein Dmel_CG33308 [Drosophila melanogaster]	0	0
84	Chain C, Porcine E-Trypsin	2	2
67	glycogen synthase, isoform A [Drosophila melanogaster]	0	4
96	abnormal spindle [Drosophila melanogaster]	4	2
76	ribosomal protein L6, isoform B [Drosophila melanogaster]	6	7
115	megator, isoform B [Drosophila melanogaster]	0	0
138	Cluster of sterol carrier protein X-related thiolase [Drosophila melanogaster] (NP_524715.2)	1	0
60	heat shock protein 83, isoform B [Drosophila melanogaster]	2	6
92	ribosomal protein L26, isoform C [Drosophila melanogaster]	9	4
187	argonaute 2, isoform B [Drosophila melanogaster]	0	2
35	fibrillarin [Drosophila melanogaster]	1	2
49	ribosomal protein L4 [Drosophila melanogaster]	10	8
47	microtubule star, isoform C [Drosophila melanogaster]	3	1
57	pyruvate kinase, isoform A [Drosophila melanogaster]	0	7
46	ribosomal protein L8, isoform B [Drosophila melanogaster]	8	14
103	eukaryotic initiation factor 4E, isoform I [Drosophila melanogaster]	3	0
59	ribosomal protein L23A [Drosophila melanogaster]	5	8
118	ribosomal protein S26, isoform E [Drosophila melanogaster]	0	1
73	Cluster of histone H4 [Drosophila melanogaster] (NP_001027382.1)	3	4
109	Cluster of jabba, isoform C [Drosophila melanogaster] (NP_001137703.1)	2	3
146	GTPase activating protein and centrosome-associated, isoform B [Drosophila melanogaster]	2	2
94	ribosomal protein L27, isoform D [Drosophila melanogaster]	5	4
104	ribosomal protein S5b, isoform A [Drosophila melanogaster]	1	3
124	ribosomal protein L30, isoform E [Drosophila melanogaster]	4	3
139	IGF-II mRNA-binding protein, isoform K [Drosophila melanogaster]	1	0
189	Isoleucyl-tRNA synthetase, isoform D [Drosophila melanogaster]	0	0
28	ribosomal protein L24, isoform C [Drosophila melanogaster]	2	2
72	bellwether [Drosophila melanogaster]	2	8
125	histone H2B [Drosophila melanogaster]	2	3
158	ribosomal protein L9, isoform C [Drosophila melanogaster]	2	3
30	Cluster of myosin heavy chain, isoform U [Drosophila melanogaster] (NP_001246051.1)	0	0
69	14-3-3zeta, isoform F [Drosophila melanogaster]	2	2
74	Cluster of ribosomal protein L34b, isoform D [Drosophila melanogaster] (NP_001287250.1)	8	8
82	ribosomal protein S9, isoform E [Drosophila melanogaster]	3	2
86	ribosomal protein S29, isoform B [Drosophila melanogaster]	0	2
95	ribosomal protein L18A [Drosophila melanogaster]	6	5
130	ribosomal protein S4, isoform C [Drosophila melanogaster]	1	2
152	mitochondrial trifunctional protein alpha subunit, isoform A [Drosophila melanogaster]	1	2
184	wispy, isoform B [Drosophila melanogaster]	1	0
186	ribosomal protein L31, isoform C [Drosophila melanogaster]	1	3
215	roadkill, isoform C [Drosophila melanogaster]	0	0
100	14-3-3epsilon, isoform A [Drosophila melanogaster]	3	3
111	ribosomal protein L36A, isoform B [Drosophila melanogaster]	0	1
127	chorion protein 36 [Drosophila melanogaster]	2	3
161	Gamma-interferon-inducible lysosomal thiol reductase 1 [Drosophila melanogaster]	2	4
225	uncharacterized protein Dmel_CG15735 [Drosophila melanogaster]	1	0
90	Cluster of Rab35, isoform D [Drosophila melanogaster] (NP_001259739.1)	1	1
97	Cluster of tropomyosin 1, isoform O [Drosophila melanogaster] (NP_732001.3)	0	0
114	elongation factor 2, isoform C [Drosophila melanogaster]	1	3
165	deadhead, isoform B [Drosophila melanogaster]	2	2
77	rasputin, isoform G [Drosophila melanogaster]	5	1
134	heterogeneous nuclear ribonucleoprotein at 27C, isoform H [Drosophila melanogaster]	1	0
89	ribosomal protein L19, isoform B [Drosophila melanogaster]	7	9
106	ribosomal protein L23 [Drosophila melanogaster]	1	3
122	ribosomal protein S2, isoform C [Drosophila melanogaster]	2	2
105	ribosomal protein S13, isoform C [Drosophila melanogaster]	3	2
107	CG5726 [Drosophila melanogaster]	2	0
119	Cluster of Fmr1, isoform G [Drosophila melanogaster] (NP_001247017.1)	2	0
83	Ran, isoform D [Drosophila melanogaster]	2	7
101	ubiquitin activating enzyme 5 [Drosophila melanogaster]	0	6
121	cysteine proteinase-1, isoform C [Drosophila melanogaster]	0	3
131	ribosomal protein L11, isoform B [Drosophila melanogaster]	2	3
53	Cluster of glyceraldehyde 3 phosphate dehydrogenase 2, isoform C [Drosophila melanogaster] (NP_001259584.1)	5	7
149	ribosomal protein S5a, isoform D [Drosophila melanogaster]	0	2
181	La related protein, isoform H [Drosophila melanogaster]	0	1
71	ribosomal protein L7, isoform B [Drosophila melanogaster]	7	7
126	ribosomal protein L32, isoform C [Drosophila melanogaster]	2	3
133	rudimentary, isoform E [Drosophila melanogaster]	0	0
135	DnaJ-like-2, isoform E [Drosophila melanogaster]	2	4
144	ribosomal protein L21, isoform C [Drosophila melanogaster]	3	1
202	ribosomal protein S24 [Drosophila melanogaster]	0	0
98	ribosomal protein S10b, isoform E [Drosophila melanogaster]	0	4
99	ribosomal protein L3, isoform H [Drosophila melanogaster]	3	7
102	ribosomal protein L15, isoform I [Drosophila melanogaster]	6	6
136	Cluster of eukaryotic initiation factor 4a, isoform F [Drosophila melanogaster] (NP_001260117.1)	2	3
157	regulatory particle triple-A ATPase 6 [Drosophila melanogaster]	2	4
162	lethal (1) G0156, isoform C [Drosophila melanogaster]	2	3
203	gamma-Tubulin at 37C, isoform B [Drosophila melanogaster]	0	2
220	Aspartyl-tRNA synthetase, isoform B [Drosophila melanogaster]	1	0
112	Cluster of ATP synthase, beta subunit, isoform D [Drosophila melanogaster] (NP_001284719.1)	1	1
140	uncharacterized protein Dmel_CG17754, isoform G [Drosophila melanogaster]	0	1
142	uncharacterized protein Dmel_CG12262 [Drosophila melanogaster]	1	3
143	lost [Drosophila melanogaster]	1	0
148	ribosomal protein L17, isoform E [Drosophila melanogaster]	3	2
169	uncharacterized protein Dmel_CG15293, isoform C [Drosophila melanogaster]	0	0
172	ribosomal protein L35A [Drosophila melanogaster]	2	0
194	prophenoloxidase 2 [Drosophila melanogaster]	0	3
197	vitelline membrane 26Aa, isoform B [Drosophila melanogaster]	0	1
204	female-specific independent of transformer [Drosophila melanogaster]	1	1
206	T-cp1zeta [Drosophila melanogaster]	0	2
224	bonus, isoform B [Drosophila melanogaster]	0	0
79	Cluster of papilin, isoform E [Drosophila melanogaster] (NP_788752.2)	0	0
87	megalin, isoform E [Drosophila melanogaster]	0	1
88	Cluster of heat shock protein 60A, isoform B [Drosophila melanogaster] (NP_727489.1)	0	3
113	Cluster of G protein alpha s subunit, isoform D [Drosophila melanogaster] (NP_001163283.1)	1	0
116	Cluster of ribosomal protein L13A, isoform B [Drosophila melanogaster] (NP_649560.1)	3	3
123	Rab11, isoform A [Drosophila melanogaster]	1	0
128	yellow-g [Drosophila melanogaster]	0	0
132	casein kappa [Bos taurus]	1	2
141	malic enzyme, isoform B [Drosophila melanogaster]	0	2
150	Cluster of adenosylhomocysteinase like 1 [Drosophila melanogaster] (NP_647746.1)	7	1
155	heat shock protein cognate 5, isoform B [Drosophila melanogaster]	0	2
159	Rab7, isoform C [Drosophila melanogaster]	0	0
160	chorion protein b at 7F, isoform A [Drosophila melanogaster]	0	1
164	clathrin heavy chain, isoform G [Drosophila melanogaster]	1	1
170	belle, isoform B [Drosophila melanogaster]	1	3
171	beta spectrin, isoform A [Drosophila melanogaster]	0	0
174	ribosomal protein L36, isoform E [Drosophila melanogaster]	4	3
175	succinate dehydrogenase, subunit A (flavoprotein), isoform C [Drosophila melanogaster]	0	2
176	Cluster of Rab6, isoform B [Drosophila melanogaster] (NP_001285869.1)	1	0
185	Sarco/endoplasmic reticulum Ca(2+)-ATPase, isoform A [Drosophila melanogaster]	0	1
193	cyclophilin 1 [Drosophila melanogaster]	0	3
199	transferrin 1, isoform C [Drosophila melanogaster]	0	5
201	cctgamma, isoform D [Drosophila melanogaster]	0	2
205	CG4447 [Drosophila melanogaster]	0	2
207	CG8036, isoform D [Drosophila melanogaster]	0	3
208	twinstar [Drosophila melanogaster]	0	3
210	regulatory particle triple-A ATPase 1 [Drosophila melanogaster]	1	2
219	elongation factor 1 beta, isoform C [Drosophila melanogaster]	0	1
226	uncharacterized protein Dmel_CG13364 [Drosophila melanogaster]	0	2
227	Cluster of Rac1, isoform B [Drosophila melanogaster] (NP_001261247.1)	0	0
229	uncharacterized protein Dmel_CG11876, isoform A [Drosophila melanogaster]	0	2
231	atilla, isoform C [Drosophila melanogaster]	0	2
235	CG5525 [Drosophila melanogaster]	0	2

## Sheet: Normalized WT v deltaSAM
Figure 1-Source Data 3
Values for total spectrum counts normalized to levels of GNU spectrum counts in each replicate sample.
	Total spectrum count normalized to GNU protein in each sample.
Protein	gnu-wt-gfp		gnu-deltaSAM-gfp
Cluster of giant nuclei [Drosophila melanogaster] (NP_648726.1)	1	1	1	1
Cluster of ribosomal protein S27A [Drosophila melanogaster] (NP_476778.1)	0.219101	0.117318	0.266055	0.177632
ribosomal protein S27A [Drosophila melanogaster]	0.196629	0.111732	0.211009	0.177632
ribosomal protein L40, isoform B [Drosophila melanogaster]	0.174157	0.0446927	0.174312	0.105263
Ubiquitin-63E, isoform D [Drosophila melanogaster]	0	0	0	0
ribosomal protein S3, isoform B [Drosophila melanogaster]	0.0786517	0.301676	0.0733945	0.236842
ribosomal protein S25, isoform B [Drosophila melanogaster]	0.0449438	0.0949721	0.119266	0.131579
Cluster of twins, isoform I [Drosophila melanogaster] (NP_001287269.1)	0.0505618	0.217877	0.12844	0.605263
twins, isoform I [Drosophila melanogaster]*	0.0505618*	0.2178771*	0.12844037*	0.60526316*
twins, isoform H [Drosophila melanogaster]*	0.04494382*	0.20670391*	0.12844037*	0.55921053*
uncharacterized protein Dmel_CG33308 [Drosophila melanogaster]	0.011236	0.0223464	0.00917431	0.00657895
ribosomal protein L38, isoform B [Drosophila melanogaster]	0.0168539	0.0949721	0.0733945	0.0855263
uncharacterized protein Dmel_CG34447, isoform B [Drosophila melanogaster]	0	0	0	0
CG5665, isoform C [Drosophila melanogaster]	0	0	0	0
CG5162, isoform B [Drosophila melanogaster]	0	0	0	0
ribosomal protein L22 [Drosophila melanogaster]	0.0224719	0.122905	0.0458716	0.125
ribosomal protein L29, isoform D [Drosophila melanogaster]	0.0505618	0.0335196	0.137615	0.0657895
twenty-four, isoform N [Drosophila melanogaster]	0.0337079	0.357542	0.0458716	0.296053
Cluster of bicaudal C, isoform B [Drosophila melanogaster] (NP_723948.1)	0.0730337	0.513966	0	0.00657895
bicaudal C, isoform B [Drosophila melanogaster]*	0.07303371*	0.51396648*	0*	0.00657895*
bicaudal C, isoform D [Drosophila melanogaster]*	0.05617978*	0.46368715*	0*	0*
eukaryotic translation initiation factor 4G, isoform B [Drosophila melanogaster]	0.0168539	0.0446927	0	0.0855263
Cluster of ypsilon schachtel, isoform B [Drosophila melanogaster] (NP_001246730.1)	0.0617977	0.223464	0.0183486	0.25
ypsilon schachtel, isoform B [Drosophila melanogaster]*	0.06179775*	0.22346369*	0.01834862*	0.21710526*
ypsilon schachtel, isoform A [Drosophila melanogaster]*	0.06179775*	0.20111732*	0.01834862*	0.23026316*
Cluster of protein phosphatase 2A at 29B, isoform A [Drosophila melanogaster] (NP_001027227.1)	0.0224719	0.150838	0.0642202	0.342105
protein phosphatase 2A at 29B, isoform A [Drosophila melanogaster]*	0.02247191*	0.15083799*	0.06422018*	0.34210526*
protein phosphatase 2A at 29B, isoform D [Drosophila melanogaster]*	0.02247191*	0.1452514*	0.06422018*	0.33552632*
ribosomal protein L24, isoform C [Drosophila melanogaster]	0.00561798	0.0167598	0.0275229	0.0131579
ribosomal protein L7A, isoform F [Drosophila melanogaster]	0.0168539	0.0670391	0.0458716	0.111842
CG3800, isoform B [Drosophila melanogaster]	0.0168539	0.0726257	0.0458716	0.105263
Cluster of alpha-Tubulin at 84B [Drosophila melanogaster] (NP_476772.1)	0.0337079	0.100559	0.0642202	0.0526316
alpha-Tubulin at 85E [Drosophila melanogaster]	0.0224719	0.0670391	0.0458716	0.0328947
ribosomal protein S8, isoform G [Drosophila melanogaster]	0.0337079	0.0837989	0.0642202	0.111842
fibrillarin [Drosophila melanogaster]	0.00561798	0.106145	0	0.0328947
ribosomal protein S14b, isoform B [Drosophila melanogaster]	0.0505618	0.117318	0.0183486	0.0855263
ribosomal protein S27, isoform B [Drosophila melanogaster]	0.0337079	0.100559	0.0458716	0.0657895
Cluster of heat shock protein 68 [Drosophila melanogaster] (NP_524474.1)	0.0393258	0.0446927	0.0733945	0.0921053
Heat-shock-protein-70Ab [Drosophila melanogaster]*	0*	0*	0*	0*
Heat-shock-protein-70Ba [Drosophila melanogaster]*	0*	0*	0*	0.09210526*
ribosomal protein S3A, isoform F [Drosophila melanogaster]	0.0337079	0.0558659	0.0366973	0.0526316
ribosomal protein S7, isoform E [Drosophila melanogaster]	0.0337079	0.0614525	0.0183486	0.0526316
ribosomal protein S19a, isoform E [Drosophila melanogaster]	0.011236	0.0502793	0.0366973	0.0394737
heat shock protein 27, isoform B [Drosophila melanogaster]	0.0168539	0.0502793	0.0733945	0.0789474
ribosomal protein S18, isoform B [Drosophila melanogaster]	0.011236	0.0335196	0.0458716	0.0263158
ribosomal protein S23, isoform B [Drosophila melanogaster]	0.0617977	0.0391061	0.0917431	0.0394737
ribosomal protein L8, isoform B [Drosophila melanogaster]	0.00561798	0.0446927	0.0183486	0.105263
microtubule star, isoform C [Drosophila melanogaster]	0.00561798	0.0558659	0.0458716	0.276316
alpha-Tubulin at 67C [Drosophila melanogaster]	0.011236	0.0670391	0.00917431	0.0723684
ribosomal protein L4 [Drosophila melanogaster]	0.00561798	0.0726257	0	0.0986842
Ataxin-2, isoform B [Drosophila melanogaster]	0.0337079	0.111732	0.0550459	0.151316
Cluster of ribosomal protein S11, isoform C [Drosophila melanogaster] (NP_725114.1)	0.0393258	0.0391061	0.0275229	0.0394737
ribosomal protein S11, isoform C [Drosophila melanogaster]	0.0393258	0.0391061	0.0275229	0.0394737
ribosomal protein S11, isoform B [Drosophila melanogaster]	0.0337079	0.0391061	0.0275229	0.0328947
ribosomal protein L10, isoform E [Drosophila melanogaster]	0.0168539	0.0614525	0.0275229	0.0526316
Cluster of glyceraldehyde 3 phosphate dehydrogenase 2, isoform C [Drosophila melanogaster] (NP_001259584.1)	0	0.0223464	0.00917431	0.0263158
glyceraldehyde 3 phosphate dehydrogenase 2, isoform C [Drosophila melanogaster]	0	0.0223464	0.00917431	0.0263158
glyceraldehyde 3 phosphate dehydrogenase 1, isoform B [Drosophila melanogaster]	0	0.0111732	0.00917431	0.0131579
heat shock protein cognate 2 [Drosophila melanogaster]	0.0393258	0	0.0550459	0
ribosomal protein L27A, isoform D [Drosophila melanogaster]	0.0168539	0.0335196	0.0275229	0.0197368
pyruvate kinase, isoform A [Drosophila melanogaster]	0.00561798	0.0558659	0	0.0592105
ribosomal protein S16, isoform B [Drosophila melanogaster]	0.0337079	0.0614525	0.0183486	0.0263158
ribosomal protein L23A [Drosophila melanogaster]	0.00561798	0.0335196	0.0183486	0.0592105
heat shock protein 83, isoform B [Drosophila melanogaster]	0.011236	0.00558659	0.0183486	0.0263158
ribosomal protein S6, isoform B [Drosophila melanogaster]	0.0224719	0.0446927	0.0183486	0.0460526
ribosomal protein L28, isoform G [Drosophila melanogaster]	0.0168539	0.027933	0.0275229	0.0394737
ribosomal protein L10Ab, isoform A [Drosophila melanogaster]	0.0168539	0.0391061	0.00917431	0.0526316
heat shock protein 26, isoform B [Drosophila melanogaster]	0.011236	0.0446927	0.0458716	0.0723684
CG2233 [Drosophila melanogaster]	0	0.00558659	0	0
glycogen synthase, isoform A [Drosophila melanogaster]	0.011236	0.0167598	0.0275229	0.0263158
ribosomal protein S20 [Drosophila melanogaster]	0.011236	0.0391061	0.0275229	0.0723684
14-3-3zeta, isoform F [Drosophila melanogaster]	0.00561798	0.0111732	0.0183486	0
ribosomal protein L18, isoform C [Drosophila melanogaster]	0.0168539	0.0502793	0	0.0789474
ribosomal protein L7, isoform B [Drosophila melanogaster]	0	0.0167598	0.00917431	0.0394737
bellwether [Drosophila melanogaster]	0.00561798	0.0167598	0.00917431	0.00657895
Cluster of histone H4 [Drosophila melanogaster] (NP_001027382.1)	0.00561798	0.027933	0.0275229	0.0394737
histone H4 [Drosophila melanogaster]	0.00561798	0.027933	0.0275229	0.0394737
histone H4 replacement, isoform D [Drosophila melanogaster]	0.00561798	0.027933	0.0275229	0.0394737
Cluster of ribosomal protein L34b, isoform D [Drosophila melanogaster] (NP_001287250.1)	0.00561798	0.0111732	0.00917431	0.0394737
ribosomal protein L34b, isoform D [Drosophila melanogaster]	0.00561798	0.0111732	0.00917431	0.0328947
ribosomal protein L34a, isoform C [Drosophila melanogaster]	0	0.00558659	0	0.0263158
tropomyosin 2, isoform G [Drosophila melanogaster]	0.0168539	0	0.00917431	0.0131579
ribosomal protein L6, isoform B [Drosophila melanogaster]	0.011236	0.0111732	0.00917431	0.0460526
rasputin, isoform G [Drosophila melanogaster]	0	0.0837989	0	0.111842
ribosomal protein L13, isoform C [Drosophila melanogaster]	0.011236	0.027933	0.00917431	0.0263158
Cluster of papilin, isoform E [Drosophila melanogaster] (NP_788752.2)	0	0	0	0
papilin, isoform E [Drosophila melanogaster]	0	0	0	0
papilin, isoform G [Drosophila melanogaster]	0	0	0	0
ribosomal protein L14 [Drosophila melanogaster]	0.0168539	0.0335196	0.00917431	0.0460526
ribosomal protein L37A, isoform C [Drosophila melanogaster]	0.0168539	0.0335196	0.0458716	0.0328947
ribosomal protein S9, isoform E [Drosophila melanogaster]	0.00561798	0.0111732	0.0183486	0.0131579
Ran, isoform D [Drosophila melanogaster]	0	0.027933	0.00917431	0.0197368
Chain C, Porcine E-Trypsin	0.011236	0.0223464	0.00917431	0.0328947
ribosomal protein S17 [Drosophila melanogaster]	0.011236	0.0335196	0.0275229	0.0394737
ribosomal protein S29, isoform B [Drosophila melanogaster]	0.00561798	0.0111732	0.00917431	0.00657895
megalin, isoform E [Drosophila melanogaster]	0	0	0	0
Cluster of heat shock protein 60A, isoform B [Drosophila melanogaster] (NP_727489.1)	0	0	0	0.00657895
heat shock protein 60A, isoform B [Drosophila melanogaster]	0	0	0	0.00657895
heat shock protein 60C, isoform B [Drosophila melanogaster]	0	0	0	0
ribosomal protein L19, isoform B [Drosophila melanogaster]	0	0.0391061	0.00917431	0.0526316
Cluster of Rab35, isoform D [Drosophila melanogaster] (NP_001259739.1)	0.00561798	0	0.00917431	0
Rab35, isoform D [Drosophila melanogaster]	0.00561798	0	0.00917431	0
Rab10 [Drosophila melanogaster]	0.00561798	0	0.00917431	0
Rab1 [Drosophila melanogaster]	0.00561798	0	0.00917431	0
Rab8, isoform C [Drosophila melanogaster]	0.00561798	0	0	0
Rab26, isoform E [Drosophila melanogaster]	0	0	0	0
Rab14, isoform B [Drosophila melanogaster]	0	0	0	0
Rab26, isoform G [Drosophila melanogaster]	0	0	0	0
Rab4, isoform A [Drosophila melanogaster]	0	0	0	0
Rab3 [Drosophila melanogaster]	0	0	0	0
belphegor, isoform B [Drosophila melanogaster]	0.011236	0.0782123	0	0.0263158
ribosomal protein L26, isoform C [Drosophila melanogaster]	0.011236	0.00558659	0	0.00657895
ribosomal protein L12, isoform C [Drosophila melanogaster]	0.011236	0.0335196	0.0366973	0.0328947
ribosomal protein L27, isoform D [Drosophila melanogaster]	0.00561798	0.0223464	0.00917431	0.0197368
ribosomal protein L18A [Drosophila melanogaster]	0.00561798	0.0111732	0	0.00657895
abnormal spindle [Drosophila melanogaster]	0.011236	0.0167598	0.00917431	0.0263158
Cluster of tropomyosin 1, isoform O [Drosophila melanogaster] (NP_732001.3)	0.00561798	0	0.00917431	0.00657895
tropomyosin 1, isoform O [Drosophila melanogaster]	0.00561798	0	0.00917431	0.00657895
tropomyosin 1, isoform E [Drosophila melanogaster]	0.00561798	0	0.00917431	0
tropomyosin 1, isoform H [Drosophila melanogaster]	0.00561798	0	0	0
tropomyosin 1, isoform R [Drosophila melanogaster]	0	0	0	0
ribosomal protein S10b, isoform E [Drosophila melanogaster]	0	0.0111732	0.00917431	0.0131579
ribosomal protein L3, isoform H [Drosophila melanogaster]	0	0.0111732	0	0.0131579
14-3-3epsilon, isoform A [Drosophila melanogaster]	0.00561798	0.00558659	0.0183486	0
ubiquitin activating enzyme 5 [Drosophila melanogaster]	0	0.027933	0	0.0328947
ribosomal protein L15, isoform I [Drosophila melanogaster]	0	0.0111732	0	0.0131579
eukaryotic initiation factor 4E, isoform I [Drosophila melanogaster]	0.00561798	0.0391061	0	0.0394737
ribosomal protein S5b, isoform A [Drosophila melanogaster]	0.00561798	0.0223464	0.0183486	0.0263158
ribosomal protein S13, isoform C [Drosophila melanogaster]	0	0.0335196	0.0183486	0.00657895
ribosomal protein L23 [Drosophila melanogaster]	0	0.0391061	0.0183486	0.0328947
CG5726 [Drosophila melanogaster]	0	0.0335196	0	0.0526316
Tcp1-like, isoform B [Drosophila melanogaster]	0.0168539	0.0335196	0	0.00657895
ribosomal protein L36A, isoform B [Drosophila melanogaster]	0.00561798	0.00558659	0.0183486	0.0197368
Cluster of G protein alpha s subunit, isoform D [Drosophila melanogaster] (NP_001163283.1)	0	0	0	0
G protein alpha s subunit, isoform D [Drosophila melanogaster]	0	0	0	0
G protein alpha o subunit, isoform H [Drosophila melanogaster]	0	0	0	0
G protein alpha i subunit [Drosophila melanogaster]	0	0	0	0
Cluster of ribosomal protein L13A, isoform B [Drosophila melanogaster] (NP_649560.1)	0	0	0	0.00657895
ribosomal protein L13A, isoform B [Drosophila melanogaster]	0	0	0	0.00657895
ribosomal protein L13A, isoform C [Drosophila melanogaster]	0	0	0	0
zipper, isoform D [Drosophila melanogaster]	0.011236	0	0.00917431	0.0592105
ribosomal protein S26, isoform E [Drosophila melanogaster]	0.00561798	0.0335196	0.0275229	0.0131579
Cluster of Fmr1, isoform G [Drosophila melanogaster] (NP_001247017.1)	0	0.0335196	0	0.0460526
Fmr1, isoform G [Drosophila melanogaster]	0	0.0335196	0	0.0460526
Fmr1, isoform H [Drosophila melanogaster]	0	0.0167598	0	0.0328947
CG4586 [Drosophila melanogaster]	0.011236	0.0502793	0.00917431	0.0263158
ribosomal protein S2, isoform C [Drosophila melanogaster]	0	0.0391061	0	0.0328947
Rab11, isoform A [Drosophila melanogaster]	0	0	0	0
ribosomal protein L30, isoform E [Drosophila melanogaster]	0.00561798	0.0223464	0.0183486	0.0263158
histone H2B [Drosophila melanogaster]	0.00561798	0.0167598	0.0183486	0.00657895
ribosomal protein L32, isoform C [Drosophila melanogaster]	0	0.0167598	0	0.0328947
chorion protein 36 [Drosophila melanogaster]	0.00561798	0.00558659	0.0458716	0.0263158
yellow-g [Drosophila melanogaster]	0	0	0.100917	0
uncharacterized protein Dmel_CG17018, isoform C [Drosophila melanogaster]	0.0168539	0.0167598	0.0183486	0.0263158
ribosomal protein S4, isoform C [Drosophila melanogaster]	0.00561798	0.0111732	0.0183486	0.0197368
ribosomal protein L11, isoform B [Drosophila melanogaster]	0	0.027933	0.00917431	0.0328947
casein kappa [Bos taurus]	0	0	0.00917431	0.0131579
rudimentary, isoform E [Drosophila melanogaster]	0	0.0167598	0.00917431	0.0197368
heterogeneous nuclear ribonucleoprotein at 27C, isoform H [Drosophila melanogaster]	0	0.0614525	0	0.0394737
Cluster of eukaryotic initiation factor 4a, isoform F [Drosophila melanogaster] (NP_001260117.1)	0	0.0111732	0.0183486	0.00657895
eukaryotic initiation factor 4a, isoform F [Drosophila melanogaster]	0	0.0111732	0.00917431	0.00657895
eIF4AIII [Drosophila melanogaster]	0	0.00558659	0.00917431	0.00657895
Cluster of Glutamyl-prolyl-tRNA synthetase, isoform A [Drosophila melanogaster] (NP_524471.2)	0	0.0167598	0	0
Glutamyl-prolyl-tRNA synthetase, isoform A [Drosophila melanogaster]	0	0.0167598	0	0
Glutamyl-prolyl-tRNA synthetase, isoform B [Drosophila melanogaster]	0	0.0111732	0	0
Cluster of sterol carrier protein X-related thiolase [Drosophila melanogaster] (NP_524715.2)	0.011236	0.0111732	0.0275229	0.0394737
sterol carrier protein X-related thiolase [Drosophila melanogaster]	0.011236	0.0111732	0.0275229	0.0394737
uncharacterized protein Dmel_CG17597, isoform B [Drosophila melanogaster]	0	0	0	0
IGF-II mRNA-binding protein, isoform K [Drosophila melanogaster]	0.00561798	0.0223464	0	0.0197368
uncharacterized protein Dmel_CG17754, isoform G [Drosophila melanogaster]	0	0.00558659	0	0
malic enzyme, isoform B [Drosophila melanogaster]	0	0	0.0733945	0.00657895
uncharacterized protein Dmel_CG12262 [Drosophila melanogaster]	0	0.00558659	0	0.0394737
lost [Drosophila melanogaster]	0	0.00558659	0	0.0328947
ribosomal protein L21, isoform C [Drosophila melanogaster]	0	0.0167598	0	0.00657895
Cluster of wing blister, isoform G [Drosophila melanogaster] (NP_476790.3-DECOY)	0	0	0	0
wing blister, isoform G [Drosophila melanogaster]	0	0	0	0
wing blister, isoform F [Drosophila melanogaster]	0	0	0	0
GTPase activating protein and centrosome-associated, isoform B [Drosophila melanogaster]	0.00561798	0.027933	0	0
alpha spectrin, isoform B [Drosophila melanogaster]	0	0	0	0.0197368
ribosomal protein L17, isoform E [Drosophila melanogaster]	0	0.00558659	0.0275229	0.00657895
ribosomal protein S5a, isoform D [Drosophila melanogaster]	0	0.0223464	0.00917431	0.0131579
Cluster of adenosylhomocysteinase like 1 [Drosophila melanogaster] (NP_647746.1)	0	0	0	0
adenosylhomocysteinase like 1 [Drosophila melanogaster]	0	0	0	0
adenosylhomocysteinase like 2, isoform D [Drosophila melanogaster]	0	0	0	0
TER94, isoform E [Drosophila melanogaster]	0	0	0	0
mitochondrial trifunctional protein alpha subunit, isoform A [Drosophila melanogaster]	0.00561798	0.0111732	0.00917431	0.0197368
glycoprotein 93 [Drosophila melanogaster]	0	0	0	0
Cluster of lipophorin receptor 1, isoform K [Drosophila melanogaster] (NP_001097934.2)	0	0	0.0183486	0
lipophorin receptor 1, isoform K [Drosophila melanogaster]	0	0	0.0183486	0
lipophorin receptor 1, isoform S [Drosophila melanogaster]	0	0	0	0
heat shock protein cognate 5, isoform B [Drosophila melanogaster]	0	0	0	0.0263158
non-claret disjunctional, isoform B [Drosophila melanogaster]	0	0.027933	0	0.0328947
regulatory particle triple-A ATPase 6 [Drosophila melanogaster]	0	0.0111732	0	0.00657895
ribosomal protein L9, isoform C [Drosophila melanogaster]	0.00561798	0.0167598	0	0
Rab7, isoform C [Drosophila melanogaster]	0	0	0	0
chorion protein b at 7F, isoform A [Drosophila melanogaster]	0	0	0.0183486	0
Gamma-interferon-inducible lysosomal thiol reductase 1 [Drosophila melanogaster]	0.00561798	0.00558659	0.0275229	0.00657895
lethal (1) G0156, isoform C [Drosophila melanogaster]	0	0.0111732	0	0.0197368
Lon protease, isoform C [Drosophila melanogaster]	0	0.027933	0	0
clathrin heavy chain, isoform G [Drosophila melanogaster]	0	0	0	0
deadhead, isoform B [Drosophila melanogaster]	0.00561798	0	0.0366973	0.0131579
spindle assembly abnormal 4 [Drosophila melanogaster]	0	0.027933	0	0
Cluster of G protein alpha q subunit, isoform D [Drosophila melanogaster] (NP_725196.1)	0	0	0	0
G protein alpha q subunit, isoform D [Drosophila melanogaster]	0	0	0	0
uncharacterized protein Dmel_CG30054, isoform E [Drosophila melanogaster]	0	0	0	0
uncharacterized protein Dmel_CG30054, isoform F [Drosophila melanogaster]	0	0	0	0
chorion protein a at 7F [Drosophila melanogaster]	0	0	0.0917431	0
uncharacterized protein Dmel_CG15293, isoform C [Drosophila melanogaster]	0	0.00558659	0	0
belle, isoform B [Drosophila melanogaster]	0	0	0	0
beta spectrin, isoform A [Drosophila melanogaster]	0	0	0	0
ribosomal protein L35A [Drosophila melanogaster]	0	0.00558659	0	0.00657895
yellow-g2 [Drosophila melanogaster]	0	0	0.0642202	0
ribosomal protein L36, isoform E [Drosophila melanogaster]	0	0	0	0.00657895
succinate dehydrogenase, subunit A (flavoprotein), isoform C [Drosophila melanogaster]	0	0	0	0
chorion protein 18 [Drosophila melanogaster]	0	0.0111732	0.0825688	0
uncharacterized protein Dmel_CG30069 [Drosophila melanogaster]	0	0	0.0183486	0.00657895
Rab5, isoform I [Drosophila melanogaster]	0.00561798	0	0.00917431	0
IGH1M_MOUSE RecName: Full=Ig gamma-1 chain C region, membrane-bound form	0	0.00558659	0	0.00657895
La related protein, isoform H [Drosophila melanogaster]	0	0.0223464	0	0
swallow [Drosophila melanogaster]	0.0168539	0	0.00917431	0.00657895
wispy, isoform B [Drosophila melanogaster]	0.00561798	0.0111732	0	0.00657895
ribosomal protein L31, isoform C [Drosophila melanogaster]	0.00561798	0.0111732	0.00917431	0
argonaute 2, isoform B [Drosophila melanogaster]	0.011236	0.00558659	0	0.00657895
Isoleucyl-tRNA synthetase, isoform D [Drosophila melanogaster]	0.00561798	0.0223464	0	0
Rap1 GTPase, isoform C [Drosophila melanogaster]	0	0	0	0
CG8507 [Drosophila melanogaster]	0	0.0111732	0	0.0197368
transforming acidic coiled-coil protein, isoform N [Drosophila melanogaster]	0.011236	0	0.00917431	0
ribosomal protein S24 [Drosophila melanogaster]	0	0.0167598	0.00917431	0.0131579
gamma-Tubulin at 37C, isoform B [Drosophila melanogaster]	0	0.0111732	0.00917431	0.00657895
female-specific independent of transformer [Drosophila melanogaster]	0	0.00558659	0	0.00657895
T-cp1zeta [Drosophila melanogaster]	0	0.00558659	0	0
CG8036, isoform D [Drosophila melanogaster]	0	0	0	0.00657895
peroxin 14 [Drosophila melanogaster]	0	0.0111732	0.00917431	0.0131579
regulatory particle triple-A ATPase 1 [Drosophila melanogaster]	0	0	0	0
uncharacterized protein Dmel_CG13084 [Drosophila melanogaster]	0	0	0.0366973	0
bonus, isoform B [Drosophila melanogaster]	0	0.00558659	0.00917431	0.0131579
uncharacterized protein Dmel_CG15735 [Drosophila melanogaster]	0.00561798	0.00558659	0	0.0131579
uncharacterized protein Dmel_CG13364 [Drosophila melanogaster]	0	0	0	0
Lysyl-tRNA synthetase, isoform C [Drosophila melanogaster]	0	0.0111732	0	0.00657895
Grip71 [Drosophila melanogaster]	0	0.0111732	0	0.0131579
elongation factor 1 beta, isoform C [Drosophila melanogaster]	0	0	0	0
Aspartyl-tRNA synthetase, isoform B [Drosophila melanogaster]	0	0.0111732	0	0
roadkill, isoform C [Drosophila melanogaster]	0.00561798	0.0111732	0	0.0131579
ADP ribosylation factor at 102F, isoform B [Drosophila melanogaster]	0.00561798	0	0	0

## Sheet: Normalized WT v 9A
Figure 1-Source Data 3
Values for total spectrum counts normalized to levels of GNU spectrum counts in each replicate sample.
	Total spectrum count normalized to GNU protein in each sample.
	Gnu-WT-GFP		Gnu-9A-GFP
Cluster of giant nuclei [Drosophila melanogaster] (NP_648726.1)	1	1	1	1
giant nuclei [Drosophila melanogaster]	1	1	0.622222	0.703704
GNU_9A protein[Drosophila melanogaster]	0	0.798883	1	1
Cluster of ribosomal protein S27A [Drosophila melanogaster] (NP_476778.1)	0.219101	0.117318	0.3	0.419753
ribosomal protein S27A [Drosophila melanogaster]	0.196629	0.111732	0.244444	0.308642
ribosomal protein L40, isoform B [Drosophila melanogaster]	0.174157	0.0446927	0.255556	0.296296
Ubiquitin-63E, isoform D [Drosophila melanogaster]	0	0	0	0
Cluster of heat shock protein cognate 4, isoform G [Drosophila melanogaster] (NP_001262586.1)	0.162921	0.256983	0.355556	0.419753
heat shock protein cognate 4, isoform G [Drosophila melanogaster]	0.151685	0.256983	0.344444	0.419753
heat shock protein cognate 1, isoform A [Drosophila melanogaster]	0.0393258	0.0446927	0.0666667	0.0864198
Cluster of actin 5C, isoform E [Drosophila melanogaster] (NP_001284915.1)	0.146067	0.117318	0.333333	0.308642
actin 5C, isoform E [Drosophila melanogaster]	0.140449	0.106145	0.333333	0.308642
actin 57B [Drosophila melanogaster]	0.106742	0.0893855	0.266667	0.259259
actin 88F [Drosophila melanogaster]	0.106742	0.0837989	0.266667	0.259259
actin 79B, isoform B [Drosophila melanogaster]	0.106742	0.0837989	0.2	0.197531
Actin-related protein 53D [Drosophila melanogaster]	0	0	0.0111111	0
ENO1_YEAST Enolase 1 - Saccharomyces cerevisiae (Baker's yeast).*	0.04494382*	1.13407821*	0.02222222*	0.03703704*
ribosomal protein S3, isoform B [Drosophila melanogaster]	0.0786517	0.301676	0.311111	0.469136
heat shock 70-kDa protein cognate 3, isoform E [Drosophila melanogaster]	0.140449	0.162011	0.155556	0.197531
ribosomal protein S25, isoform B [Drosophila melanogaster]	0.0449438	0.0949721	0.111111	0.395062
Cluster of twins, isoform I [Drosophila melanogaster] (NP_001287269.1)	0.0505618	0.217877	0.111111	0.037037
twins, isoform I [Drosophila melanogaster]	0.0505618	0.217877	0.111111	0.037037
twins, isoform H [Drosophila melanogaster]	0.0449438	0.206704	0.111111	0.037037
uncharacterized protein Dmel_CG33308 [Drosophila melanogaster]	0.011236	0.0223464	0	0
Cluster of beta-Tubulin at 56D, isoform B [Drosophila melanogaster] (NP_523795.2)	0.0449438	0.184358	0.122222	0.259259
beta-Tubulin at 56D, isoform B [Drosophila melanogaster]	0.0449438	0.156425	0.122222	0.259259
beta-Tubulin at 85D [Drosophila melanogaster]	0.0168539	0.0726257	0.0444444	0.0864198
beta-Tubulin at 60D, isoform A [Drosophila melanogaster]	0.0168539	0.0670391	0.0444444	0.0987654
beta-Tubulin at 97EF, isoform B [Drosophila melanogaster]	0	0	0	0
yolk protein 2, isoform B [Drosophila melanogaster]	0.0280899	0.0558659	0.1	0.333333
ribosomal protein L38, isoform B [Drosophila melanogaster]	0.0168539	0.0949721	0.0555556	0.222222
Cluster of yolk protein 3, isoform B [Drosophila melanogaster] (NP_001285228.1)	0.0393258	0.0446927	0.0888889	0.17284
yolk protein 3, isoform B [Drosophila melanogaster]	0.0393258	0.0446927	0.0888889	0.17284
uncharacterized protein Dmel_CG34447, isoform B [Drosophila melanogaster]	0	0	0	0
CG5665, isoform C [Drosophila melanogaster]	0	0	0	0
CG5162, isoform B [Drosophila melanogaster]	0	0	0	0
yolk protein 1, isoform B [Drosophila melanogaster]	0.00561798	0.0502793	0.111111	0.222222
ribosomal protein L22 [Drosophila melanogaster]	0.0224719	0.122905	0.355556	0.308642
poly(A) binding protein, isoform C [Drosophila melanogaster]	0.0730337	0.284916	0.122222	0.0493827
Cluster of defective chorion 1, isoform G [Drosophila melanogaster] (NP_001245569.1)	0.00561798	0.0111732	0.0222222	0.580247
defective chorion 1, isoform G [Drosophila melanogaster]	0.00561798	0.0111732	0.0222222	0.580247
defective chorion 1, isoform E [Drosophila melanogaster]	0.00561798	0.0111732	0.0222222	0.580247
ribosomal protein L29, isoform D [Drosophila melanogaster]	0.0505618	0.0335196	0.111111	0.333333
twenty-four, isoform N [Drosophila melanogaster]	0.0337079	0.357542	0.1	0
Cluster of bicaudal C, isoform B [Drosophila melanogaster] (NP_723948.1)	0.0730337	0.513966	0.0555556	0
bicaudal C, isoform B [Drosophila melanogaster]	0.0730337	0.513966	0.0555556	0
bicaudal C, isoform D [Drosophila melanogaster]	0.0561798	0.463687	0.0333333	0
eukaryotic translation initiation factor 4G, isoform B [Drosophila melanogaster]	0.0168539	0.0446927	0.0777778	0.0123457
Cluster of stress-sensitive B, isoform E [Drosophila melanogaster] (NP_001285090.1)	0.0449438	0.0837989	0.0777778	0.123457
stress-sensitive B, isoform E [Drosophila melanogaster]	0.0449438	0.0837989	0.0777778	0.123457
adenine nucleotide translocase 2, isoform C [Drosophila melanogaster]	0.00561798	0.0167598	0	0.0246914
Cluster of ypsilon schachtel, isoform B [Drosophila melanogaster] (NP_001246730.1)	0.0617977	0.223464	0.111111	0.0123457
ypsilon schachtel, isoform B [Drosophila melanogaster]	0.0617977	0.223464	0.111111	0.0123457
ypsilon schachtel, isoform A [Drosophila melanogaster]	0.0617977	0.201117	0.111111	0.0123457
Cluster of protein phosphatase 2A at 29B, isoform A [Drosophila melanogaster] (NP_001027227.1)	0.0224719	0.150838	0.0888889	0.0493827
protein phosphatase 2A at 29B, isoform A [Drosophila melanogaster]	0.0224719	0.150838	0.0888889	0.0493827
protein phosphatase 2A at 29B, isoform D [Drosophila melanogaster]	0.0224719	0.145251	0.0888889	0.0493827
Cluster of elongation factor 1alpha48D, isoform E [Drosophila melanogaster] (NP_001286322.1)	0.0393258	0.0335196	0.0444444	0.0617284
elongation factor 1alpha48D, isoform E [Drosophila melanogaster]	0.0393258	0.0335196	0.0444444	0.0617284
elongation factor 1alpha100E, isoform C [Drosophila melanogaster]	0.0393258	0.027933	0.0444444	0.0617284
ribosomal protein L24, isoform C [Drosophila melanogaster]	0.00561798	0.0167598	0.0222222	0.0246914
ribosomal protein L7A, isoform F [Drosophila melanogaster]	0.0168539	0.0670391	0.177778	0.222222
Cluster of myosin heavy chain, isoform U [Drosophila melanogaster] (NP_001246051.1)	0.00561798	0.0111732	0	0
myosin heavy chain, isoform U [Drosophila melanogaster]	0.00561798	0.0111732	0	0
myosin heavy chain, isoform O [Drosophila melanogaster]	0.00561798	0.0111732	0	0
myosin heavy chain, isoform F [Drosophila melanogaster]	0	0.0111732	0	0
myosin heavy chain, isoform P [Drosophila melanogaster]	0.00561798	0.0111732	0	0
Cluster of trailer hitch, isoform C [Drosophila melanogaster] (NP_001261770.1)	0.0393258	0.206704	0.0555556	0.0617284
trailer hitch, isoform C [Drosophila melanogaster]	0.0393258	0.206704	0.0555556	0.0617284
trailer hitch, isoform D [Drosophila melanogaster]	0.0337079	0.189944	0.0555556	0.0617284
CG3800, isoform B [Drosophila melanogaster]	0.0168539	0.0726257	0.0222222	0.135802
Cluster of alpha-Tubulin at 84B [Drosophila melanogaster] (NP_476772.1)	0.0337079	0.100559	0.0666667	0.123457
alpha-Tubulin at 84B [Drosophila melanogaster]	0.0337079	0.100559	0.0666667	0.123457
alpha-Tubulin at 85E [Drosophila melanogaster]	0.0224719	0.0670391	0.0555556	0.0864198
ribosomal protein S8, isoform G [Drosophila melanogaster]	0.0337079	0.0837989	0.111111	0.123457
fibrillarin [Drosophila melanogaster]	0.00561798	0.106145	0.0111111	0.0246914
ribosomal protein S14b, isoform B [Drosophila melanogaster]	0.0505618	0.117318	0.155556	0.17284
ribosomal protein S27, isoform B [Drosophila melanogaster]	0.0337079	0.100559	0.111111	0.135802
Cluster of heat shock protein 68 [Drosophila melanogaster] (NP_524474.1)	0.0393258	0.0446927	0.0777778	0.0864198
heat shock protein 68 [Drosophila melanogaster]	0.0393258	0.0446927	0	0.0864198
Heat-shock-protein-70Ab [Drosophila melanogaster]	0	0	0	0
Heat-shock-protein-70Ba [Drosophila melanogaster]	0	0	0	0
ribosomal protein S3A, isoform F [Drosophila melanogaster]	0.0337079	0.0558659	0.0555556	0.0617284
ribosomal protein S7, isoform E [Drosophila melanogaster]	0.0337079	0.0614525	0.0555556	0.111111
ribosomal protein S19a, isoform E [Drosophila melanogaster]	0.011236	0.0502793	0.0222222	0.0740741
heat shock protein 27, isoform B [Drosophila melanogaster]	0.0168539	0.0502793	0.111111	0.197531
ribosomal protein S18, isoform B [Drosophila melanogaster]	0.011236	0.0335196	0.1	0.160494
ribosomal protein S23, isoform B [Drosophila melanogaster]	0.0617977	0.0391061	0.0333333	0.0987654
maternal expression at 31B, isoform A [Drosophila melanogaster]	0.0168539	0.0614525	0.0666667	0.0987654
ribosomal protein L8, isoform B [Drosophila melanogaster]	0.00561798	0.0446927	0.0888889	0.17284
microtubule star, isoform C [Drosophila melanogaster]	0.00561798	0.0558659	0.0333333	0.0123457
alpha-Tubulin at 67C [Drosophila melanogaster]	0.011236	0.0670391	0.0888889	0.0864198
ribosomal protein L4 [Drosophila melanogaster]	0.00561798	0.0726257	0.111111	0.0987654
Ataxin-2, isoform B [Drosophila melanogaster]	0.0337079	0.111732	0.0222222	0
Cluster of ribosomal protein S11, isoform C [Drosophila melanogaster] (NP_725114.1)	0.0393258	0.0391061	0.0444444	0.0987654
ribosomal protein S11, isoform C [Drosophila melanogaster]	0.0393258	0.0391061	0.0444444	0.0987654
ribosomal protein S11, isoform B [Drosophila melanogaster]	0.0337079	0.0391061	0.0333333	0.0617284
ribosomal protein L10, isoform E [Drosophila melanogaster]	0.0168539	0.0614525	0.0666667	0.111111
Cluster of glyceraldehyde 3 phosphate dehydrogenase 2, isoform C [Drosophila melanogaster] (NP_001259584.1)	0	0.0223464	0.0555556	0.0864198
glyceraldehyde 3 phosphate dehydrogenase 2, isoform C [Drosophila melanogaster]	0	0.0223464	0.0555556	0.0740741
glyceraldehyde 3 phosphate dehydrogenase 1, isoform B [Drosophila melanogaster]	0	0.0111732	0.0333333	0.0617284
heat shock protein cognate 2 [Drosophila melanogaster]	0.0393258	0	0.0666667	0.0740741
thioredoxin peroxidase 1, isoform E [Drosophila melanogaster]	0.0280899	0.0446927	0.0555556	0.0864198
ribosomal protein L27A, isoform D [Drosophila melanogaster]	0.0168539	0.0335196	0.0333333	0.0617284
pyruvate kinase, isoform A [Drosophila melanogaster]	0.00561798	0.0558659	0	0.0864198
ribosomal protein S16, isoform B [Drosophila melanogaster]	0.0337079	0.0614525	0.0666667	0.0987654
ribosomal protein L23A [Drosophila melanogaster]	0.00561798	0.0335196	0.0555556	0.0987654
heat shock protein 83, isoform B [Drosophila melanogaster]	0.011236	0.00558659	0.0222222	0.0740741
ribosomal protein S6, isoform B [Drosophila melanogaster]	0.0224719	0.0446927	0.0888889	0.111111
cup, isoform C [Drosophila melanogaster]	0.0280899	0.111732	0.0777778	0.0493827
ribosomal protein L28, isoform G [Drosophila melanogaster]	0.0168539	0.027933	0.0555556	0.0740741
ribosomal protein L10Ab, isoform A [Drosophila melanogaster]	0.0168539	0.0391061	0.0666667	0.0617284
heat shock protein 26, isoform B [Drosophila melanogaster]	0.011236	0.0446927	0.0555556	0.0740741
CG2233 [Drosophila melanogaster]	0	0.00558659	0	0
glycogen synthase, isoform A [Drosophila melanogaster]	0.011236	0.0167598	0	0.0493827
ribosomal protein S20 [Drosophila melanogaster]	0.011236	0.0391061	0.0555556	0.0617284
14-3-3zeta, isoform F [Drosophila melanogaster]	0.00561798	0.0111732	0.0222222	0.0246914
ribosomal protein L18, isoform C [Drosophila melanogaster]	0.0168539	0.0502793	0.0888889	0.0864198
ribosomal protein L7, isoform B [Drosophila melanogaster]	0	0.0167598	0.0777778	0.0864198
bellwether [Drosophila melanogaster]	0.00561798	0.0167598	0.0222222	0.0987654
Cluster of histone H4 [Drosophila melanogaster] (NP_001027382.1)	0.00561798	0.027933	0.0333333	0.0493827
histone H4 [Drosophila melanogaster]	0.00561798	0.027933	0.0333333	0.0493827
histone H4 replacement, isoform D [Drosophila melanogaster]	0.00561798	0.027933	0.0333333	0.0493827
Cluster of ribosomal protein L34b, isoform D [Drosophila melanogaster] (NP_001287250.1)	0.00561798	0.0111732	0.0888889	0.0987654
ribosomal protein L34b, isoform D [Drosophila melanogaster]	0.00561798	0.0111732	0.0888889	0.0987654
ribosomal protein L34a, isoform C [Drosophila melanogaster]	0	0.00558659	0.0333333	0.037037
tropomyosin 2, isoform G [Drosophila melanogaster]	0.0168539	0	0	0
ribosomal protein L6, isoform B [Drosophila melanogaster]	0.011236	0.0111732	0.0666667	0.0864198
rasputin, isoform G [Drosophila melanogaster]	0	0.0837989	0.0555556	0.0123457
ribosomal protein L13, isoform C [Drosophila melanogaster]	0.011236	0.027933	0.0111111	0.0123457
Cluster of papilin, isoform E [Drosophila melanogaster] (NP_788752.2)	0	0	0	0
papilin, isoform E [Drosophila melanogaster]	0	0	0	0
papilin, isoform G [Drosophila melanogaster]	0	0	0	0
ribosomal protein L14 [Drosophila melanogaster]	0.0168539	0.0335196	0.0555556	0.0493827
ribosomal protein L37A, isoform C [Drosophila melanogaster]	0.0168539	0.0335196	0.0111111	0.037037
ribosomal protein S9, isoform E [Drosophila melanogaster]	0.00561798	0.0111732	0.0333333	0.0246914
Ran, isoform D [Drosophila melanogaster]	0	0.027933	0.0222222	0.0864198
Chain C, Porcine E-Trypsin	0.011236	0.0223464	0.0222222	0.0246914
ribosomal protein S17 [Drosophila melanogaster]	0.011236	0.0335196	0.0333333	0.0246914
ribosomal protein S29, isoform B [Drosophila melanogaster]	0.00561798	0.0111732	0	0.0246914
megalin, isoform E [Drosophila melanogaster]	0	0	0	0.0123457
Cluster of heat shock protein 60A, isoform B [Drosophila melanogaster] (NP_727489.1)	0	0	0	0.037037
heat shock protein 60A, isoform B [Drosophila melanogaster]	0	0	0	0.037037
heat shock protein 60C, isoform B [Drosophila melanogaster]	0	0	0	0.0123457
ribosomal protein L19, isoform B [Drosophila melanogaster]	0	0.0391061	0.0777778	0.111111
Cluster of Rab35, isoform D [Drosophila melanogaster] (NP_001259739.1)	0.00561798	0	0.0111111	0.0123457
Rab35, isoform D [Drosophila melanogaster]	0.00561798	0	0	0.0123457
Rab10 [Drosophila melanogaster]	0.00561798	0	0	0
Rab1 [Drosophila melanogaster]	0.00561798	0	0	0
Rab8, isoform C [Drosophila melanogaster]	0.00561798	0	0.0111111	0
Rab26, isoform E [Drosophila melanogaster]	0	0	0.0111111	0.0123457
Rab14, isoform B [Drosophila melanogaster]	0	0	0.0111111	0
Rab26, isoform G [Drosophila melanogaster]	0	0	0	0
Rab4, isoform A [Drosophila melanogaster]	0	0	0	0
Rab3 [Drosophila melanogaster]	0	0	0	0
belphegor, isoform B [Drosophila melanogaster]	0.011236	0.0782123	0.0444444	0.0246914
ribosomal protein L26, isoform C [Drosophila melanogaster]	0.011236	0.00558659	0.1	0.0493827
ribosomal protein L12, isoform C [Drosophila melanogaster]	0.011236	0.0335196	0.0111111	0.0493827
ribosomal protein L27, isoform D [Drosophila melanogaster]	0.00561798	0.0223464	0.0555556	0.0493827
ribosomal protein L18A [Drosophila melanogaster]	0.00561798	0.0111732	0.0666667	0.0617284
abnormal spindle [Drosophila melanogaster]	0.011236	0.0167598	0.0444444	0.0246914
Cluster of tropomyosin 1, isoform O [Drosophila melanogaster] (NP_732001.3)	0.00561798	0	0	0
tropomyosin 1, isoform O [Drosophila melanogaster]	0.00561798	0	0	0
tropomyosin 1, isoform E [Drosophila melanogaster]	0.00561798	0	0	0
tropomyosin 1, isoform H [Drosophila melanogaster]	0.00561798	0	0	0
tropomyosin 1, isoform R [Drosophila melanogaster]	0	0	0	0
ribosomal protein S10b, isoform E [Drosophila melanogaster]	0	0.0111732	0	0.0493827
ribosomal protein L3, isoform H [Drosophila melanogaster]	0	0.0111732	0.0333333	0.0864198
14-3-3epsilon, isoform A [Drosophila melanogaster]	0.00561798	0.00558659	0.0333333	0.037037
ubiquitin activating enzyme 5 [Drosophila melanogaster]	0	0.027933	0	0.0740741
ribosomal protein L15, isoform I [Drosophila melanogaster]	0	0.0111732	0.0666667	0.0740741
eukaryotic initiation factor 4E, isoform I [Drosophila melanogaster]	0.00561798	0.0391061	0.0333333	0
ribosomal protein S5b, isoform A [Drosophila melanogaster]	0.00561798	0.0223464	0.0111111	0.037037
ribosomal protein S13, isoform C [Drosophila melanogaster]	0	0.0335196	0.0333333	0.0246914
ribosomal protein L23 [Drosophila melanogaster]	0	0.0391061	0.0111111	0.037037
CG5726 [Drosophila melanogaster]	0	0.0335196	0.0222222	0
dynein heavy chain 64C, isoform E [Drosophila melanogaster]	0	0	0	0
Cluster of jabba, isoform C [Drosophila melanogaster] (NP_001137703.1)	0.00561798	0.027933	0.0222222	0.037037
jabba, isoform C [Drosophila melanogaster]	0.00561798	0.027933	0.0222222	0.037037
jabba, isoform I [Drosophila melanogaster]	0.00561798	0.0223464	0.0222222	0.037037
Tcp1-like, isoform B [Drosophila melanogaster]	0.0168539	0.0335196	0.0333333	0.0493827
ribosomal protein L36A, isoform B [Drosophila melanogaster]	0.00561798	0.00558659	0	0.0123457
Cluster of ATP synthase, beta subunit, isoform D [Drosophila melanogaster] (NP_001284719.1)	0	0.00558659	0.0111111	0.0123457
ATP synthase, beta subunit, isoform D [Drosophila melanogaster]	0	0.00558659	0.0111111	0.0123457
ATP synthase, beta subunit-like [Drosophila melanogaster]	0	0	0	0
Cluster of G protein alpha s subunit, isoform D [Drosophila melanogaster] (NP_001163283.1)	0	0	0.0111111	0
G protein alpha s subunit, isoform D [Drosophila melanogaster]	0	0	0.0111111	0
G protein alpha o subunit, isoform H [Drosophila melanogaster]	0	0	0.0111111	0
G protein alpha i subunit [Drosophila melanogaster]	0	0	0.0111111	0
concertina, isoform B [Drosophila melanogaster]	0	0	0	0
elongation factor 2, isoform C [Drosophila melanogaster]	0.00561798	0	0.0111111	0.037037
megator, isoform B [Drosophila melanogaster]	0.011236	0.0111732	0	0
Cluster of ribosomal protein L13A, isoform B [Drosophila melanogaster] (NP_649560.1)	0	0	0.0333333	0.037037
ribosomal protein L13A, isoform B [Drosophila melanogaster]	0	0	0.0333333	0.037037
ribosomal protein L13A, isoform C [Drosophila melanogaster]	0	0	0.0111111	0.0123457
zipper, isoform D [Drosophila melanogaster]	0.011236	0	0	0
ribosomal protein S26, isoform E [Drosophila melanogaster]	0.00561798	0.0335196	0	0.0123457
Cluster of Fmr1, isoform G [Drosophila melanogaster] (NP_001247017.1)	0	0.0335196	0.0222222	0
Fmr1, isoform G [Drosophila melanogaster]	0	0.0335196	0.0222222	0
Fmr1, isoform H [Drosophila melanogaster]	0	0.0167598	0.0222222	0
CG4586 [Drosophila melanogaster]	0.011236	0.0502793	0.0111111	0
cysteine proteinase-1, isoform C [Drosophila melanogaster]	0	0.027933	0	0.037037
ribosomal protein S2, isoform C [Drosophila melanogaster]	0	0.0391061	0.0222222	0.0246914
Rab11, isoform A [Drosophila melanogaster]	0	0	0.0111111	0
ribosomal protein L30, isoform E [Drosophila melanogaster]	0.00561798	0.0223464	0.0444444	0.037037
histone H2B [Drosophila melanogaster]	0.00561798	0.0167598	0.0222222	0.037037
ribosomal protein L32, isoform C [Drosophila melanogaster]	0	0.0167598	0.0222222	0.037037
chorion protein 36 [Drosophila melanogaster]	0.00561798	0.00558659	0.0222222	0.037037
yellow-g [Drosophila melanogaster]	0	0	0	0
uncharacterized protein Dmel_CG17018, isoform C [Drosophila melanogaster]	0.0168539	0.0167598	0	0
ribosomal protein S4, isoform C [Drosophila melanogaster]	0.00561798	0.0111732	0.0111111	0.0246914
ribosomal protein L11, isoform B [Drosophila melanogaster]	0	0.027933	0.0222222	0.037037
casein kappa [Bos taurus]	0	0	0.0111111	0.0246914
rudimentary, isoform E [Drosophila melanogaster]	0	0.0167598	0	0
heterogeneous nuclear ribonucleoprotein at 27C, isoform H [Drosophila melanogaster]	0	0.0614525	0.0111111	0
DnaJ-like-2, isoform E [Drosophila melanogaster]	0	0.0167598	0.0222222	0.0493827
Cluster of eukaryotic initiation factor 4a, isoform F [Drosophila melanogaster] (NP_001260117.1)	0	0.0111732	0.0222222	0.037037
eukaryotic initiation factor 4a, isoform F [Drosophila melanogaster]	0	0.0111732	0.0222222	0.037037
eIF4AIII [Drosophila melanogaster]	0	0.00558659	0.0111111	0.0246914
Cluster of Glutamyl-prolyl-tRNA synthetase, isoform A [Drosophila melanogaster] (NP_524471.2)	0	0.0167598	0	0
Glutamyl-prolyl-tRNA synthetase, isoform A [Drosophila melanogaster]	0	0.0167598	0	0
Glutamyl-prolyl-tRNA synthetase, isoform B [Drosophila melanogaster]	0	0.0111732	0	0
Cluster of sterol carrier protein X-related thiolase [Drosophila melanogaster] (NP_524715.2)	0.011236	0.0111732	0.0111111	0
sterol carrier protein X-related thiolase [Drosophila melanogaster]	0.011236	0.0111732	0.0111111	0
uncharacterized protein Dmel_CG17597, isoform B [Drosophila melanogaster]	0	0	0	0
IGF-II mRNA-binding protein, isoform K [Drosophila melanogaster]	0.00561798	0.0223464	0.0111111	0
uncharacterized protein Dmel_CG17754, isoform G [Drosophila melanogaster]	0	0.00558659	0	0.0123457
malic enzyme, isoform B [Drosophila melanogaster]	0	0	0	0.0246914
uncharacterized protein Dmel_CG12262 [Drosophila melanogaster]	0	0.00558659	0.0111111	0.037037
lost [Drosophila melanogaster]	0	0.00558659	0.0111111	0
ribosomal protein L21, isoform C [Drosophila melanogaster]	0	0.0167598	0.0333333	0.0123457
Cluster of wing blister, isoform G [Drosophila melanogaster] (NP_476790.3-DECOY)	0	0	0	0
wing blister, isoform G [Drosophila melanogaster]	0	0	0	0
wing blister, isoform F [Drosophila melanogaster]	0	0	0	0
GTPase activating protein and centrosome-associated, isoform B [Drosophila melanogaster]	0.00561798	0.027933	0.0222222	0.0246914
alpha spectrin, isoform B [Drosophila melanogaster]	0	0	0	0
ribosomal protein L17, isoform E [Drosophila melanogaster]	0	0.00558659	0.0333333	0.0246914
ribosomal protein S5a, isoform D [Drosophila melanogaster]	0	0.0223464	0	0.0246914
Cluster of adenosylhomocysteinase like 1 [Drosophila melanogaster] (NP_647746.1)	0	0	0.0777778	0.0123457
adenosylhomocysteinase like 1 [Drosophila melanogaster]	0	0	0.0777778	0.0123457
adenosylhomocysteinase like 2, isoform D [Drosophila melanogaster]	0	0	0.0111111	0
TER94, isoform E [Drosophila melanogaster]	0	0	0	0
mitochondrial trifunctional protein alpha subunit, isoform A [Drosophila melanogaster]	0.00561798	0.0111732	0.0111111	0.0246914
glycoprotein 93 [Drosophila melanogaster]	0	0	0	0
Cluster of lipophorin receptor 1, isoform K [Drosophila melanogaster] (NP_001097934.2)	0	0	0	0
lipophorin receptor 1, isoform K [Drosophila melanogaster]	0	0	0	0
lipophorin receptor 1, isoform S [Drosophila melanogaster]	0	0	0	0
heat shock protein cognate 5, isoform B [Drosophila melanogaster]	0	0	0	0.0246914
non-claret disjunctional, isoform B [Drosophila melanogaster]	0	0.027933	0	0
regulatory particle triple-A ATPase 6 [Drosophila melanogaster]	0	0.0111732	0.0222222	0.0493827
ribosomal protein L9, isoform C [Drosophila melanogaster]	0.00561798	0.0167598	0.0222222	0.037037
Rab7, isoform C [Drosophila melanogaster]	0	0	0	0
chorion protein b at 7F, isoform A [Drosophila melanogaster]	0	0	0	0.0123457
Gamma-interferon-inducible lysosomal thiol reductase 1 [Drosophila melanogaster]	0.00561798	0.00558659	0.0222222	0.0493827
lethal (1) G0156, isoform C [Drosophila melanogaster]	0	0.0111732	0.0222222	0.037037
Lon protease, isoform C [Drosophila melanogaster]	0	0.027933	0	0
clathrin heavy chain, isoform G [Drosophila melanogaster]	0	0	0.0111111	0.0123457
deadhead, isoform B [Drosophila melanogaster]	0.00561798	0	0.0222222	0.0246914
spindle assembly abnormal 4 [Drosophila melanogaster]	0	0.027933	0	0
Cluster of G protein alpha q subunit, isoform D [Drosophila melanogaster] (NP_725196.1)	0	0	0	0
G protein alpha q subunit, isoform D [Drosophila melanogaster]	0	0	0	0
uncharacterized protein Dmel_CG30054, isoform E [Drosophila melanogaster]	0	0	0	0
uncharacterized protein Dmel_CG30054, isoform F [Drosophila melanogaster]	0	0	0	0
chorion protein a at 7F [Drosophila melanogaster]	0	0	0	0
uncharacterized protein Dmel_CG15293, isoform C [Drosophila melanogaster]	0	0.00558659	0	0
belle, isoform B [Drosophila melanogaster]	0	0	0.0111111	0.037037
beta spectrin, isoform A [Drosophila melanogaster]	0	0	0	0
ribosomal protein L35A [Drosophila melanogaster]	0	0.00558659	0.0222222	0
yellow-g2 [Drosophila melanogaster]	0	0	0	0.0123457
ribosomal protein L36, isoform E [Drosophila melanogaster]	0	0	0.0444444	0.037037
succinate dehydrogenase, subunit A (flavoprotein), isoform C [Drosophila melanogaster]	0	0	0	0.0246914
Cluster of Rab6, isoform B [Drosophila melanogaster] (NP_001285869.1)	0	0	0.0111111	0
Rab6, isoform B [Drosophila melanogaster]	0	0	0.0111111	0
Rab39, isoform B [Drosophila melanogaster]	0	0	0	0
chorion protein 18 [Drosophila melanogaster]	0	0.0111732	0	0.0123457
uncharacterized protein Dmel_CG30069 [Drosophila melanogaster]	0	0	0	0
Rab5, isoform I [Drosophila melanogaster]	0.00561798	0	0	0
IGH1M_MOUSE RecName: Full=Ig gamma-1 chain C region, membrane-bound form	0	0.00558659	0	0
La related protein, isoform H [Drosophila melanogaster]	0	0.0223464	0	0.0123457
chorion protein 19 [Drosophila melanogaster]	0	0	0	0
swallow [Drosophila melanogaster]	0.0168539	0	0	0
wispy, isoform B [Drosophila melanogaster]	0.00561798	0.0111732	0.0111111	0
Sarco/endoplasmic reticulum Ca(2+)-ATPase, isoform A [Drosophila melanogaster]	0	0	0	0.0123457
ribosomal protein L31, isoform C [Drosophila melanogaster]	0.00561798	0.0111732	0.0111111	0.037037
argonaute 2, isoform B [Drosophila melanogaster]	0.011236	0.00558659	0	0.0246914
secreted Wg-interacting molecule, isoform B [Drosophila melanogaster]	0	0	0	0
Isoleucyl-tRNA synthetase, isoform D [Drosophila melanogaster]	0.00561798	0.0223464	0	0
Rap1 GTPase, isoform C [Drosophila melanogaster]	0	0	0	0
CG8507 [Drosophila melanogaster]	0	0.0111732	0	0
Rab2, isoform B [Drosophila melanogaster]	0	0	0	0
cyclophilin 1 [Drosophila melanogaster]	0	0	0	0.037037
prophenoloxidase 2 [Drosophila melanogaster]	0	0.00558659	0	0.037037
transforming acidic coiled-coil protein, isoform N [Drosophila melanogaster]	0.011236	0	0	0
sister of feo, isoform B [Drosophila melanogaster]	0	0	0	0
vitelline membrane 26Aa, isoform B [Drosophila melanogaster]	0	0.00558659	0	0.0123457
Cluster of wings up A, isoform A [Drosophila melanogaster] (NP_728141.1)	0	0	0	0
wings up A, isoform A [Drosophila melanogaster]	0	0	0	0
wings up A, isoform F [Drosophila melanogaster]	0	0	0	0
transferrin 1, isoform C [Drosophila melanogaster]	0	0	0	0.0617284
chorion protein 15 [Drosophila melanogaster]	0	0	0	0
cctgamma, isoform D [Drosophila melanogaster]	0	0	0	0.0246914
ribosomal protein S24 [Drosophila melanogaster]	0	0.0167598	0	0
gamma-Tubulin at 37C, isoform B [Drosophila melanogaster]	0	0.0111732	0	0.0246914
female-specific independent of transformer [Drosophila melanogaster]	0	0.00558659	0.0111111	0.0123457
CG4447 [Drosophila melanogaster]	0	0	0	0.0246914
T-cp1zeta [Drosophila melanogaster]	0	0.00558659	0	0.0246914
CG8036, isoform D [Drosophila melanogaster]	0	0	0	0.037037
twinstar [Drosophila melanogaster]	0	0	0	0.037037
peroxin 14 [Drosophila melanogaster]	0	0.0111732	0	0
regulatory particle triple-A ATPase 1 [Drosophila melanogaster]	0	0	0.0111111	0.0246914
uncharacterized protein Dmel_CG33923 [Drosophila melanogaster]	0	0	0	0
Cluster of vacuolar H[+] ATPase 68 kDa subunit 2, isoform F [Drosophila melanogaster] (NP_001260425.1)	0	0	0	0
vacuolar H[+] ATPase 68 kDa subunit 2, isoform F [Drosophila melanogaster]	0	0	0	0
vacuolar H[+] ATPase 68kD subunit 3 [Drosophila melanogaster]	0	0	0	0
Cluster of troponin C at 73F, isoform C [Drosophila melanogaster] (NP_001287091.1)	0.00561798	0	0	0
troponin C at 73F, isoform C [Drosophila melanogaster]	0.00561798	0	0	0
troponin C at 47D, isoform B [Drosophila melanogaster]	0	0	0	0
chorion protein 38, isoform B [Drosophila melanogaster]	0	0	0	0
roadkill, isoform C [Drosophila melanogaster]	0.00561798	0.0111732	0	0
ADP ribosylation factor at 102F, isoform B [Drosophila melanogaster]	0.00561798	0	0	0
Rho1, isoform F [Drosophila melanogaster]	0	0	0	0
Grip71 [Drosophila melanogaster]	0	0.0111732	0	0
elongation factor 1 beta, isoform C [Drosophila melanogaster]	0	0	0	0.0123457
Aspartyl-tRNA synthetase, isoform B [Drosophila melanogaster]	0	0.0111732	0.0111111	0
IGHG_RABIT RecName: Full=Ig gamma chain C region	0	0	0	0
Rho guanine nucleotide exchange factor at 64C, isoform B [Drosophila melanogaster]	0	0	0	0
uncharacterized protein Dmel_CG13084 [Drosophila melanogaster]	0	0	0	0
bonus, isoform B [Drosophila melanogaster]	0	0.00558659	0	0
uncharacterized protein Dmel_CG15735 [Drosophila melanogaster]	0.00561798	0.00558659	0.0111111	0
uncharacterized protein Dmel_CG13364 [Drosophila melanogaster]	0	0	0	0.0246914
Cluster of Rac1, isoform B [Drosophila melanogaster] (NP_001261247.1)	0	0	0	0
Rac1, isoform B [Drosophila melanogaster]	0	0	0	0
Rac2, isoform B [Drosophila melanogaster]	0	0	0	0
Lysyl-tRNA synthetase, isoform C [Drosophila melanogaster]	0	0.0111732	0	0
uncharacterized protein Dmel_CG11876, isoform A [Drosophila melanogaster]	0	0	0	0.0246914
CG7637 [Drosophila melanogaster]	0	0	0	0
atilla, isoform C [Drosophila melanogaster]	0	0	0	0.0246914
THIO_ECOLI RecName: Full=Thioredoxin-1; Short=Trx-1	0	0	0	0.0246914
Pi4KIIalpha, isoform B [Drosophila melanogaster]	0	0	0	0
CG8258 [Drosophila melanogaster]	0	0	0	0.0123457
CG5525 [Drosophila melanogaster]	0	0	0	0.0246914
uncharacterized protein Dmel_CG11381 [Drosophila melanogaster]	0	0	0	0

## Sheet: Normalized WT v H2Av
Figure 1-Source Data 3
Values for total spectrum counts normalized to levels of GFP spectrum counts in each replicate sample.
	Total spectrum count normalized to GFP protein in each sample.
Protein	Gnu-wt-GFP		H2Av-GFP
GFP_AEQVI RecName: Full=Green fluorescent protein	1	1	1	1	1
giant nuclei [Drosophila melanogaster]	0.561129	0.473404	0	0	0.00837989
bicaudal C, isoform B [Drosophila melanogaster]	0.288401	0.034574	0	0	0
twenty-four, isoform M [Drosophila melanogaster]	0.200627	0.015957	0.061224	0	0.0307263
poly(A) binding protein, isoform C [Drosophila melanogaster]	0.159875	0.034574	0	0	0.0670391
Cluster of heat shock protein cognate 4, isoform G [Drosophila melanogaster] (NP_001262586.1)	0.144201	0.071809	0.612245	0.387097	0.175978
Cluster of ypsilon schachtel, isoform B [Drosophila melanogaster] (NP_001246730.1)	0.125392	0.029255	0	0	0.0782123
twins, isoform I [Drosophila melanogaster]	0.122257	0.023936	0	0	0
twenty-four, isoform N [Drosophila melanogaster]	0.119122	0.029255	0	0	0
Cluster of beta-Tubulin at 56D, isoform B [Drosophila melanogaster] (NP_523795.2)	0.103448	0.021277	0.408163	0.483871	0.0446927
heat shock 70-kDa protein cognate 3, isoform E [Drosophila melanogaster]	0.090909	0.066489	0.530612	0.258065	0.122905
protein phosphatase 2A at 29B, isoform A [Drosophila melanogaster]	0.084639	0	0	0	0.0139665
Ataxin-2, isoform B [Drosophila melanogaster]	0.062696	0.015957	0	0	0.0167598
fibrillarin [Drosophila melanogaster]	0.059561	0	0	0	0.0167598
rasputin, isoform G [Drosophila melanogaster]	0.047022	0	0.061224	0	0.0251397
belphegor, isoform B [Drosophila melanogaster]	0.043887	0.005319	0	0	0
ribosomal protein L4 [Drosophila melanogaster]	0.040752	0	0.408163	0.290323	0.195531
ribosomal protein L23A [Drosophila melanogaster]	0.034483	0.031915	0	0	0
heterogeneous nuclear ribonucleoprotein at 27C, isoform H [Drosophila melanogaster]	0.034483	0	0	0	0
microtubule star, isoform C [Drosophila melanogaster]	0.031348	0	0	0	0
ribosomal protein L18, isoform C [Drosophila melanogaster]	0.028213	0.007979	0.040816	0.129032	0.125698
heat shock protein 27, isoform B [Drosophila melanogaster]	0.028213	0.007979	0	0	0.00837989
CG4586 [Drosophila melanogaster]	0.028213	0.005319	0	0	0
ribosomal protein S6, isoform B [Drosophila melanogaster]	0.025078	0.010638	0.122449	0	0.0977654
eukaryotic translation initiation factor 4G, isoform B [Drosophila melanogaster]	0.025078	0.007979	0.061224	0	0.0307263
heat shock protein 26, isoform B [Drosophila melanogaster]	0.025078	0	0	0	0
ribosomal protein L8, isoform B [Drosophila melanogaster]	0.025078	0	0.122449	0.225806	0.075419
ribosomal protein L36A, isoform B [Drosophila melanogaster]	0.021944	0.013298	0	0	0
ribosomal protein L10Ab, isoform A [Drosophila melanogaster]	0.021944	0.007979	0.183673	0.258065	0.120112
ribosomal protein L23 [Drosophila melanogaster]	0.021944	0	0.040816	0	0.0195531
eukaryotic initiation factor 4E, isoform I [Drosophila melanogaster]	0.021944	0	0	0	0.0167598
ribosomal protein L14 [Drosophila melanogaster]	0.018809	0.007979	0.142857	0.258065	0.117318
Tcp1-like, isoform B [Drosophila melanogaster]	0.018809	0.007979	0	0	0.0139665
ribosomal protein S17 [Drosophila melanogaster]	0.018809	0.005319	0	0	0
ribosomal protein S26, isoform E [Drosophila melanogaster]	0.018809	0	0	0	0
ribosomal protein L23A [Drosophila melanogaster]	0.018809	0	0.102041	0.0645161	0.125698
Cluster of elongation factor 1alpha48D, isoform E [Drosophila melanogaster] (NP_001286322.1)	0.018809	0	0	0	0.0167598
Cluster of Fmr1, isoform G [Drosophila melanogaster] (NP_001247017.1)	0.018809	0	0	0	0.00558659
CG5726 [Drosophila melanogaster]	0.018809	0	0	0	0.00837989
ribosomal protein L28, isoform G [Drosophila melanogaster]	0.015674	0.007979	0.102041	0	0.0530726
spindle assembly abnormal 4 [Drosophila melanogaster]	0.015674	0	0	0	0
histone H4 [Drosophila melanogaster]	0.015674	0	0.22449	0.419355	0.0502793
Lon protease, isoform C [Drosophila melanogaster]	0.015674	0	0	0	0
GTPase activating protein and centrosome-associated, isoform B [Drosophila melanogaster]	0.015674	0	0	0	0
lingerer, isoform D [Drosophila melanogaster]	0.015674	0	0	0	0.0139665
ribosomal protein L11, isoform B [Drosophila melanogaster]	0.015674	0	0	0	0.0195531
Cluster of jabba, isoform C [Drosophila melanogaster] (NP_001137703.1)	0.015674	0	3.61225	3.19355	2.60615
ribosomal protein L30, isoform E [Drosophila melanogaster]	0.012539	0	0	0	0.0670391
Isoleucyl-tRNA synthetase, isoform D [Drosophila melanogaster]	0.012539	0	0	0	0.00837989
ribosomal protein L27, isoform D [Drosophila melanogaster]	0.012539	0	0.183673	0	0
La related protein, isoform H [Drosophila melanogaster]	0.012539	0	0	0	0
IGF-II mRNA-binding protein, isoform K [Drosophila melanogaster]	0.012539	0	0	0	0.0139665
uncharacterized protein Dmel_CG17018, isoform E [Drosophila melanogaster]	0.009404	0.007979	0	0	0
abnormal spindle [Drosophila melanogaster]	0.009404	0.005319	0	0	0
ribosomal protein S24 [Drosophila melanogaster]	0.009404	0	0	0	0
ribosomal protein L21, isoform C [Drosophila melanogaster]	0.009404	0	0	0	0.0530726
ribosomal protein L9, isoform C [Drosophila melanogaster]	0.009404	0	0.040816	0.0645161	0.0558659
ribosomal protein L7, isoform B [Drosophila melanogaster]	0.009404	0	0.22449	0.16129	0.108939
bellwether [Drosophila melanogaster]	0.009404	0	0.163265	0.0967742	0.150838
glycogen synthase, isoform D [Drosophila melanogaster]	0.009404	0	0.081633	0	0.0391061
ribosomal protein S9, isoform E [Drosophila melanogaster]	0.00627	0	0.061224	0	0.0363129
wispy, isoform B [Drosophila melanogaster]	0.00627	0	0	0	0.00558659
Cluster of ribosomal protein L34b, isoform D [Drosophila melanogaster] (NP_001287250.1)	0.00627	0	0.040816	0	0.0446927
ribosomal protein L15, isoform I [Drosophila melanogaster]	0.00627	0	0.081633	0.0645161	0.0558659
peroxin 14 [Drosophila melanogaster]	0.00627	0	0	0	0
CG8507 [Drosophila melanogaster]	0.00627	0	0	0	0.0111732
Cluster of eukaryotic initiation factor 4a, isoform F [Drosophila melanogaster] (NP_001260117.1)	0.00627	0	0	0	0
Cluster of regulatory particle triple-A ATPase 5 [Drosophila melanogaster] (NP_524464.1)	0.00627	0	0	0	0
gamma-Tubulin at 37C, isoform B [Drosophila melanogaster]	0.00627	0	0	0	0.0195531
Aspartyl-tRNA synthetase, isoform B [Drosophila melanogaster]	0.00627	0	0	0	0.00837989
ribosomal protein S14b, isoform B [Drosophila melanogaster]	0	0.023936	0.183673	0.129032	0.0977654
Cluster of stress-sensitive B, isoform E [Drosophila melanogaster] (NP_001285090.1)	0	0.021277	0	0	0.0614525
ribosomal protein S16, isoform B [Drosophila melanogaster]	0	0.015957	0	0	0.0670391
protein phosphatase 2A at 29B, isoform D [Drosophila melanogaster]	0	0.010638	0	0	0
argonaute 2, isoform B [Drosophila melanogaster]	0	0.005319	0	0	0
transforming acidic coiled-coil protein, isoform N [Drosophila melanogaster]	0	0.005319	0	0	0
zipper, isoform D [Drosophila melanogaster]	0	0.005319	0	0	0
glycogen synthase, isoform A [Drosophila melanogaster]	0	0.005319	0	0	0
Na pump alpha subunit, isoform I [Drosophila melanogaster]	0	0	0	0	0
lipophorin receptor 1, isoform K [Drosophila melanogaster]	0	0	0	0	0
ribosomal protein L36A, isoform B [Drosophila melanogaster]	0	0	0	0	0.0614525
Cluster of troponin C at 73F, isoform C [Drosophila melanogaster] (NP_001287091.1)	0	0	0	0	0
ribosomal protein L24, isoform C [Drosophila melanogaster]	0	0	0	0	0.027933
ADP ribosylation factor at 102F, isoform B [Drosophila melanogaster]	0	0	0	0	0
Rac2, isoform B [Drosophila melanogaster]	0	0	0	0	0
Rap1 GTPase, isoform C [Drosophila melanogaster]	0	0	0	0	0
Rho guanine nucleotide exchange factor at 64C, isoform B [Drosophila melanogaster]	0	0	0	0	0
Rho1, isoform F [Drosophila melanogaster]	0	0	0	0	0
Cluster of Rab6, isoform B [Drosophila melanogaster] (NP_001285869.1)	0	0	0	0	0
Rab7, isoform C [Drosophila melanogaster]	0	0	0	0	0
Gamma-interferon-inducible lysosomal thiol reductase 1 [Drosophila melanogaster]	0	0	0	0	0.0502793
uncharacterized protein Dmel_CG30069 [Drosophila melanogaster]	0	0	0	0	0
uncharacterized protein Dmel_CG13084 [Drosophila melanogaster]	0	0	0	0	0
malic enzyme, isoform B [Drosophila melanogaster]	0	0	0	0	0
TER94, isoform C [Drosophila melanogaster]	0	0	0	0	0
transportin, isoform D [Drosophila melanogaster]	0	0	0	0	0.0111732
eIF3-S8, isoform B [Drosophila melanogaster]	0	0	0	0	0.00837989
Sarco/endoplasmic reticulum Ca(2+)-ATPase, isoform I [Drosophila melanogaster]	0	0	0.183673	0.0645161	0.134078
CAS/CSE1 segregation protein [Drosophila melanogaster]	0	0	0	0	0.00558659
Methionyl-tRNA synthetase [Drosophila melanogaster]	0	0	0	0	0.00558659
Ranbp9, isoform D [Drosophila melanogaster]	0	0	0.061224	0	0.0502793
ribosomal protein LP2 [Drosophila melanogaster]	0	0	0	0	0.0446927
bonus, isoform B [Drosophila melanogaster]	0	0	0	0	0
karyopherin beta 3, isoform B [Drosophila melanogaster]	0	0	0	0	0.100559
RING-associated factor 2, isoform C [Drosophila melanogaster]	0	0	0	0	0
GRIP and coiled-coil domain containing 185 kDa [Drosophila melanogaster]	0	0	0	0	0.00837989
CG7728 [Drosophila melanogaster]	0	0	0.040816	0	0
eIF3-S10, isoform D [Drosophila melanogaster]	0	0	0	0	0.00837989
female-specific independent of transformer [Drosophila melanogaster]	0	0	0	0	0
histone H2B [Drosophila melanogaster]	0	0	0	0	0.27095
histone H2B [Drosophila melanogaster]	0	0	0	0	0
hoi-polloi, isoform B [Drosophila melanogaster]	0	0	0	0	0.0167598
ribosomal protein L36, isoform E [Drosophila melanogaster]	0	0	0.061224	0	0.075419
golden goal [Drosophila melanogaster]	0	0	0	0	0.0251397
atilla, isoform C [Drosophila melanogaster]	0	0	0	0	0.0111732
Cluster of histone H2A variant, isoform B [Drosophila melanogaster] (NP_001262997.1)	0	0	0.693878	0.677419	0.296089
ribosomal protein L31, isoform C [Drosophila melanogaster]	0	0	0	0	0
Cluster of host cell factor, isoform G [Drosophila melanogaster] (NP_995595.1)	0	0	0.040816	0	0
host cell factor, isoform G [Drosophila melanogaster]	0	0	0	0	0.0782123
ATP synthase, delta subunit, isoform C [Drosophila melanogaster]	0	0	0	0	0.0167598
calmodulin, isoform E [Drosophila melanogaster]	0	0	0.040816	0	0.00558659
ribosomal protein L26, isoform C [Drosophila melanogaster]	0	0	0.122449	0	0.0782123
ribosomal protein L32, isoform C [Drosophila melanogaster]	0	0	0	0	0.0530726
uncharacterized protein Dmel_CG31368, isoform C [Drosophila melanogaster]	0	0	0	0	0.00558659
CG8370, isoform B [Drosophila melanogaster]	0	0	0	0	0
CCHC-type zinc finger nucleic acid binding protein, isoform B [Drosophila melanogaster]	0	0	0	0	0
ribosomal protein L35A [Drosophila melanogaster]	0	0	0	0	0.164804
listerin E3 ubiquitin protein ligase 1 [Drosophila melanogaster]	0	0	0	0	0.0111732
ATP synthase, subunit D, isoform C [Drosophila melanogaster]	0	0	0	0	0.0139665
twenty-four, isoform N [Drosophila melanogaster]	0	0	0	0	0
ribosomal protein L18A [Drosophila melanogaster]	0	0	0.163265	0	0.128492
enhancer of polycomb, isoform C [Drosophila melanogaster]	0	0	0.346939	0.16129	0.111732
MRG/MORF4L binding protein [Drosophila melanogaster]	0	0	0	0	0.0251397
ribosomal protein L17, isoform E [Drosophila melanogaster]	0	0	0.061224	0	0.0307263
protein partner of snf, isoform B [Drosophila melanogaster]	0	0	0.183673	0.0967742	0.122905
Esa1-associated factor 6 [Drosophila melanogaster]	0	0	0	0	0.0223464
ribosomal protein L13A, isoform B [Drosophila melanogaster]	0	0	0.061224	0	0.0782123
uncharacterized protein Dmel_CG15735 [Drosophila melanogaster]	0	0	0	0	0.00837989
DNA polymerase epsilon 255kD subunit [Drosophila melanogaster]	0	0	0	0	0.0223464
Gas41 [Drosophila melanogaster]	0	0	0.061224	0	0.0167598
megator, isoform B [Drosophila melanogaster]	0	0	0	0	0
alpha spectrin, isoform B [Drosophila melanogaster]	0	0	0	0	0
ribosomal protein L23A [Drosophila melanogaster]	0	0	0	0	0
ribosomal protein L23A [Drosophila melanogaster]	0	0	0	0	0
uncharacterized protein Dmel_CG10880, isoform B [Drosophila melanogaster]	0	0	0	0	0.00837989
ATP synthase, gamma subunit, isoform C [Drosophila melanogaster]	0	0	0.102041	0	0.0614525
ribosomal protein LP0, isoform B [Drosophila melanogaster]	0	0	0	0	0.0530726
Cluster of domino, isoform G [Drosophila melanogaster] (NP_001286676.1)	0	0	0.938776	0.709677	0.326816
CG6937 [Drosophila melanogaster]	0	0	0.061224	0	0.0558659
YL-1, isoform B [Drosophila melanogaster]	0	0	0	0	0.0251397
lethal (1) G0156, isoform D [Drosophila melanogaster]	0	0	0	0	0.0195531
mapmodulin, isoform D [Drosophila melanogaster]	0	0	0.44898	0.548387	0.206704
Cluster of actin 42A [Drosophila melanogaster] (NP_523625.1)	0	0	0	0	0.122905
nucleosome assembly protein 1, isoform C [Drosophila melanogaster]	0	0	0.081633	0	0.0698324
Nipped-A, isoform E [Drosophila melanogaster]	0	0	0.326531	0.225806	0.209497
Actin-related protein 6 [Drosophila melanogaster]	0	0	0	0	0.0223464
Cluster of regulatory particle triple-A ATPase 6 [Drosophila melanogaster] (NP_608447.1)	0	0	0	0	0
uncharacterized protein Dmel_CG12262 [Drosophila melanogaster]	0	0	0	0	0
brahma associated protein 55kD [Drosophila melanogaster]	0	0	0.22449	0.129032	0.114525
ribosomal protein L3, isoform H [Drosophila melanogaster]	0	0	0.183673	0.16129	0.120112
MORF-related gene 15, isoform B [Drosophila melanogaster]	0	0	0.061224	0.0645161	0.0307263
DNA methyltransferase 1 associated protein 1 [Drosophila melanogaster]	0	0	0.244898	0.129032	0.114525
eukaryotic translation elongation factor 1 alpha 1, isoform E [Drosophila melanogaster]	0	0	0	0	0
pontin [Drosophila melanogaster]	0	0	0.163265	0.16129	0.122905
elongation factor 1alpha100E, isoform C [Drosophila melanogaster]	0	0	0.102041	0.290323	0
Int6 [Drosophila melanogaster]	0	0	0	0	0.00558659
thiolase [Drosophila melanogaster]	0	0	0	0	0.00558659
Sec61 alpha subunit, isoform B [Drosophila melanogaster]	0	0	0	0	0.00837989
LDL receptor protein 1, isoform F [Drosophila melanogaster]	0	0	0	0.0645161	0
reptin, isoform C [Drosophila melanogaster]	0	0	0.326531	0.258065	0.223464
ATP synthase, beta subunit, isoform C [Drosophila melanogaster]	0	0	0	0.0645161	0.0726257
histone deacetylase 1 [Drosophila melanogaster]	0	0	0.326531	0.322581	0.0670391
pendulin [Drosophila melanogaster]	0	0	0	0	0.00558659
T-cp1zeta [Drosophila melanogaster]	0	0	0	0	0
cctgamma, isoform D [Drosophila melanogaster]	0	0	0	0	0
CG8258 [Drosophila melanogaster]	0	0	0	0	0
purity of essence, isoform B [Drosophila melanogaster]	0	0	0	0	0
Cluster of heat shock protein 60A, isoform B [Drosophila melanogaster] (NP_727489.1)	0	0	0	0	0
CG1620, isoform C [Drosophila melanogaster]	0	0	0.204082	0.0967742	0
Cluster of CG1620, isoform C [Drosophila melanogaster] (NP_001260777.1)	0	0	0	0	0.0921788
stunted, isoform A [Drosophila melanogaster]	0	0	0	0	0.0111732
uncharacterized protein Dmel_CG13364 [Drosophila melanogaster]	0	0	0	0	0.0251397
transferrin 1, isoform C [Drosophila melanogaster]	0	0	0	0	0
heat shock protein cognate 5, isoform B [Drosophila melanogaster]	0	0	0	0	0
apoptosis inducing factor, isoform C [Drosophila melanogaster]	0	0	0	0	0.0139665
mitochondrial trifunctional protein alpha subunit, isoform A [Drosophila melanogaster]	0	0	0.040816	0	0.00837989
belle, isoform B [Drosophila melanogaster]	0	0	0	0	0
ATP synthase, subunit E, isoform C [Drosophila melanogaster]	0	0	0	0	0.0111732
bromodomain containing 8 [Drosophila melanogaster]	0	0	0.081633	0.0645161	0.0810056
elongation factor 2, isoform C [Drosophila melanogaster]	0	0	0.22449	0.0967742	0
aluminum tubes, isoform H [Drosophila melanogaster]	0	0	0.061224	0	0.0335196
uncharacterized protein Dmel_CG30497, isoform A [Drosophila melanogaster]	0	0	0	0	0.00558659

## Sheet: WT v deltaSAM Statistics
Figure 1-Source Data 3
Results for multiple t-test statistical analysis of normalized total spectrum counts for GNU-WT-GFP vs. GNU-deltaSAM-GFP.
Protein	Discovery?	P value	Mean of gnu-wt-gfp	Mean of gnu-deltaSAM-gfp	Difference	SE of difference	t ratio	df	q value
Cluster of giant nuclei [Drosophila melanogaster] (NP_648726.1)	No	>0.999999	1	1	0	0.03707	0	468	>0.999999
Cluster of ribosomal protein S27A [Drosophila melanogaster] (NP_476778.1)	No	0.148612	0.1682	0.2218	-0.05363	0.03707	1.447	468	>0.999999
ribosomal protein S27A [Drosophila melanogaster]	No	0.279443	0.1542	0.1943	-0.04014	0.03707	1.083	468	>0.999999
ribosomal protein L40, isoform B [Drosophila melanogaster]	No	0.413163	0.1094	0.1398	-0.03036	0.03707	0.8191	468	>0.999999
Ubiquitin-63E, isoform D [Drosophila melanogaster]	No	>0.999999	0	0	0	0.03707	0	468	>0.999999
ribosomal protein S3, isoform B [Drosophila melanogaster]	No	0.344942	0.1902	0.1551	0.03505	0.03707	0.9454	468	>0.999999
ribosomal protein S25, isoform B [Drosophila melanogaster]	No	0.135267	0.06996	0.1254	-0.05546	0.03707	1.496	468	>0.999999
Cluster of twins, isoform I [Drosophila melanogaster] (NP_001287269.1)	Yes	<0.000001	0.1342	0.3669	-0.2326	0.03707	6.276	468	<0.000001
uncharacterized protein Dmel_CG33308 [Drosophila melanogaster]	No	0.810062	0.01679	0.007877	0.008915	0.03707	0.2405	468	>0.999999
ribosomal protein L38, isoform B [Drosophila melanogaster]	No	0.525593	0.05591	0.07946	-0.02355	0.03707	0.6352	468	>0.999999
uncharacterized protein Dmel_CG34447, isoform B [Drosophila melanogaster]	No	>0.999999	0	0	0	0.03707	0	468	>0.999999
CG5665, isoform C [Drosophila melanogaster]	No	>0.999999	0	0	0	0.03707	0	468	>0.999999
CG5162, isoform B [Drosophila melanogaster]	No	>0.999999	0	0	0	0.03707	0	468	>0.999999
ribosomal protein L22 [Drosophila melanogaster]	No	0.731094	0.07269	0.08544	-0.01275	0.03707	0.3439	468	>0.999999
ribosomal protein L29, isoform D [Drosophila melanogaster]	No	0.108193	0.04204	0.1017	-0.05966	0.03707	1.609	468	>0.999999
twenty-four, isoform N [Drosophila melanogaster]	No	0.506178	0.1956	0.171	0.02466	0.03707	0.6653	468	>0.999999
Cluster of bicaudal C, isoform B [Drosophila melanogaster] (NP_723948.1)	Yes	<0.000001	0.2935	0.003289	0.2902	0.03707	7.829	468	<0.000001
eukaryotic translation initiation factor 4G, isoform B [Drosophila melanogaster]	No	0.746505	0.03077	0.04276	-0.01199	0.03707	0.3234	468	>0.999999
Cluster of ypsilon schachtel, isoform B [Drosophila melanogaster] (NP_001246730.1)	No	0.81965	0.1426	0.1342	0.008456	0.03707	0.2281	468	>0.999999
Cluster of protein phosphatase 2A at 29B, isoform A [Drosophila melanogaster] (NP_001027227.1)	No	0.001779	0.08665	0.2032	-0.1165	0.03707	3.143	468	0.104197
ribosomal protein L24, isoform C [Drosophila melanogaster]	No	0.805113	0.01119	0.02034	-0.009152	0.03707	0.2469	468	>0.999999
ribosomal protein L7A, isoform F [Drosophila melanogaster]	No	0.319907	0.04195	0.07886	-0.03691	0.03707	0.9957	468	>0.999999
CG3800, isoform B [Drosophila melanogaster]	No	0.40605	0.04474	0.07557	-0.03083	0.03707	0.8316	468	>0.999999
Cluster of alpha-Tubulin at 84B [Drosophila melanogaster] (NP_476772.1)	No	0.814394	0.06713	0.05843	0.008707	0.03707	0.2349	468	>0.999999
alpha-Tubulin at 85E [Drosophila melanogaster]	No	0.884831	0.04476	0.03938	0.005372	0.03707	0.1449	468	>0.999999
ribosomal protein S8, isoform G [Drosophila melanogaster]	No	0.43004	0.05875	0.08803	-0.02928	0.03707	0.7898	468	>0.999999
fibrillarin [Drosophila melanogaster]	No	0.287971	0.05588	0.01645	0.03943	0.03707	1.064	468	>0.999999
ribosomal protein S14b, isoform B [Drosophila melanogaster]	No	0.388406	0.08394	0.05194	0.032	0.03707	0.8633	468	>0.999999
ribosomal protein S27, isoform B [Drosophila melanogaster]	No	0.760572	0.06713	0.05583	0.0113	0.03707	0.3049	468	>0.999999
Cluster of heat shock protein 68 [Drosophila melanogaster] (NP_524474.1)	No	0.272319	0.04201	0.08275	-0.04074	0.03707	1.099	468	>0.999999
ribosomal protein S3A, isoform F [Drosophila melanogaster]	No	0.997365	0.04479	0.04466	0.0001225	0.03707	0.003304	468	>0.999999
ribosomal protein S7, isoform E [Drosophila melanogaster]	No	0.744459	0.04758	0.03549	0.01209	0.03707	0.3261	468	>0.999999
ribosomal protein S19a, isoform E [Drosophila melanogaster]	No	0.843383	0.03076	0.03809	-0.007328	0.03707	0.1977	468	>0.999999
heat shock protein 27, isoform B [Drosophila melanogaster]	No	0.251015	0.03357	0.07617	-0.0426	0.03707	1.149	468	>0.999999
ribosomal protein S18, isoform B [Drosophila melanogaster]	No	0.711546	0.02238	0.03609	-0.01372	0.03707	0.37	468	>0.999999
ribosomal protein S23, isoform B [Drosophila melanogaster]	No	0.682825	0.05045	0.06561	-0.01516	0.03707	0.4089	468	>0.999999
ribosomal protein L8, isoform B [Drosophila melanogaster]	No	0.323322	0.02516	0.06181	-0.03665	0.03707	0.9887	468	>0.999999
microtubule star, isoform C [Drosophila melanogaster]	No	0.00048	0.03074	0.1611	-0.1304	0.03707	3.516	468	0.037494
alpha-Tubulin at 67C [Drosophila melanogaster]	No	0.964864	0.03914	0.04077	-0.001634	0.03707	0.04407	468	>0.999999
ribosomal protein L4 [Drosophila melanogaster]	No	0.782896	0.03912	0.04934	-0.01022	0.03707	0.2757	468	>0.999999
Ataxin-2, isoform B [Drosophila melanogaster]	No	0.411651	0.07272	0.1032	-0.03046	0.03707	0.8217	468	>0.999999
Cluster of ribosomal protein S11, isoform C [Drosophila melanogaster] (NP_725114.1)	No	0.877485	0.03922	0.0335	0.005718	0.03707	0.1542	468	>0.999999
ribosomal protein S11, isoform C [Drosophila melanogaster]	No	0.877485	0.03922	0.0335	0.005718	0.03707	0.1542	468	>0.999999
ribosomal protein S11, isoform B [Drosophila melanogaster]	No	0.867282	0.03641	0.03021	0.006198	0.03707	0.1672	468	>0.999999
ribosomal protein L10, isoform E [Drosophila melanogaster]	No	0.980124	0.03915	0.04008	-0.000924	0.03707	0.02493	468	>0.999999
Cluster of glyceraldehyde 3 phosphate dehydrogenase 2, isoform C [Drosophila melanogaster] (NP_001259584.1)	No	0.859361	0.01117	0.01775	-0.006572	0.03707	0.1773	468	>0.999999
glyceraldehyde 3 phosphate dehydrogenase 2, isoform C [Drosophila melanogaster]	No	0.859361	0.01117	0.01775	-0.006572	0.03707	0.1773	468	>0.999999
glyceraldehyde 3 phosphate dehydrogenase 1, isoform B [Drosophila melanogaster]	No	0.880423	0.005587	0.01117	-0.00558	0.03707	0.1505	468	>0.999999
heat shock protein cognate 2 [Drosophila melanogaster]	No	0.832172	0.01966	0.02752	-0.00786	0.03707	0.212	468	>0.999999
ribosomal protein L27A, isoform D [Drosophila melanogaster]	No	0.966518	0.02519	0.02363	0.001557	0.03707	0.042	468	>0.999999
pyruvate kinase, isoform A [Drosophila melanogaster]	No	0.975551	0.03074	0.02961	0.001137	0.03707	0.03066	468	>0.999999
ribosomal protein S16, isoform B [Drosophila melanogaster]	No	0.496146	0.04758	0.02233	0.02525	0.03707	0.6811	468	>0.999999
ribosomal protein L23A [Drosophila melanogaster]	No	0.604537	0.01957	0.03878	-0.01921	0.03707	0.5182	468	>0.999999
heat shock protein 83, isoform B [Drosophila melanogaster]	No	0.707432	0.008411	0.02233	-0.01392	0.03707	0.3755	468	>0.999999
ribosomal protein S6, isoform B [Drosophila melanogaster]	No	0.970283	0.03358	0.0322	0.001382	0.03707	0.03727	468	>0.999999
ribosomal protein L28, isoform G [Drosophila melanogaster]	No	0.764639	0.02239	0.0335	-0.0111	0.03707	0.2996	468	>0.999999
ribosomal protein L10Ab, isoform A [Drosophila melanogaster]	No	0.937186	0.02798	0.0309	-0.002923	0.03707	0.07885	468	>0.999999
heat shock protein 26, isoform B [Drosophila melanogaster]	No	0.401076	0.02796	0.05912	-0.03116	0.03707	0.8405	468	>0.999999
CG2233 [Drosophila melanogaster]	No	0.939966	0.002793	0	0.002793	0.03707	0.07535	468	>0.999999
glycogen synthase, isoform A [Drosophila melanogaster]	No	0.727565	0.014	0.02692	-0.01292	0.03707	0.3486	468	>0.999999
ribosomal protein S20 [Drosophila melanogaster]	No	0.504253	0.02517	0.04995	-0.02477	0.03707	0.6683	468	>0.999999
14-3-3zeta, isoform F [Drosophila melanogaster]	No	0.983249	0.008396	0.009174	-0.0007787	0.03707	0.02101	468	>0.999999
ribosomal protein L18, isoform C [Drosophila melanogaster]	No	0.873461	0.03357	0.03947	-0.005907	0.03707	0.1594	468	>0.999999
ribosomal protein L7, isoform B [Drosophila melanogaster]	No	0.667311	0.00838	0.02432	-0.01594	0.03707	0.4301	468	>0.999999
bellwether [Drosophila melanogaster]	No	0.92884	0.01119	0.007877	0.003312	0.03707	0.08935	468	>0.999999
Cluster of histone H4 [Drosophila melanogaster] (NP_001027382.1)	No	0.652111	0.01678	0.0335	-0.01672	0.03707	0.4511	468	>0.999999
histone H4 [Drosophila melanogaster]	No	0.652111	0.01678	0.0335	-0.01672	0.03707	0.4511	468	>0.999999
histone H4 replacement, isoform D [Drosophila melanogaster]	No	0.652111	0.01678	0.0335	-0.01672	0.03707	0.4511	468	>0.999999
Cluster of ribosomal protein L34b, isoform D [Drosophila melanogaster] (NP_001287250.1)	No	0.667618	0.008396	0.02432	-0.01593	0.03707	0.4297	468	>0.999999
ribosomal protein L34b, isoform D [Drosophila melanogaster]	No	0.733292	0.008396	0.02103	-0.01264	0.03707	0.341	468	>0.999999
ribosomal protein L34a, isoform C [Drosophila melanogaster]	No	0.779909	0.002793	0.01316	-0.01036	0.03707	0.2796	468	>0.999999
tropomyosin 2, isoform G [Drosophila melanogaster]	No	0.941128	0.008427	0.01117	-0.002739	0.03707	0.07389	468	>0.999999
ribosomal protein L6, isoform B [Drosophila melanogaster]	No	0.658222	0.0112	0.02761	-0.01641	0.03707	0.4427	468	>0.999999
rasputin, isoform G [Drosophila melanogaster]	No	0.705415	0.0419	0.05592	-0.01402	0.03707	0.3783	468	>0.999999
ribosomal protein L13, isoform C [Drosophila melanogaster]	No	0.960446	0.01958	0.01775	0.001839	0.03707	0.04962	468	>0.999999
Cluster of papilin, isoform E [Drosophila melanogaster] (NP_788752.2)	No	>0.999999	0	0	0	0.03707	0	468	>0.999999
papilin, isoform E [Drosophila melanogaster]	No	>0.999999	0	0	0	0.03707	0	468	>0.999999
papilin, isoform G [Drosophila melanogaster]	No	>0.999999	0	0	0	0.03707	0	468	>0.999999
ribosomal protein L14 [Drosophila melanogaster]	No	0.947832	0.02519	0.02761	-0.002427	0.03707	0.06546	468	>0.999999
ribosomal protein L37A, isoform C [Drosophila melanogaster]	No	0.701918	0.02519	0.03938	-0.0142	0.03707	0.383	468	>0.999999
ribosomal protein S9, isoform E [Drosophila melanogaster]	No	0.842753	0.008396	0.01575	-0.007358	0.03707	0.1985	468	>0.999999
Ran, isoform D [Drosophila melanogaster]	No	0.989479	0.01397	0.01446	-0.0004891	0.03707	0.01319	468	>0.999999
Chain C, Porcine E-Trypsin	No	0.908914	0.01679	0.02103	-0.004243	0.03707	0.1145	468	>0.999999
ribosomal protein S17 [Drosophila melanogaster]	No	0.764316	0.02238	0.0335	-0.01112	0.03707	0.3	468	>0.999999
ribosomal protein S29, isoform B [Drosophila melanogaster]	No	0.988836	0.008396	0.007877	0.000519	0.03707	0.014	468	>0.999999
megalin, isoform E [Drosophila melanogaster]	No	>0.999999	0	0	0	0.03707	0	468	>0.999999
Cluster of heat shock protein 60A, isoform B [Drosophila melanogaster] (NP_727489.1)	No	0.929328	0	0.003289	-0.003289	0.03707	0.08874	468	>0.999999
heat shock protein 60A, isoform B [Drosophila melanogaster]	No	0.929328	0	0.003289	-0.003289	0.03707	0.08874	468	>0.999999
heat shock protein 60C, isoform B [Drosophila melanogaster]	No	>0.999999	0	0	0	0.03707	0	468	>0.999999
ribosomal protein L19, isoform B [Drosophila melanogaster]	No	0.759605	0.01955	0.0309	-0.01135	0.03707	0.3062	468	>0.999999
Cluster of Rab35, isoform D [Drosophila melanogaster] (NP_001259739.1)	No	0.961762	0.002809	0.004587	-0.001778	0.03707	0.04797	468	>0.999999
Rab35, isoform D [Drosophila melanogaster]	No	0.961762	0.002809	0.004587	-0.001778	0.03707	0.04797	468	>0.999999
Rab10 [Drosophila melanogaster]	No	0.961762	0.002809	0.004587	-0.001778	0.03707	0.04797	468	>0.999999
Rab1 [Drosophila melanogaster]	No	0.961762	0.002809	0.004587	-0.001778	0.03707	0.04797	468	>0.999999
Rab8, isoform C [Drosophila melanogaster]	No	0.939629	0.002809	0	0.002809	0.03707	0.07578	468	>0.999999
Rab26, isoform E [Drosophila melanogaster]	No	>0.999999	0	0	0	0.03707	0	468	>0.999999
Rab14, isoform B [Drosophila melanogaster]	No	>0.999999	0	0	0	0.03707	0	468	>0.999999
Rab26, isoform G [Drosophila melanogaster]	No	>0.999999	0	0	0	0.03707	0	468	>0.999999
Rab4, isoform A [Drosophila melanogaster]	No	>0.999999	0	0	0	0.03707	0	468	>0.999999
Rab3 [Drosophila melanogaster]	No	>0.999999	0	0	0	0.03707	0	468	>0.999999
belphegor, isoform B [Drosophila melanogaster]	No	0.394904	0.04472	0.01316	0.03157	0.03707	0.8515	468	>0.999999
ribosomal protein L26, isoform C [Drosophila melanogaster]	No	0.890167	0.008411	0.003289	0.005122	0.03707	0.1382	468	>0.999999
ribosomal protein L12, isoform C [Drosophila melanogaster]	No	0.737776	0.02238	0.0348	-0.01242	0.03707	0.335	468	>0.999999
ribosomal protein L27, isoform D [Drosophila melanogaster]	No	0.989816	0.01398	0.01446	-0.0004734	0.03707	0.01277	468	>0.999999
ribosomal protein L18A [Drosophila melanogaster]	No	0.890502	0.008396	0.003289	0.005106	0.03707	0.1377	468	>0.999999
abnormal spindle [Drosophila melanogaster]	No	0.919526	0.014	0.01775	-0.003747	0.03707	0.1011	468	>0.999999
Cluster of tropomyosin 1, isoform O [Drosophila melanogaster] (NP_732001.3)	No	0.891322	0.002809	0.007877	-0.005068	0.03707	0.1367	468	>0.999999
tropomyosin 1, isoform O [Drosophila melanogaster]	No	0.891322	0.002809	0.007877	-0.005068	0.03707	0.1367	468	>0.999999
tropomyosin 1, isoform E [Drosophila melanogaster]	No	0.961762	0.002809	0.004587	-0.001778	0.03707	0.04797	468	>0.999999
tropomyosin 1, isoform H [Drosophila melanogaster]	No	0.939629	0.002809	0	0.002809	0.03707	0.07578	468	>0.999999
tropomyosin 1, isoform R [Drosophila melanogaster]	No	>0.999999	0	0	0	0.03707	0	468	>0.999999
ribosomal protein S10b, isoform E [Drosophila melanogaster]	No	0.880423	0.005587	0.01117	-0.00558	0.03707	0.1505	468	>0.999999
ribosomal protein L3, isoform H [Drosophila melanogaster]	No	0.978654	0.005587	0.006579	-0.0009924	0.03707	0.02677	468	>0.999999
14-3-3epsilon, isoform A [Drosophila melanogaster]	No	0.923276	0.005602	0.009174	-0.003572	0.03707	0.09636	468	>0.999999
ubiquitin activating enzyme 5 [Drosophila melanogaster]	No	0.94667	0.01397	0.01645	-0.002481	0.03707	0.06693	468	>0.999999
ribosomal protein L15, isoform I [Drosophila melanogaster]	No	0.978654	0.005587	0.006579	-0.0009924	0.03707	0.02677	468	>0.999999
eukaryotic initiation factor 4E, isoform I [Drosophila melanogaster]	No	0.943572	0.02236	0.01974	0.002625	0.03707	0.07082	468	>0.999999
ribosomal protein S5b, isoform A [Drosophila melanogaster]	No	0.82188	0.01398	0.02233	-0.00835	0.03707	0.2253	468	>0.999999
ribosomal protein S13, isoform C [Drosophila melanogaster]	No	0.907789	0.01676	0.01246	0.004296	0.03707	0.1159	468	>0.999999
ribosomal protein L23 [Drosophila melanogaster]	No	0.870031	0.01955	0.02562	-0.006069	0.03707	0.1637	468	>0.999999
CG5726 [Drosophila melanogaster]	No	0.796685	0.01676	0.02632	-0.009556	0.03707	0.2578	468	>0.999999
Tcp1-like, isoform B [Drosophila melanogaster]	No	0.555001	0.02519	0.003289	0.0219	0.03707	0.5907	468	>0.999999
ribosomal protein L36A, isoform B [Drosophila melanogaster]	No	0.717087	0.005602	0.01904	-0.01344	0.03707	0.3626	468	>0.999999
Cluster of G protein alpha s subunit, isoform D [Drosophila melanogaster] (NP_001163283.1)	No	>0.999999	0	0	0	0.03707	0	468	>0.999999
G protein alpha s subunit, isoform D [Drosophila melanogaster]	No	>0.999999	0	0	0	0.03707	0	468	>0.999999
G protein alpha o subunit, isoform H [Drosophila melanogaster]	No	>0.999999	0	0	0	0.03707	0	468	>0.999999
G protein alpha i subunit [Drosophila melanogaster]	No	>0.999999	0	0	0	0.03707	0	468	>0.999999
Cluster of ribosomal protein L13A, isoform B [Drosophila melanogaster] (NP_649560.1)	No	0.929328	0	0.003289	-0.003289	0.03707	0.08874	468	>0.999999
ribosomal protein L13A, isoform B [Drosophila melanogaster]	No	0.929328	0	0.003289	-0.003289	0.03707	0.08874	468	>0.999999
ribosomal protein L13A, isoform C [Drosophila melanogaster]	No	>0.999999	0	0	0	0.03707	0	468	>0.999999
zipper, isoform D [Drosophila melanogaster]	No	0.441194	0.005618	0.03419	-0.02857	0.03707	0.7708	468	>0.999999
ribosomal protein S26, isoform E [Drosophila melanogaster]	No	0.983401	0.01957	0.02034	-0.0007717	0.03707	0.02082	468	>0.999999
Cluster of Fmr1, isoform G [Drosophila melanogaster] (NP_001247017.1)	No	0.865832	0.01676	0.02303	-0.006267	0.03707	0.169	468	>0.999999
Fmr1, isoform G [Drosophila melanogaster]	No	0.865832	0.01676	0.02303	-0.006267	0.03707	0.169	468	>0.999999
Fmr1, isoform H [Drosophila melanogaster]	No	0.827811	0.00838	0.01645	-0.008067	0.03707	0.2176	468	>0.999999
CG4586 [Drosophila melanogaster]	No	0.725722	0.03076	0.01775	0.01301	0.03707	0.351	468	>0.999999
ribosomal protein S2, isoform C [Drosophila melanogaster]	No	0.933267	0.01955	0.01645	0.003106	0.03707	0.08378	468	>0.999999
Rab11, isoform A [Drosophila melanogaster]	No	>0.999999	0	0	0	0.03707	0	468	>0.999999
ribosomal protein L30, isoform E [Drosophila melanogaster]	No	0.82188	0.01398	0.02233	-0.00835	0.03707	0.2253	468	>0.999999
histone H2B [Drosophila melanogaster]	No	0.972579	0.01119	0.01246	-0.001275	0.03707	0.03439	468	>0.999999
ribosomal protein L32, isoform C [Drosophila melanogaster]	No	0.827811	0.00838	0.01645	-0.008067	0.03707	0.2176	468	>0.999999
chorion protein 36 [Drosophila melanogaster]	No	0.411185	0.005602	0.03609	-0.03049	0.03707	0.8225	468	>0.999999
yellow-g [Drosophila melanogaster]	No	0.174108	0	0.05046	-0.05046	0.03707	1.361	468	>0.999999
uncharacterized protein Dmel_CG17018, isoform C [Drosophila melanogaster]	No	0.881575	0.01681	0.02233	-0.005525	0.03707	0.1491	468	>0.999999
ribosomal protein S4, isoform C [Drosophila melanogaster]	No	0.77407	0.008396	0.01904	-0.01065	0.03707	0.2872	468	>0.999999
ribosomal protein L11, isoform B [Drosophila melanogaster]	No	0.848867	0.01397	0.02103	-0.007068	0.03707	0.1907	468	>0.999999
casein kappa [Bos taurus]	No	0.76338	0	0.01117	-0.01117	0.03707	0.3012	468	>0.999999
rudimentary, isoform E [Drosophila melanogaster]	No	0.869881	0.00838	0.01446	-0.006076	0.03707	0.1639	468	>0.999999
heterogeneous nuclear ribonucleoprotein at 27C, isoform H [Drosophila melanogaster]	No	0.767015	0.03073	0.01974	0.01099	0.03707	0.2965	468	>0.999999
Cluster of eukaryotic initiation factor 4a, isoform F [Drosophila melanogaster] (NP_001260117.1)	No	0.8529	0.005587	0.01246	-0.006877	0.03707	0.1855	468	>0.999999
eukaryotic initiation factor 4a, isoform F [Drosophila melanogaster]	No	0.950767	0.005587	0.007877	-0.00229	0.03707	0.06178	468	>0.999999
eIF4AIII [Drosophila melanogaster]	No	0.890987	0.002793	0.007877	-0.005083	0.03707	0.1371	468	>0.999999
Cluster of Glutamyl-prolyl-tRNA synthetase, isoform A [Drosophila melanogaster] (NP_524471.2)	No	0.821254	0.00838	0	0.00838	0.03707	0.2261	468	>0.999999
Glutamyl-prolyl-tRNA synthetase, isoform A [Drosophila melanogaster]	No	0.821254	0.00838	0	0.00838	0.03707	0.2261	468	>0.999999
Glutamyl-prolyl-tRNA synthetase, isoform B [Drosophila melanogaster]	No	0.880273	0.005587	0	0.005587	0.03707	0.1507	468	>0.999999
Cluster of sterol carrier protein X-related thiolase [Drosophila melanogaster] (NP_524715.2)	No	0.547862	0.0112	0.0335	-0.02229	0.03707	0.6014	468	>0.999999
sterol carrier protein X-related thiolase [Drosophila melanogaster]	No	0.547862	0.0112	0.0335	-0.02229	0.03707	0.6014	468	>0.999999
uncharacterized protein Dmel_CG17597, isoform B [Drosophila melanogaster]	No	>0.999999	0	0	0	0.03707	0	468	>0.999999
IGF-II mRNA-binding protein, isoform K [Drosophila melanogaster]	No	0.911684	0.01398	0.009868	0.004114	0.03707	0.111	468	>0.999999
uncharacterized protein Dmel_CG17754, isoform G [Drosophila melanogaster]	No	0.939966	0.002793	0	0.002793	0.03707	0.07535	468	>0.999999
malic enzyme, isoform B [Drosophila melanogaster]	No	0.281279	0	0.03999	-0.03999	0.03707	1.079	468	>0.999999
uncharacterized protein Dmel_CG12262 [Drosophila melanogaster]	No	0.647829	0.002793	0.01974	-0.01694	0.03707	0.4571	468	>0.999999
lost [Drosophila melanogaster]	No	0.712788	0.002793	0.01645	-0.01365	0.03707	0.3683	468	>0.999999
ribosomal protein L21, isoform C [Drosophila melanogaster]	No	0.890836	0.00838	0.003289	0.00509	0.03707	0.1373	468	>0.999999
Cluster of wing blister, isoform G [Drosophila melanogaster] (NP_476790.3-DECOY)	No	>0.999999	0	0	0	0.03707	0	468	>0.999999
wing blister, isoform G [Drosophila melanogaster]	No	>0.999999	0	0	0	0.03707	0	468	>0.999999
wing blister, isoform F [Drosophila melanogaster]	No	>0.999999	0	0	0	0.03707	0	468	>0.999999
GTPase activating protein and centrosome-associated, isoform B [Drosophila melanogaster]	No	0.651089	0.01678	0	0.01678	0.03707	0.4525	468	>0.999999
alpha spectrin, isoform B [Drosophila melanogaster]	No	0.790192	0	0.009868	-0.009868	0.03707	0.2662	468	>0.999999
ribosomal protein L17, isoform E [Drosophila melanogaster]	No	0.700694	0.002793	0.01705	-0.01426	0.03707	0.3846	468	>0.999999
ribosomal protein S5a, isoform D [Drosophila melanogaster]	No	0.999848	0.01117	0.01117	7.08e-06	0.03707	0.000191	468	>0.999999
Cluster of adenosylhomocysteinase like 1 [Drosophila melanogaster] (NP_647746.1)	No	>0.999999	0	0	0	0.03707	0	468	>0.999999
adenosylhomocysteinase like 1 [Drosophila melanogaster]	No	>0.999999	0	0	0	0.03707	0	468	>0.999999
adenosylhomocysteinase like 2, isoform D [Drosophila melanogaster]	No	>0.999999	0	0	0	0.03707	0	468	>0.999999
TER94, isoform E [Drosophila melanogaster]	No	>0.999999	0	0	0	0.03707	0	468	>0.999999
mitochondrial trifunctional protein alpha subunit, isoform A [Drosophila melanogaster]	No	0.870214	0.008396	0.01446	-0.00606	0.03707	0.1635	468	>0.999999
glycoprotein 93 [Drosophila melanogaster]	No	>0.999999	0	0	0	0.03707	0	468	>0.999999
Cluster of lipophorin receptor 1, isoform K [Drosophila melanogaster] (NP_001097934.2)	No	0.804638	0	0.009174	-0.009174	0.03707	0.2475	468	>0.999999
lipophorin receptor 1, isoform K [Drosophila melanogaster]	No	0.804638	0	0.009174	-0.009174	0.03707	0.2475	468	>0.999999
lipophorin receptor 1, isoform S [Drosophila melanogaster]	No	>0.999999	0	0	0	0.03707	0	468	>0.999999
heat shock protein cognate 5, isoform B [Drosophila melanogaster]	No	0.722785	0	0.01316	-0.01316	0.03707	0.355	468	>0.999999
non-claret disjunctional, isoform B [Drosophila melanogaster]	No	0.94667	0.01397	0.01645	-0.002481	0.03707	0.06693	468	>0.999999
regulatory particle triple-A ATPase 6 [Drosophila melanogaster]	No	0.950615	0.005587	0.003289	0.002297	0.03707	0.06197	468	>0.999999
ribosomal protein L9, isoform C [Drosophila melanogaster]	No	0.762912	0.01119	0	0.01119	0.03707	0.3018	468	>0.999999
Rab7, isoform C [Drosophila melanogaster]	No	>0.999999	0	0	0	0.03707	0	468	>0.999999
chorion protein b at 7F, isoform A [Drosophila melanogaster]	No	0.804638	0	0.009174	-0.009174	0.03707	0.2475	468	>0.999999
Gamma-interferon-inducible lysosomal thiol reductase 1 [Drosophila melanogaster]	No	0.757578	0.005602	0.01705	-0.01145	0.03707	0.3088	468	>0.999999
lethal (1) G0156, isoform C [Drosophila melanogaster]	No	0.908092	0.005587	0.009868	-0.004282	0.03707	0.1155	468	>0.999999
Lon protease, isoform C [Drosophila melanogaster]	No	0.706519	0.01397	0	0.01397	0.03707	0.3768	468	>0.999999
clathrin heavy chain, isoform G [Drosophila melanogaster]	No	>0.999999	0	0	0	0.03707	0	468	>0.999999
deadhead, isoform B [Drosophila melanogaster]	No	0.55101	0.002809	0.02493	-0.02212	0.03707	0.5967	468	>0.999999
spindle assembly abnormal 4 [Drosophila melanogaster]	No	0.706519	0.01397	0	0.01397	0.03707	0.3768	468	>0.999999
Cluster of G protein alpha q subunit, isoform D [Drosophila melanogaster] (NP_725196.1)	No	>0.999999	0	0	0	0.03707	0	468	>0.999999
G protein alpha q subunit, isoform D [Drosophila melanogaster]	No	>0.999999	0	0	0	0.03707	0	468	>0.999999
uncharacterized protein Dmel_CG30054, isoform E [Drosophila melanogaster]	No	>0.999999	0	0	0	0.03707	0	468	>0.999999
uncharacterized protein Dmel_CG30054, isoform F [Drosophila melanogaster]	No	>0.999999	0	0	0	0.03707	0	468	>0.999999
chorion protein a at 7F [Drosophila melanogaster]	No	0.216541	0	0.04587	-0.04587	0.03707	1.237	468	>0.999999
uncharacterized protein Dmel_CG15293, isoform C [Drosophila melanogaster]	No	0.939966	0.002793	0	0.002793	0.03707	0.07535	468	>0.999999
belle, isoform B [Drosophila melanogaster]	No	>0.999999	0	0	0	0.03707	0	468	>0.999999
beta spectrin, isoform A [Drosophila melanogaster]	No	>0.999999	0	0	0	0.03707	0	468	>0.999999
ribosomal protein L35A [Drosophila melanogaster]	No	0.989326	0.002793	0.003289	-0.0004962	0.03707	0.01339	468	>0.999999
yellow-g2 [Drosophila melanogaster]	No	0.386817	0	0.03211	-0.03211	0.03707	0.8662	468	>0.999999
ribosomal protein L36, isoform E [Drosophila melanogaster]	No	0.929328	0	0.003289	-0.003289	0.03707	0.08874	468	>0.999999
succinate dehydrogenase, subunit A (flavoprotein), isoform C [Drosophila melanogaster]	No	>0.999999	0	0	0	0.03707	0	468	>0.999999
chorion protein 18 [Drosophila melanogaster]	No	0.336046	0.005587	0.04128	-0.0357	0.03707	0.963	468	>0.999999
uncharacterized protein Dmel_CG30069 [Drosophila melanogaster]	No	0.73685	0	0.01246	-0.01246	0.03707	0.3362	468	>0.999999
Rab5, isoform I [Drosophila melanogaster]	No	0.961762	0.002809	0.004587	-0.001778	0.03707	0.04797	468	>0.999999
IGH1M_MOUSE RecName: Full=Ig gamma-1 chain C region, membrane-bound form	No	0.989326	0.002793	0.003289	-0.0004962	0.03707	0.01339	468	>0.999999
La related protein, isoform H [Drosophila melanogaster]	No	0.763234	0.01117	0	0.01117	0.03707	0.3014	468	>0.999999
swallow [Drosophila melanogaster]	No	0.988161	0.008427	0.007877	0.0005503	0.03707	0.01485	468	>0.999999
wispy, isoform B [Drosophila melanogaster]	No	0.890502	0.008396	0.003289	0.005106	0.03707	0.1377	468	>0.999999
ribosomal protein L31, isoform C [Drosophila melanogaster]	No	0.918215	0.008396	0.004587	0.003808	0.03707	0.1027	468	>0.999999
argonaute 2, isoform B [Drosophila melanogaster]	No	0.890167	0.008411	0.003289	0.005122	0.03707	0.1382	468	>0.999999
Isoleucyl-tRNA synthetase, isoform D [Drosophila melanogaster]	No	0.706205	0.01398	0	0.01398	0.03707	0.3772	468	>0.999999
Rap1 GTPase, isoform C [Drosophila melanogaster]	No	>0.999999	0	0	0	0.03707	0	468	>0.999999
CG8507 [Drosophila melanogaster]	No	0.908092	0.005587	0.009868	-0.004282	0.03707	0.1155	468	>0.999999
transforming acidic coiled-coil protein, isoform N [Drosophila melanogaster]	No	0.977827	0.005618	0.004587	0.001031	0.03707	0.02781	468	>0.999999
ribosomal protein S24 [Drosophila melanogaster]	No	0.940118	0.00838	0.01117	-0.002786	0.03707	0.07516	468	>0.999999
gamma-Tubulin at 37C, isoform B [Drosophila melanogaster]	No	0.950767	0.005587	0.007877	-0.00229	0.03707	0.06178	468	>0.999999
female-specific independent of transformer [Drosophila melanogaster]	No	0.989326	0.002793	0.003289	-0.0004962	0.03707	0.01339	468	>0.999999
T-cp1zeta [Drosophila melanogaster]	No	0.939966	0.002793	0	0.002793	0.03707	0.07535	468	>0.999999
CG8036, isoform D [Drosophila melanogaster]	No	0.929328	0	0.003289	-0.003289	0.03707	0.08874	468	>0.999999
peroxin 14 [Drosophila melanogaster]	No	0.880423	0.005587	0.01117	-0.00558	0.03707	0.1505	468	>0.999999
regulatory particle triple-A ATPase 1 [Drosophila melanogaster]	No	>0.999999	0	0	0	0.03707	0	468	>0.999999
uncharacterized protein Dmel_CG13084 [Drosophila melanogaster]	No	0.620847	0	0.01835	-0.01835	0.03707	0.495	468	>0.999999
bonus, isoform B [Drosophila melanogaster]	No	0.821403	0.002793	0.01117	-0.008373	0.03707	0.2259	468	>0.999999
uncharacterized protein Dmel_CG15735 [Drosophila melanogaster]	No	0.978992	0.005602	0.006579	-0.0009767	0.03707	0.02635	468	>0.999999
uncharacterized protein Dmel_CG13364 [Drosophila melanogaster]	No	>0.999999	0	0	0	0.03707	0	468	>0.999999
Lysyl-tRNA synthetase, isoform C [Drosophila melanogaster]	No	0.950615	0.005587	0.003289	0.002297	0.03707	0.06197	468	>0.999999
Grip71 [Drosophila melanogaster]	No	0.978654	0.005587	0.006579	-0.0009924	0.03707	0.02677	468	>0.999999
elongation factor 1 beta, isoform C [Drosophila melanogaster]	No	>0.999999	0	0	0	0.03707	0	468	>0.999999
Aspartyl-tRNA synthetase, isoform B [Drosophila melanogaster]	No	0.880273	0.005587	0	0.005587	0.03707	0.1507	468	>0.999999
roadkill, isoform C [Drosophila melanogaster]	No	0.960935	0.008396	0.006579	0.001817	0.03707	0.04901	468	>0.999999
ADP ribosylation factor at 102F, isoform B [Drosophila melanogaster]	No	0.939629	0.002809	0	0.002809	0.03707	0.07578	468	>0.999999

## Sheet: WT v 9A statistics
Figure 1-Source Data 3
Results for multiple t-test statistical analysis of normalized total spectrum counts for GNU-WT-GFP vs. GNU-9A-GFP.
	Discovery?	P value	Mean of Gnu-WT-GFP	Mean of Gnu-9A-GFP	Difference	SE of difference	t ratio	df	q value
Cluster of giant nuclei [Drosophila melanogaster] (NP_648726.1)	No	>0.999999	1	1	0	0.05041	0	682	0.959648
giant nuclei [Drosophila melanogaster]	Yes	<0.000001	1	0.663	0.337	0.05041	6.686	682	<0.000001
GNU_9A protein[Drosophila melanogaster]	Yes	<0.000001	0.3994	1	-0.6006	0.05041	11.91	682	<0.000001
Cluster of ribosomal protein S27A [Drosophila melanogaster] (NP_476778.1)	Yes	0.000156	0.1682	0.3599	-0.1917	0.05041	3.802	682	0.004264
ribosomal protein S27A [Drosophila melanogaster]	No	0.015471	0.1542	0.2765	-0.1224	0.05041	2.427	682	0.202511
ribosomal protein L40, isoform B [Drosophila melanogaster]	No	0.001007	0.1094	0.2759	-0.1665	0.05041	3.303	682	0.016479
Ubiquitin-63E, isoform D [Drosophila melanogaster]	No	>0.999999	0	0	0	0.05041	0	682	0.959648
Cluster of heat shock protein cognate 4, isoform G [Drosophila melanogaster] (NP_001262586.1)	Yes	0.000452	0.21	0.3877	-0.1777	0.05041	3.525	682	0.008697
heat shock protein cognate 4, isoform G [Drosophila melanogaster]	Yes	0.00045	0.2043	0.3821	-0.1778	0.05041	3.526	682	0.008697
heat shock protein cognate 1, isoform A [Drosophila melanogaster]	No	0.493554	0.04201	0.07654	-0.03453	0.05041	0.685	682	0.959648
Cluster of actin 5C, isoform E [Drosophila melanogaster] (NP_001284915.1)	Yes	0.000188	0.1317	0.321	-0.1893	0.05041	3.755	682	0.004736
actin 5C, isoform E [Drosophila melanogaster]	Yes	9.7e-05	0.1233	0.321	-0.1977	0.05041	3.922	682	0.002882
actin 57B [Drosophila melanogaster]	No	0.001125	0.09806	0.263	-0.1649	0.05041	3.271	682	0.017537
actin 88F [Drosophila melanogaster]	No	0.000927	0.09527	0.263	-0.1677	0.05041	3.326	682	0.015961
actin 79B, isoform B [Drosophila melanogaster]	No	0.040454	0.09527	0.1988	-0.1035	0.05041	2.053	682	0.456487
Actin-related protein 53D [Drosophila melanogaster]	No	0.91228	0	0.005556	-0.005556	0.05041	0.1102	682	0.959648
ribosomal protein S3, isoform B [Drosophila melanogaster]	Yes	8.1e-05	0.1902	0.3901	-0.2	0.05041	3.967	682	0.002639
heat shock 70-kDa protein cognate 3, isoform E [Drosophila melanogaster]	No	0.615743	0.1512	0.1765	-0.02531	0.05041	0.5021	682	0.959648
ribosomal protein S25, isoform B [Drosophila melanogaster]	Yes	0.000302	0.06996	0.2531	-0.1831	0.05041	3.633	682	0.007049
Cluster of twins, isoform I [Drosophila melanogaster] (NP_001287269.1)	No	0.233252	0.1342	0.07407	0.06015	0.05041	1.193	682	0.959648
twins, isoform I [Drosophila melanogaster]	No	0.233252	0.1342	0.07407	0.06015	0.05041	1.193	682	0.959648
twins, isoform H [Drosophila melanogaster]	No	0.305	0.1258	0.07407	0.05175	0.05041	1.027	682	0.959648
uncharacterized protein Dmel_CG33308 [Drosophila melanogaster]	No	0.739176	0.01679	0	0.01679	0.05041	0.3331	682	0.959648
Cluster of beta-Tubulin at 56D, isoform B [Drosophila melanogaster] (NP_523795.2)	No	0.131667	0.1147	0.1907	-0.07609	0.05041	1.509	682	0.959648
beta-Tubulin at 56D, isoform B [Drosophila melanogaster]	No	0.074476	0.1007	0.1907	-0.09006	0.05041	1.786	682	0.77763
beta-Tubulin at 85D [Drosophila melanogaster]	No	0.681594	0.04474	0.06543	-0.02069	0.05041	0.4105	682	0.959648
beta-Tubulin at 60D, isoform A [Drosophila melanogaster]	No	0.55651	0.04195	0.0716	-0.02966	0.05041	0.5883	682	0.959648
beta-Tubulin at 97EF, isoform B [Drosophila melanogaster]	No	>0.999999	0	0	0	0.05041	0	682	0.959648
yolk protein 2, isoform B [Drosophila melanogaster]	No	0.000563	0.04198	0.2167	-0.1747	0.05041	3.465	682	0.010234
ribosomal protein L38, isoform B [Drosophila melanogaster]	No	0.100232	0.05591	0.1389	-0.08298	0.05041	1.646	682	0.911111
Cluster of yolk protein 3, isoform B [Drosophila melanogaster] (NP_001285228.1)	No	0.078419	0.04201	0.1309	-0.08885	0.05041	1.763	682	0.77763
yolk protein 3, isoform B [Drosophila melanogaster]	No	0.078419	0.04201	0.1309	-0.08885	0.05041	1.763	682	0.77763
uncharacterized protein Dmel_CG34447, isoform B [Drosophila melanogaster]	No	>0.999999	0	0	0	0.05041	0	682	0.959648
CG5665, isoform C [Drosophila melanogaster]	No	>0.999999	0	0	0	0.05041	0	682	0.959648
CG5162, isoform B [Drosophila melanogaster]	No	>0.999999	0	0	0	0.05041	0	682	0.959648
yolk protein 1, isoform B [Drosophila melanogaster]	No	0.006086	0.02795	0.1667	-0.1387	0.05041	2.752	682	0.082985
ribosomal protein L22 [Drosophila melanogaster]	Yes	<0.000001	0.07269	0.3321	-0.2594	0.05041	5.146	682	1.4e-05
poly(A) binding protein, isoform C [Drosophila melanogaster]	No	0.065002	0.179	0.0858	0.09317	0.05041	1.848	682	0.709043
Cluster of defective chorion 1, isoform G [Drosophila melanogaster] (NP_001245569.1)	Yes	<0.000001	0.008396	0.3012	-0.2928	0.05041	5.809	682	<0.000001
defective chorion 1, isoform G [Drosophila melanogaster]	Yes	<0.000001	0.008396	0.3012	-0.2928	0.05041	5.809	682	<0.000001
defective chorion 1, isoform E [Drosophila melanogaster]	Yes	<0.000001	0.008396	0.3012	-0.2928	0.05041	5.809	682	<0.000001
ribosomal protein L29, isoform D [Drosophila melanogaster]	Yes	0.000376	0.04204	0.2222	-0.1802	0.05041	3.574	682	0.008205
twenty-four, isoform N [Drosophila melanogaster]	No	0.003991	0.1956	0.05	0.1456	0.05041	2.889	682	0.056783
Cluster of bicaudal C, isoform B [Drosophila melanogaster] (NP_723948.1)	Yes	<0.000001	0.2935	0.02778	0.2657	0.05041	5.271	682	9e-06
bicaudal C, isoform B [Drosophila melanogaster]	Yes	<0.000001	0.2935	0.02778	0.2657	0.05041	5.271	682	9e-06
bicaudal C, isoform D [Drosophila melanogaster]	Yes	2e-06	0.2599	0.01667	0.2433	0.05041	4.826	682	6.3e-05
eukaryotic translation initiation factor 4G, isoform B [Drosophila melanogaster]	No	0.77693	0.03077	0.04506	-0.01429	0.05041	0.2834	682	0.959648
Cluster of stress-sensitive B, isoform E [Drosophila melanogaster] (NP_001285090.1)	No	0.472389	0.06437	0.1006	-0.03625	0.05041	0.719	682	0.959648
stress-sensitive B, isoform E [Drosophila melanogaster]	No	0.472389	0.06437	0.1006	-0.03625	0.05041	0.719	682	0.959648
adenine nucleotide translocase 2, isoform C [Drosophila melanogaster]	No	0.981699	0.01119	0.01235	-0.001157	0.05041	0.02295	682	0.959648
Cluster of ypsilon schachtel, isoform B [Drosophila melanogaster] (NP_001246730.1)	No	0.108994	0.1426	0.06173	0.0809	0.05041	1.605	682	0.938422
ypsilon schachtel, isoform B [Drosophila melanogaster]	No	0.108994	0.1426	0.06173	0.0809	0.05041	1.605	682	0.938422
ypsilon schachtel, isoform A [Drosophila melanogaster]	No	0.167059	0.1315	0.06173	0.06973	0.05041	1.383	682	0.959648
Cluster of protein phosphatase 2A at 29B, isoform A [Drosophila melanogaster] (NP_001027227.1)	No	0.728307	0.08665	0.06914	0.01752	0.05041	0.3475	682	0.959648
protein phosphatase 2A at 29B, isoform A [Drosophila melanogaster]	No	0.728307	0.08665	0.06914	0.01752	0.05041	0.3475	682	0.959648
protein phosphatase 2A at 29B, isoform D [Drosophila melanogaster]	No	0.77029	0.08386	0.06914	0.01473	0.05041	0.2921	682	0.959648
Cluster of elongation factor 1alpha48D, isoform E [Drosophila melanogaster] (NP_001286322.1)	No	0.741084	0.03642	0.05309	-0.01666	0.05041	0.3306	682	0.959648
elongation factor 1alpha48D, isoform E [Drosophila melanogaster]	No	0.741084	0.03642	0.05309	-0.01666	0.05041	0.3306	682	0.959648
elongation factor 1alpha100E, isoform C [Drosophila melanogaster]	No	0.699645	0.03363	0.05309	-0.01946	0.05041	0.386	682	0.959648
ribosomal protein L24, isoform C [Drosophila melanogaster]	No	0.807804	0.01119	0.02346	-0.01227	0.05041	0.2434	682	0.959648
ribosomal protein L7A, isoform F [Drosophila melanogaster]	No	0.001791	0.04195	0.2	-0.1581	0.05041	3.135	682	0.026638
Cluster of myosin heavy chain, isoform U [Drosophila melanogaster] (NP_001246051.1)	No	0.867781	0.008396	0	0.008396	0.05041	0.1665	682	0.959648
myosin heavy chain, isoform U [Drosophila melanogaster]	No	0.867781	0.008396	0	0.008396	0.05041	0.1665	682	0.959648
myosin heavy chain, isoform O [Drosophila melanogaster]	No	0.867781	0.008396	0	0.008396	0.05041	0.1665	682	0.959648
myosin heavy chain, isoform F [Drosophila melanogaster]	No	0.911792	0.005587	0	0.005587	0.05041	0.1108	682	0.959648
myosin heavy chain, isoform P [Drosophila melanogaster]	No	0.867781	0.008396	0	0.008396	0.05041	0.1665	682	0.959648
Cluster of trailer hitch, isoform C [Drosophila melanogaster] (NP_001261770.1)	No	0.202058	0.123	0.05864	0.06437	0.05041	1.277	682	0.959648
trailer hitch, isoform C [Drosophila melanogaster]	No	0.202058	0.123	0.05864	0.06437	0.05041	1.277	682	0.959648
trailer hitch, isoform D [Drosophila melanogaster]	No	0.291803	0.1118	0.05864	0.05318	0.05041	1.055	682	0.959648
CG3800, isoform B [Drosophila melanogaster]	No	0.496829	0.04474	0.07901	-0.03427	0.05041	0.6799	682	0.959648
Cluster of alpha-Tubulin at 84B [Drosophila melanogaster] (NP_476772.1)	No	0.579756	0.06713	0.09506	-0.02793	0.05041	0.554	682	0.959648
alpha-Tubulin at 84B [Drosophila melanogaster]	No	0.579756	0.06713	0.09506	-0.02793	0.05041	0.554	682	0.959648
alpha-Tubulin at 85E [Drosophila melanogaster]	No	0.602983	0.04476	0.07099	-0.02623	0.05041	0.5204	682	0.959648
ribosomal protein S8, isoform G [Drosophila melanogaster]	No	0.246028	0.05875	0.1173	-0.05853	0.05041	1.161	682	0.959648
fibrillarin [Drosophila melanogaster]	No	0.451468	0.05588	0.0179	0.03798	0.05041	0.7534	682	0.959648
ribosomal protein S14b, isoform B [Drosophila melanogaster]	No	0.11184	0.08394	0.1642	-0.08026	0.05041	1.592	682	0.938422
ribosomal protein S27, isoform B [Drosophila melanogaster]	No	0.264273	0.06713	0.1235	-0.05632	0.05041	1.117	682	0.959648
Cluster of heat shock protein 68 [Drosophila melanogaster] (NP_524474.1)	No	0.426751	0.04201	0.0821	-0.04009	0.05041	0.7952	682	0.959648
heat shock protein 68 [Drosophila melanogaster]	No	0.981007	0.04201	0.04321	-0.001201	0.05041	0.02382	682	0.959648
Heat-shock-protein-70Ab [Drosophila melanogaster]	No	>0.999999	0	0	0	0.05041	0	682	0.959648
Heat-shock-protein-70Ba [Drosophila melanogaster]	No	>0.999999	0	0	0	0.05041	0	682	0.959648
ribosomal protein S3A, isoform F [Drosophila melanogaster]	No	0.783524	0.04479	0.05864	-0.01386	0.05041	0.2748	682	0.959648
ribosomal protein S7, isoform E [Drosophila melanogaster]	No	0.478429	0.04758	0.08333	-0.03575	0.05041	0.7092	682	0.959648
ribosomal protein S19a, isoform E [Drosophila melanogaster]	No	0.730224	0.03076	0.04815	-0.01739	0.05041	0.345	682	0.959648
heat shock protein 27, isoform B [Drosophila melanogaster]	No	0.016873	0.03357	0.1543	-0.1208	0.05041	2.395	682	0.212363
ribosomal protein S18, isoform B [Drosophila melanogaster]	No	0.032728	0.02238	0.1302	-0.1079	0.05041	2.14	682	0.396668
ribosomal protein S23, isoform B [Drosophila melanogaster]	No	0.757111	0.05045	0.06605	-0.0156	0.05041	0.3094	682	0.959648
maternal expression at 31B, isoform A [Drosophila melanogaster]	No	0.387815	0.03915	0.08272	-0.04356	0.05041	0.8641	682	0.959648
ribosomal protein L8, isoform B [Drosophila melanogaster]	No	0.036369	0.02516	0.1309	-0.1057	0.05041	2.097	682	0.425055
microtubule star, isoform C [Drosophila melanogaster]	No	0.875482	0.03074	0.02284	0.007902	0.05041	0.1568	682	0.959648
alpha-Tubulin at 67C [Drosophila melanogaster]	No	0.336185	0.03914	0.08765	-0.04852	0.05041	0.9624	682	0.959648
ribosomal protein L4 [Drosophila melanogaster]	No	0.192137	0.03912	0.1049	-0.06582	0.05041	1.306	682	0.959648
Ataxin-2, isoform B [Drosophila melanogaster]	No	0.222088	0.07272	0.01111	0.06161	0.05041	1.222	682	0.959648
Cluster of ribosomal protein S11, isoform C [Drosophila melanogaster] (NP_725114.1)	No	0.520773	0.03922	0.0716	-0.03239	0.05041	0.6425	682	0.959648
ribosomal protein S11, isoform C [Drosophila melanogaster]	No	0.520773	0.03922	0.0716	-0.03239	0.05041	0.6425	682	0.959648
ribosomal protein S11, isoform B [Drosophila melanogaster]	No	0.825423	0.03641	0.04753	-0.01112	0.05041	0.2207	682	0.959648
ribosomal protein L10, isoform E [Drosophila melanogaster]	No	0.324194	0.03915	0.08889	-0.04974	0.05041	0.9866	682	0.959648
Cluster of glyceraldehyde 3 phosphate dehydrogenase 2, isoform C [Drosophila melanogaster] (NP_001259584.1)	No	0.235831	0.01117	0.07099	-0.05981	0.05041	1.187	682	0.959648
glyceraldehyde 3 phosphate dehydrogenase 2, isoform C [Drosophila melanogaster]	No	0.287674	0.01117	0.06481	-0.05364	0.05041	1.064	682	0.959648
glyceraldehyde 3 phosphate dehydrogenase 1, isoform B [Drosophila melanogaster]	No	0.405681	0.005587	0.04753	-0.04194	0.05041	0.832	682	0.959648
heat shock protein cognate 2 [Drosophila melanogaster]	No	0.314837	0.01966	0.07037	-0.05071	0.05041	1.006	682	0.959648
thioredoxin peroxidase 1, isoform E [Drosophila melanogaster]	No	0.492773	0.03639	0.07099	-0.0346	0.05041	0.6863	682	0.959648
ribosomal protein L27A, isoform D [Drosophila melanogaster]	No	0.657738	0.02519	0.04753	-0.02234	0.05041	0.4432	682	0.959648
pyruvate kinase, isoform A [Drosophila melanogaster]	No	0.804734	0.03074	0.04321	-0.01247	0.05041	0.2473	682	0.959648
ribosomal protein S16, isoform B [Drosophila melanogaster]	No	0.486055	0.04758	0.08272	-0.03514	0.05041	0.697	682	0.959648
ribosomal protein L23A [Drosophila melanogaster]	No	0.253678	0.01957	0.07716	-0.05759	0.05041	1.142	682	0.959648
heat shock protein 83, isoform B [Drosophila melanogaster]	No	0.430827	0.008411	0.04815	-0.03974	0.05041	0.7882	682	0.959648
ribosomal protein S6, isoform B [Drosophila melanogaster]	No	0.188113	0.03358	0.1	-0.06642	0.05041	1.318	682	0.959648
cup, isoform C [Drosophila melanogaster]	No	0.900103	0.06991	0.06358	0.006331	0.05041	0.1256	682	0.959648
ribosomal protein L28, isoform G [Drosophila melanogaster]	No	0.400364	0.02239	0.06481	-0.04242	0.05041	0.8415	682	0.959648
ribosomal protein L10Ab, isoform A [Drosophila melanogaster]	No	0.472736	0.02798	0.0642	-0.03622	0.05041	0.7184	682	0.959648
heat shock protein 26, isoform B [Drosophila melanogaster]	No	0.465037	0.02796	0.06481	-0.03685	0.05041	0.731	682	0.959648
CG2233 [Drosophila melanogaster]	No	0.955828	0.002793	0	0.002793	0.05041	0.05541	682	0.959648
glycogen synthase, isoform A [Drosophila melanogaster]	No	0.832075	0.014	0.02469	-0.01069	0.05041	0.2121	682	0.959648
ribosomal protein S20 [Drosophila melanogaster]	No	0.506946	0.02517	0.05864	-0.03347	0.05041	0.664	682	0.959648
14-3-3zeta, isoform F [Drosophila melanogaster]	No	0.765211	0.008396	0.02346	-0.01506	0.05041	0.2988	682	0.959648
ribosomal protein L18, isoform C [Drosophila melanogaster]	No	0.283688	0.03357	0.08765	-0.05409	0.05041	1.073	682	0.959648
ribosomal protein L7, isoform B [Drosophila melanogaster]	No	0.14411	0.00838	0.0821	-0.07372	0.05041	1.462	682	0.959648
bellwether [Drosophila melanogaster]	No	0.328399	0.01119	0.06049	-0.0493	0.05041	0.978	682	0.959648
Cluster of histone H4 [Drosophila melanogaster] (NP_001027382.1)	No	0.625965	0.01678	0.04136	-0.02458	0.05041	0.4876	682	0.959648
histone H4 [Drosophila melanogaster]	No	0.625965	0.01678	0.04136	-0.02458	0.05041	0.4876	682	0.959648
histone H4 replacement, isoform D [Drosophila melanogaster]	No	0.625965	0.01678	0.04136	-0.02458	0.05041	0.4876	682	0.959648
Cluster of ribosomal protein L34b, isoform D [Drosophila melanogaster] (NP_001287250.1)	No	0.090594	0.008396	0.09383	-0.08543	0.05041	1.695	682	0.847025
ribosomal protein L34b, isoform D [Drosophila melanogaster]	No	0.090594	0.008396	0.09383	-0.08543	0.05041	1.695	682	0.847025
ribosomal protein L34a, isoform C [Drosophila melanogaster]	No	0.520735	0.002793	0.03519	-0.03239	0.05041	0.6425	682	0.959648
tropomyosin 2, isoform G [Drosophila melanogaster]	No	0.867292	0.008427	0	0.008427	0.05041	0.1672	682	0.959648
ribosomal protein L6, isoform B [Drosophila melanogaster]	No	0.19538	0.0112	0.07654	-0.06534	0.05041	1.296	682	0.959648
rasputin, isoform G [Drosophila melanogaster]	No	0.874757	0.0419	0.03395	0.007949	0.05041	0.1577	682	0.959648
ribosomal protein L13, isoform C [Drosophila melanogaster]	No	0.876207	0.01958	0.01173	0.007856	0.05041	0.1558	682	0.959648
Cluster of papilin, isoform E [Drosophila melanogaster] (NP_788752.2)	No	>0.999999	0	0	0	0.05041	0	682	0.959648
papilin, isoform E [Drosophila melanogaster]	No	>0.999999	0	0	0	0.05041	0	682	0.959648
papilin, isoform G [Drosophila melanogaster]	No	>0.999999	0	0	0	0.05041	0	682	0.959648
ribosomal protein L14 [Drosophila melanogaster]	No	0.588553	0.02519	0.05247	-0.02728	0.05041	0.5412	682	0.959648
ribosomal protein L37A, isoform C [Drosophila melanogaster]	No	0.982397	0.02519	0.02407	0.001113	0.05041	0.02207	682	0.959648
ribosomal protein S9, isoform E [Drosophila melanogaster]	No	0.682692	0.008396	0.02901	-0.02062	0.05041	0.409	682	0.959648
Ran, isoform D [Drosophila melanogaster]	No	0.423701	0.01397	0.05432	-0.04035	0.05041	0.8005	682	0.959648
Chain C, Porcine E-Trypsin	No	0.894846	0.01679	0.02346	-0.006666	0.05041	0.1322	682	0.959648
ribosomal protein S17 [Drosophila melanogaster]	No	0.895333	0.02238	0.02901	-0.006635	0.05041	0.1316	682	0.959648
ribosomal protein S29, isoform B [Drosophila melanogaster]	No	0.937567	0.008396	0.01235	-0.00395	0.05041	0.07836	682	0.959648
megalin, isoform E [Drosophila melanogaster]	No	0.90258	0	0.006173	-0.006173	0.05041	0.1224	682	0.959648
Cluster of heat shock protein 60A, isoform B [Drosophila melanogaster] (NP_727489.1)	No	0.713476	0	0.01852	-0.01852	0.05041	0.3673	682	0.959648
heat shock protein 60A, isoform B [Drosophila melanogaster]	No	0.713476	0	0.01852	-0.01852	0.05041	0.3673	682	0.959648
heat shock protein 60C, isoform B [Drosophila melanogaster]	No	0.90258	0	0.006173	-0.006173	0.05041	0.1224	682	0.959648
ribosomal protein L19, isoform B [Drosophila melanogaster]	No	0.137849	0.01955	0.09444	-0.07489	0.05041	1.486	682	0.959648
Cluster of Rab35, isoform D [Drosophila melanogaster] (NP_001259739.1)	No	0.859615	0.002809	0.01173	-0.008919	0.05041	0.1769	682	0.959648
Rab35, isoform D [Drosophila melanogaster]	No	0.946818	0.002809	0.006173	-0.003364	0.05041	0.06673	682	0.959648
Rab10 [Drosophila melanogaster]	No	0.95558	0.002809	0	0.002809	0.05041	0.05572	682	0.959648
Rab1 [Drosophila melanogaster]	No	0.95558	0.002809	0	0.002809	0.05041	0.05572	682	0.959648
Rab8, isoform C [Drosophila melanogaster]	No	0.956567	0.002809	0.005556	-0.002747	0.05041	0.05448	682	0.959648
Rab26, isoform E [Drosophila melanogaster]	No	0.816102	0	0.01173	-0.01173	0.05041	0.2327	682	0.959648
Rab14, isoform B [Drosophila melanogaster]	No	0.91228	0	0.005556	-0.005556	0.05041	0.1102	682	0.959648
Rab26, isoform G [Drosophila melanogaster]	No	>0.999999	0	0	0	0.05041	0	682	0.959648
Rab4, isoform A [Drosophila melanogaster]	No	>0.999999	0	0	0	0.05041	0	682	0.959648
Rab3 [Drosophila melanogaster]	No	>0.999999	0	0	0	0.05041	0	682	0.959648
belphegor, isoform B [Drosophila melanogaster]	No	0.840395	0.04472	0.03457	0.01016	0.05041	0.2015	682	0.959648
ribosomal protein L26, isoform C [Drosophila melanogaster]	No	0.189028	0.008411	0.07469	-0.06628	0.05041	1.315	682	0.959648
ribosomal protein L12, isoform C [Drosophila melanogaster]	No	0.876002	0.02238	0.03025	-0.007869	0.05041	0.1561	682	0.959648
ribosomal protein L27, isoform D [Drosophila melanogaster]	No	0.445458	0.01398	0.05247	-0.03849	0.05041	0.7635	682	0.959648
ribosomal protein L18A [Drosophila melanogaster]	No	0.268718	0.008396	0.0642	-0.0558	0.05041	1.107	682	0.959648
abnormal spindle [Drosophila melanogaster]	No	0.683372	0.014	0.03457	-0.02057	0.05041	0.408	682	0.959648
Cluster of tropomyosin 1, isoform O [Drosophila melanogaster] (NP_732001.3)	No	0.95558	0.002809	0	0.002809	0.05041	0.05572	682	0.959648
tropomyosin 1, isoform O [Drosophila melanogaster]	No	0.95558	0.002809	0	0.002809	0.05041	0.05572	682	0.959648
tropomyosin 1, isoform E [Drosophila melanogaster]	No	0.95558	0.002809	0	0.002809	0.05041	0.05572	682	0.959648
tropomyosin 1, isoform H [Drosophila melanogaster]	No	0.95558	0.002809	0	0.002809	0.05041	0.05572	682	0.959648
tropomyosin 1, isoform R [Drosophila melanogaster]	No	>0.999999	0	0	0	0.05041	0	682	0.959648
ribosomal protein S10b, isoform E [Drosophila melanogaster]	No	0.704825	0.005587	0.02469	-0.0191	0.05041	0.379	682	0.959648
ribosomal protein L3, isoform H [Drosophila melanogaster]	No	0.281892	0.005587	0.05988	-0.05429	0.05041	1.077	682	0.959648
14-3-3epsilon, isoform A [Drosophila melanogaster]	No	0.557515	0.005602	0.03519	-0.02958	0.05041	0.5868	682	0.959648
ubiquitin activating enzyme 5 [Drosophila melanogaster]	No	0.647355	0.01397	0.03704	-0.02307	0.05041	0.4576	682	0.959648
ribosomal protein L15, isoform I [Drosophila melanogaster]	No	0.199196	0.005587	0.07037	-0.06478	0.05041	1.285	682	0.959648
eukaryotic initiation factor 4E, isoform I [Drosophila melanogaster]	No	0.910082	0.02236	0.01667	0.005695	0.05041	0.113	682	0.959648
ribosomal protein S5b, isoform A [Drosophila melanogaster]	No	0.841392	0.01398	0.02407	-0.01009	0.05041	0.2002	682	0.959648
ribosomal protein S13, isoform C [Drosophila melanogaster]	No	0.80804	0.01676	0.02901	-0.01225	0.05041	0.243	682	0.959648
ribosomal protein L23 [Drosophila melanogaster]	No	0.928567	0.01955	0.02407	-0.004521	0.05041	0.08968	682	0.959648
CG5726 [Drosophila melanogaster]	No	0.910816	0.01676	0.01111	0.005649	0.05041	0.1121	682	0.959648
dynein heavy chain 64C, isoform E [Drosophila melanogaster]	No	>0.999999	0	0	0	0.05041	0	682	0.959648
Cluster of jabba, isoform C [Drosophila melanogaster] (NP_001137703.1)	No	0.798813	0.01678	0.02963	-0.01285	0.05041	0.255	682	0.959648
jabba, isoform C [Drosophila melanogaster]	No	0.798813	0.01678	0.02963	-0.01285	0.05041	0.255	682	0.959648
jabba, isoform I [Drosophila melanogaster]	No	0.756357	0.01398	0.02963	-0.01565	0.05041	0.3104	682	0.959648
Tcp1-like, isoform B [Drosophila melanogaster]	No	0.748472	0.02519	0.04136	-0.01617	0.05041	0.3208	682	0.959648
ribosomal protein L36A, isoform B [Drosophila melanogaster]	No	0.990973	0.005602	0.006173	-0.0005706	0.05041	0.01132	682	0.959648
Cluster of ATP synthase, beta subunit, isoform D [Drosophila melanogaster] (NP_001284719.1)	No	0.859371	0.002793	0.01173	-0.008935	0.05041	0.1772	682	0.959648
ATP synthase, beta subunit, isoform D [Drosophila melanogaster]	No	0.859371	0.002793	0.01173	-0.008935	0.05041	0.1772	682	0.959648
ATP synthase, beta subunit-like [Drosophila melanogaster]	No	>0.999999	0	0	0	0.05041	0	682	0.959648
Cluster of G protein alpha s subunit, isoform D [Drosophila melanogaster] (NP_001163283.1)	No	0.91228	0	0.005556	-0.005556	0.05041	0.1102	682	0.959648
G protein alpha s subunit, isoform D [Drosophila melanogaster]	No	0.91228	0	0.005556	-0.005556	0.05041	0.1102	682	0.959648
G protein alpha o subunit, isoform H [Drosophila melanogaster]	No	0.91228	0	0.005556	-0.005556	0.05041	0.1102	682	0.959648
G protein alpha i subunit [Drosophila melanogaster]	No	0.91228	0	0.005556	-0.005556	0.05041	0.1102	682	0.959648
concertina, isoform B [Drosophila melanogaster]	No	>0.999999	0	0	0	0.05041	0	682	0.959648
elongation factor 2, isoform C [Drosophila melanogaster]	No	0.673284	0.002809	0.02407	-0.02127	0.05041	0.4218	682	0.959648
megator, isoform B [Drosophila melanogaster]	No	0.824177	0.0112	0	0.0112	0.05041	0.2223	682	0.959648
Cluster of ribosomal protein L13A, isoform B [Drosophila melanogaster] (NP_649560.1)	No	0.485443	0	0.03519	-0.03519	0.05041	0.698	682	0.959648
ribosomal protein L13A, isoform B [Drosophila melanogaster]	No	0.485443	0	0.03519	-0.03519	0.05041	0.698	682	0.959648
ribosomal protein L13A, isoform C [Drosophila melanogaster]	No	0.816102	0	0.01173	-0.01173	0.05041	0.2327	682	0.959648
zipper, isoform D [Drosophila melanogaster]	No	0.911299	0.005618	0	0.005618	0.05041	0.1114	682	0.959648
ribosomal protein S26, isoform E [Drosophila melanogaster]	No	0.790527	0.01957	0.006173	0.0134	0.05041	0.2657	682	0.959648
Cluster of Fmr1, isoform G [Drosophila melanogaster] (NP_001247017.1)	No	0.910816	0.01676	0.01111	0.005649	0.05041	0.1121	682	0.959648
Fmr1, isoform G [Drosophila melanogaster]	No	0.910816	0.01676	0.01111	0.005649	0.05041	0.1121	682	0.959648
Fmr1, isoform H [Drosophila melanogaster]	No	0.956809	0.00838	0.01111	-0.002731	0.05041	0.05418	682	0.959648
CG4586 [Drosophila melanogaster]	No	0.617289	0.03076	0.005556	0.0252	0.05041	0.4999	682	0.959648
cysteine proteinase-1, isoform C [Drosophila melanogaster]	No	0.928078	0.01397	0.01852	-0.004552	0.05041	0.0903	682	0.959648
ribosomal protein S2, isoform C [Drosophila melanogaster]	No	0.938299	0.01955	0.02346	-0.003904	0.05041	0.07744	682	0.959648
Rab11, isoform A [Drosophila melanogaster]	No	0.91228	0	0.005556	-0.005556	0.05041	0.1102	682	0.959648
ribosomal protein L30, isoform E [Drosophila melanogaster]	No	0.59573	0.01398	0.04074	-0.02676	0.05041	0.5308	682	0.959648
histone H2B [Drosophila melanogaster]	No	0.714626	0.01119	0.02963	-0.01844	0.05041	0.3658	682	0.959648
ribosomal protein L32, isoform C [Drosophila melanogaster]	No	0.673506	0.00838	0.02963	-0.02125	0.05041	0.4215	682	0.959648
chorion protein 36 [Drosophila melanogaster]	No	0.633784	0.005602	0.02963	-0.02403	0.05041	0.4766	682	0.959648
yellow-g [Drosophila melanogaster]	No	>0.999999	0	0	0	0.05041	0	682	0.959648
uncharacterized protein Dmel_CG17018, isoform C [Drosophila melanogaster]	No	0.738941	0.01681	0	0.01681	0.05041	0.3334	682	0.959648
ribosomal protein S4, isoform C [Drosophila melanogaster]	No	0.850494	0.008396	0.0179	-0.009506	0.05041	0.1886	682	0.959648
ribosomal protein L11, isoform B [Drosophila melanogaster]	No	0.75612	0.01397	0.02963	-0.01566	0.05041	0.3107	682	0.959648
casein kappa [Bos taurus]	No	0.722624	0	0.0179	-0.0179	0.05041	0.3551	682	0.959648
rudimentary, isoform E [Drosophila melanogaster]	No	0.868026	0.00838	0	0.00838	0.05041	0.1662	682	0.959648
heterogeneous nuclear ribonucleoprotein at 27C, isoform H [Drosophila melanogaster]	No	0.617728	0.03073	0.005556	0.02517	0.05041	0.4993	682	0.959648
DnaJ-like-2, isoform E [Drosophila melanogaster]	No	0.586639	0.00838	0.0358	-0.02742	0.05041	0.544	682	0.959648
Cluster of eukaryotic initiation factor 4a, isoform F [Drosophila melanogaster] (NP_001260117.1)	No	0.633563	0.005587	0.02963	-0.02404	0.05041	0.4769	682	0.959648
eukaryotic initiation factor 4a, isoform F [Drosophila melanogaster]	No	0.633563	0.005587	0.02963	-0.02404	0.05041	0.4769	682	0.959648
eIF4AIII [Drosophila melanogaster]	No	0.764504	0.002793	0.0179	-0.01511	0.05041	0.2997	682	0.959648
Cluster of Glutamyl-prolyl-tRNA synthetase, isoform A [Drosophila melanogaster] (NP_524471.2)	No	0.868026	0.00838	0	0.00838	0.05041	0.1662	682	0.959648
Glutamyl-prolyl-tRNA synthetase, isoform A [Drosophila melanogaster]	No	0.868026	0.00838	0	0.00838	0.05041	0.1662	682	0.959648
Glutamyl-prolyl-tRNA synthetase, isoform B [Drosophila melanogaster]	No	0.911792	0.005587	0	0.005587	0.05041	0.1108	682	0.959648
Cluster of sterol carrier protein X-related thiolase [Drosophila melanogaster] (NP_524715.2)	No	0.910811	0.0112	0.005556	0.005649	0.05041	0.1121	682	0.959648
sterol carrier protein X-related thiolase [Drosophila melanogaster]	No	0.910811	0.0112	0.005556	0.005649	0.05041	0.1121	682	0.959648
uncharacterized protein Dmel_CG17597, isoform B [Drosophila melanogaster]	No	>0.999999	0	0	0	0.05041	0	682	0.959648
IGF-II mRNA-binding protein, isoform K [Drosophila melanogaster]	No	0.867297	0.01398	0.005556	0.008427	0.05041	0.1672	682	0.959648
uncharacterized protein Dmel_CG17754, isoform G [Drosophila melanogaster]	No	0.94657	0.002793	0.006173	-0.00338	0.05041	0.06704	682	0.959648
malic enzyme, isoform B [Drosophila melanogaster]	No	0.80661	0	0.01235	-0.01235	0.05041	0.2449	682	0.959648
uncharacterized protein Dmel_CG12262 [Drosophila melanogaster]	No	0.673057	0.002793	0.02407	-0.02128	0.05041	0.4221	682	0.959648
lost [Drosophila melanogaster]	No	0.956319	0.002793	0.005556	-0.002762	0.05041	0.05479	682	0.959648
ribosomal protein L21, isoform C [Drosophila melanogaster]	No	0.77433	0.00838	0.02284	-0.01446	0.05041	0.2868	682	0.959648
Cluster of wing blister, isoform G [Drosophila melanogaster] (NP_476790.3-DECOY)	No	>0.999999	0	0	0	0.05041	0	682	0.959648
wing blister, isoform G [Drosophila melanogaster]	No	>0.999999	0	0	0	0.05041	0	682	0.959648
wing blister, isoform F [Drosophila melanogaster]	No	>0.999999	0	0	0	0.05041	0	682	0.959648
GTPase activating protein and centrosome-associated, isoform B [Drosophila melanogaster]	No	0.8946	0.01678	0.02346	-0.006681	0.05041	0.1325	682	0.959648
alpha spectrin, isoform B [Drosophila melanogaster]	No	>0.999999	0	0	0	0.05041	0	682	0.959648
ribosomal protein L17, isoform E [Drosophila melanogaster]	No	0.603164	0.002793	0.02901	-0.02622	0.05041	0.5201	682	0.959648
ribosomal protein S5a, isoform D [Drosophila melanogaster]	No	0.981451	0.01117	0.01235	-0.001172	0.05041	0.02326	682	0.959648
Cluster of adenosylhomocysteinase like 1 [Drosophila melanogaster] (NP_647746.1)	No	0.371705	0	0.04506	-0.04506	0.05041	0.8939	682	0.959648
adenosylhomocysteinase like 1 [Drosophila melanogaster]	No	0.371705	0	0.04506	-0.04506	0.05041	0.8939	682	0.959648
adenosylhomocysteinase like 2, isoform D [Drosophila melanogaster]	No	0.91228	0	0.005556	-0.005556	0.05041	0.1102	682	0.959648
TER94, isoform E [Drosophila melanogaster]	No	>0.999999	0	0	0	0.05041	0	682	0.959648
mitochondrial trifunctional protein alpha subunit, isoform A [Drosophila melanogaster]	No	0.850494	0.008396	0.0179	-0.009506	0.05041	0.1886	682	0.959648
glycoprotein 93 [Drosophila melanogaster]	No	>0.999999	0	0	0	0.05041	0	682	0.959648
Cluster of lipophorin receptor 1, isoform K [Drosophila melanogaster] (NP_001097934.2)	No	>0.999999	0	0	0	0.05041	0	682	0.959648
lipophorin receptor 1, isoform K [Drosophila melanogaster]	No	>0.999999	0	0	0	0.05041	0	682	0.959648
lipophorin receptor 1, isoform S [Drosophila melanogaster]	No	>0.999999	0	0	0	0.05041	0	682	0.959648
heat shock protein cognate 5, isoform B [Drosophila melanogaster]	No	0.80661	0	0.01235	-0.01235	0.05041	0.2449	682	0.959648
non-claret disjunctional, isoform B [Drosophila melanogaster]	No	0.781827	0.01397	0	0.01397	0.05041	0.277	682	0.959648
regulatory particle triple-A ATPase 6 [Drosophila melanogaster]	No	0.549118	0.005587	0.0358	-0.03022	0.05041	0.5994	682	0.959648
ribosomal protein L9, isoform C [Drosophila melanogaster]	No	0.714626	0.01119	0.02963	-0.01844	0.05041	0.3658	682	0.959648
Rab7, isoform C [Drosophila melanogaster]	No	>0.999999	0	0	0	0.05041	0	682	0.959648
chorion protein b at 7F, isoform A [Drosophila melanogaster]	No	0.90258	0	0.006173	-0.006173	0.05041	0.1224	682	0.959648
Gamma-interferon-inducible lysosomal thiol reductase 1 [Drosophila melanogaster]	No	0.549325	0.005602	0.0358	-0.0302	0.05041	0.5991	682	0.959648
lethal (1) G0156, isoform C [Drosophila melanogaster]	No	0.633563	0.005587	0.02963	-0.02404	0.05041	0.4769	682	0.959648
Lon protease, isoform C [Drosophila melanogaster]	No	0.781827	0.01397	0	0.01397	0.05041	0.277	682	0.959648
clathrin heavy chain, isoform G [Drosophila melanogaster]	No	0.816102	0	0.01173	-0.01173	0.05041	0.2327	682	0.959648
deadhead, isoform B [Drosophila melanogaster]	No	0.682241	0.002809	0.02346	-0.02065	0.05041	0.4096	682	0.959648
spindle assembly abnormal 4 [Drosophila melanogaster]	No	0.781827	0.01397	0	0.01397	0.05041	0.277	682	0.959648
Cluster of G protein alpha q subunit, isoform D [Drosophila melanogaster] (NP_725196.1)	No	>0.999999	0	0	0	0.05041	0	682	0.959648
G protein alpha q subunit, isoform D [Drosophila melanogaster]	No	>0.999999	0	0	0	0.05041	0	682	0.959648
uncharacterized protein Dmel_CG30054, isoform E [Drosophila melanogaster]	No	>0.999999	0	0	0	0.05041	0	682	0.959648
uncharacterized protein Dmel_CG30054, isoform F [Drosophila melanogaster]	No	>0.999999	0	0	0	0.05041	0	682	0.959648
chorion protein a at 7F [Drosophila melanogaster]	No	>0.999999	0	0	0	0.05041	0	682	0.959648
uncharacterized protein Dmel_CG15293, isoform C [Drosophila melanogaster]	No	0.955828	0.002793	0	0.002793	0.05041	0.05541	682	0.959648
belle, isoform B [Drosophila melanogaster]	No	0.633125	0	0.02407	-0.02407	0.05041	0.4775	682	0.959648
beta spectrin, isoform A [Drosophila melanogaster]	No	>0.999999	0	0	0	0.05041	0	682	0.959648
ribosomal protein L35A [Drosophila melanogaster]	No	0.868995	0.002793	0.01111	-0.008318	0.05041	0.165	682	0.959648
yellow-g2 [Drosophila melanogaster]	No	0.90258	0	0.006173	-0.006173	0.05041	0.1224	682	0.959648
ribosomal protein L36, isoform E [Drosophila melanogaster]	No	0.419281	0	0.04074	-0.04074	0.05041	0.8082	682	0.959648
succinate dehydrogenase, subunit A (flavoprotein), isoform C [Drosophila melanogaster]	No	0.80661	0	0.01235	-0.01235	0.05041	0.2449	682	0.959648
Cluster of Rab6, isoform B [Drosophila melanogaster] (NP_001285869.1)	No	0.91228	0	0.005556	-0.005556	0.05041	0.1102	682	0.959648
Rab6, isoform B [Drosophila melanogaster]	No	0.91228	0	0.005556	-0.005556	0.05041	0.1102	682	0.959648
Rab39, isoform B [Drosophila melanogaster]	No	>0.999999	0	0	0	0.05041	0	682	0.959648
chorion protein 18 [Drosophila melanogaster]	No	0.990725	0.005587	0.006173	-0.0005863	0.05041	0.01163	682	0.959648
uncharacterized protein Dmel_CG30069 [Drosophila melanogaster]	No	>0.999999	0	0	0	0.05041	0	682	0.959648
Rab5, isoform I [Drosophila melanogaster]	No	0.95558	0.002809	0	0.002809	0.05041	0.05572	682	0.959648
IGH1M_MOUSE RecName: Full=Ig gamma-1 chain C region, membrane-bound form	No	0.955828	0.002793	0	0.002793	0.05041	0.05541	682	0.959648
La related protein, isoform H [Drosophila melanogaster]	No	0.921017	0.01117	0.006173	0.005	0.05041	0.09919	682	0.959648
chorion protein 19 [Drosophila melanogaster]	No	>0.999999	0	0	0	0.05041	0	682	0.959648
swallow [Drosophila melanogaster]	No	0.867292	0.008427	0	0.008427	0.05041	0.1672	682	0.959648
wispy, isoform B [Drosophila melanogaster]	No	0.95509	0.008396	0.005556	0.00284	0.05041	0.05634	682	0.959648
Sarco/endoplasmic reticulum Ca(2+)-ATPase, isoform A [Drosophila melanogaster]	No	0.90258	0	0.006173	-0.006173	0.05041	0.1224	682	0.959648
ribosomal protein L31, isoform C [Drosophila melanogaster]	No	0.755889	0.008396	0.02407	-0.01568	0.05041	0.311	682	0.959648
argonaute 2, isoform B [Drosophila melanogaster]	No	0.937815	0.008411	0.01235	-0.003934	0.05041	0.07805	682	0.959648
secreted Wg-interacting molecule, isoform B [Drosophila melanogaster]	No	>0.999999	0	0	0	0.05041	0	682	0.959648
Isoleucyl-tRNA synthetase, isoform D [Drosophila melanogaster]	No	0.781588	0.01398	0	0.01398	0.05041	0.2774	682	0.959648
Rap1 GTPase, isoform C [Drosophila melanogaster]	No	>0.999999	0	0	0	0.05041	0	682	0.959648
CG8507 [Drosophila melanogaster]	No	0.911792	0.005587	0	0.005587	0.05041	0.1108	682	0.959648
Rab2, isoform B [Drosophila melanogaster]	No	>0.999999	0	0	0	0.05041	0	682	0.959648
cyclophilin 1 [Drosophila melanogaster]	No	0.713476	0	0.01852	-0.01852	0.05041	0.3673	682	0.959648
prophenoloxidase 2 [Drosophila melanogaster]	No	0.755185	0.002793	0.01852	-0.01573	0.05041	0.3119	682	0.959648
transforming acidic coiled-coil protein, isoform N [Drosophila melanogaster]	No	0.911299	0.005618	0	0.005618	0.05041	0.1114	682	0.959648
sister of feo, isoform B [Drosophila melanogaster]	No	>0.999999	0	0	0	0.05041	0	682	0.959648
vitelline membrane 26Aa, isoform B [Drosophila melanogaster]	No	0.94657	0.002793	0.006173	-0.00338	0.05041	0.06704	682	0.959648
Cluster of wings up A, isoform A [Drosophila melanogaster] (NP_728141.1)	No	>0.999999	0	0	0	0.05041	0	682	0.959648
wings up A, isoform A [Drosophila melanogaster]	No	>0.999999	0	0	0	0.05041	0	682	0.959648
wings up A, isoform F [Drosophila melanogaster]	No	>0.999999	0	0	0	0.05041	0	682	0.959648
transferrin 1, isoform C [Drosophila melanogaster]	No	0.540582	0	0.03086	-0.03086	0.05041	0.6122	682	0.959648
chorion protein 15 [Drosophila melanogaster]	No	>0.999999	0	0	0	0.05041	0	682	0.959648
cctgamma, isoform D [Drosophila melanogaster]	No	0.80661	0	0.01235	-0.01235	0.05041	0.2449	682	0.959648
ribosomal protein S24 [Drosophila melanogaster]	No	0.868026	0.00838	0	0.00838	0.05041	0.1662	682	0.959648
gamma-Tubulin at 37C, isoform B [Drosophila melanogaster]	No	0.893381	0.005587	0.01235	-0.006759	0.05041	0.1341	682	0.959648
female-specific independent of transformer [Drosophila melanogaster]	No	0.859371	0.002793	0.01173	-0.008935	0.05041	0.1772	682	0.959648
CG4447 [Drosophila melanogaster]	No	0.80661	0	0.01235	-0.01235	0.05041	0.2449	682	0.959648
T-cp1zeta [Drosophila melanogaster]	No	0.849767	0.002793	0.01235	-0.009552	0.05041	0.1895	682	0.959648
CG8036, isoform D [Drosophila melanogaster]	No	0.713476	0	0.01852	-0.01852	0.05041	0.3673	682	0.959648
twinstar [Drosophila melanogaster]	No	0.713476	0	0.01852	-0.01852	0.05041	0.3673	682	0.959648
peroxin 14 [Drosophila melanogaster]	No	0.911792	0.005587	0	0.005587	0.05041	0.1108	682	0.959648
regulatory particle triple-A ATPase 1 [Drosophila melanogaster]	No	0.722624	0	0.0179	-0.0179	0.05041	0.3551	682	0.959648
uncharacterized protein Dmel_CG33923 [Drosophila melanogaster]	No	>0.999999	0	0	0	0.05041	0	682	0.959648
Cluster of vacuolar H[+] ATPase 68 kDa subunit 2, isoform F [Drosophila melanogaster] (NP_001260425.1)	No	>0.999999	0	0	0	0.05041	0	682	0.959648
vacuolar H[+] ATPase 68 kDa subunit 2, isoform F [Drosophila melanogaster]	No	>0.999999	0	0	0	0.05041	0	682	0.959648
vacuolar H[+] ATPase 68kD subunit 3 [Drosophila melanogaster]	No	>0.999999	0	0	0	0.05041	0	682	0.959648
Cluster of troponin C at 73F, isoform C [Drosophila melanogaster] (NP_001287091.1)	No	0.95558	0.002809	0	0.002809	0.05041	0.05572	682	0.959648
troponin C at 73F, isoform C [Drosophila melanogaster]	No	0.95558	0.002809	0	0.002809	0.05041	0.05572	682	0.959648
troponin C at 47D, isoform B [Drosophila melanogaster]	No	>0.999999	0	0	0	0.05041	0	682	0.959648
chorion protein 38, isoform B [Drosophila melanogaster]	No	>0.999999	0	0	0	0.05041	0	682	0.959648
roadkill, isoform C [Drosophila melanogaster]	No	0.867781	0.008396	0	0.008396	0.05041	0.1665	682	0.959648
ADP ribosylation factor at 102F, isoform B [Drosophila melanogaster]	No	0.95558	0.002809	0	0.002809	0.05041	0.05572	682	0.959648
Rho1, isoform F [Drosophila melanogaster]	No	>0.999999	0	0	0	0.05041	0	682	0.959648
Grip71 [Drosophila melanogaster]	No	0.911792	0.005587	0	0.005587	0.05041	0.1108	682	0.959648
elongation factor 1 beta, isoform C [Drosophila melanogaster]	No	0.90258	0	0.006173	-0.006173	0.05041	0.1224	682	0.959648
Aspartyl-tRNA synthetase, isoform B [Drosophila melanogaster]	No	0.999509	0.005587	0.005556	3.103e-05	0.05041	0.0006156	682	0.959648
IGHG_RABIT RecName: Full=Ig gamma chain C region	No	>0.999999	0	0	0	0.05041	0	682	0.959648
Rho guanine nucleotide exchange factor at 64C, isoform B [Drosophila melanogaster]	No	>0.999999	0	0	0	0.05041	0	682	0.959648
uncharacterized protein Dmel_CG13084 [Drosophila melanogaster]	No	>0.999999	0	0	0	0.05041	0	682	0.959648
bonus, isoform B [Drosophila melanogaster]	No	0.955828	0.002793	0	0.002793	0.05041	0.05541	682	0.959648
uncharacterized protein Dmel_CG15735 [Drosophila melanogaster]	No	0.999261	0.005602	0.005556	4.673e-05	0.05041	0.000927	682	0.959648
uncharacterized protein Dmel_CG13364 [Drosophila melanogaster]	No	0.80661	0	0.01235	-0.01235	0.05041	0.2449	682	0.959648
Cluster of Rac1, isoform B [Drosophila melanogaster] (NP_001261247.1)	No	>0.999999	0	0	0	0.05041	0	682	0.959648
Rac1, isoform B [Drosophila melanogaster]	No	>0.999999	0	0	0	0.05041	0	682	0.959648
Rac2, isoform B [Drosophila melanogaster]	No	>0.999999	0	0	0	0.05041	0	682	0.959648
Lysyl-tRNA synthetase, isoform C [Drosophila melanogaster]	No	0.911792	0.005587	0	0.005587	0.05041	0.1108	682	0.959648
uncharacterized protein Dmel_CG11876, isoform A [Drosophila melanogaster]	No	0.80661	0	0.01235	-0.01235	0.05041	0.2449	682	0.959648
CG7637 [Drosophila melanogaster]	No	>0.999999	0	0	0	0.05041	0	682	0.959648
atilla, isoform C [Drosophila melanogaster]	No	0.80661	0	0.01235	-0.01235	0.05041	0.2449	682	0.959648
THIO_ECOLI RecName: Full=Thioredoxin-1; Short=Trx-1	No	0.80661	0	0.01235	-0.01235	0.05041	0.2449	682	0.959648
Pi4KIIalpha, isoform B [Drosophila melanogaster]	No	>0.999999	0	0	0	0.05041	0	682	0.959648
CG8258 [Drosophila melanogaster]	No	0.90258	0	0.006173	-0.006173	0.05041	0.1224	682	0.959648
CG5525 [Drosophila melanogaster]	No	0.80661	0	0.01235	-0.01235	0.05041	0.2449	682	0.959648
uncharacterized protein Dmel_CG11381 [Drosophila melanogaster]	No	>0.999999	0	0	0	0.05041	0	682	0.959648

## Sheet: WT v H2Av Statistics
Figure 1-Source Data 3
Results for multiple t-test statistical analysis of normalized total spectrum counts for GNU-WT-GFP vs. H2Av-GFP.
Protein	Discovery?	P value	Mean of Gnu-wt-GFP	Mean of H2Av-GFP	Difference	SE of difference	t ratio	df	q value
GFP_AEQVI RecName: Full=Green fluorescent protein	No	>0.999999	1	1	0	0.05164	0	576	0.936354
giant nuclei [Drosophila melanogaster]	Yes	<0.000001	0.5173	0.002793	0.5145	0.05164	9.963	576	<0.000001
bicaudal C, isoform B [Drosophila melanogaster]	No	0.001853	0.1615	0	0.1615	0.05164	3.127	576	0.0196
twenty-four, isoform M [Drosophila melanogaster]	No	0.13324	0.1083	0.03065	0.07764	0.05164	1.504	576	0.684397
poly(A) binding protein, isoform C [Drosophila melanogaster]	No	0.147589	0.09722	0.02235	0.07488	0.05164	1.45	576	0.716036
Cluster of heat shock protein cognate 4, isoform G [Drosophila melanogaster] (NP_001262586.1)	Yes	<0.000001	0.108	0.3918	-0.2838	0.05164	5.495	576	2e-06
Cluster of ypsilon schachtel, isoform B [Drosophila melanogaster] (NP_001246730.1)	No	0.321355	0.07732	0.02607	0.05125	0.05164	0.9925	576	0.936354
twins, isoform I [Drosophila melanogaster]	No	0.157449	0.0731	0	0.0731	0.05164	1.416	576	0.725799
twenty-four, isoform N [Drosophila melanogaster]	No	0.151348	0.07419	0	0.07419	0.05164	1.437	576	0.716036
Cluster of beta-Tubulin at 56D, isoform B [Drosophila melanogaster] (NP_523795.2)	Yes	2e-06	0.06236	0.3122	-0.2499	0.05164	4.839	576	3e-05
heat shock 70-kDa protein cognate 3, isoform E [Drosophila melanogaster]	Yes	1.5e-05	0.0787	0.3039	-0.2252	0.05164	4.36	576	0.00023
protein phosphatase 2A at 29B, isoform A [Drosophila melanogaster]	No	0.466066	0.04232	0.004655	0.03766	0.05164	0.7294	576	0.936354
Ataxin-2, isoform B [Drosophila melanogaster]	No	0.513767	0.03933	0.005587	0.03374	0.05164	0.6534	576	0.936354
fibrillarin [Drosophila melanogaster]	No	0.639586	0.02978	0.005587	0.02419	0.05164	0.4685	576	0.936354
rasputin, isoform G [Drosophila melanogaster]	No	0.918642	0.02351	0.02879	-0.005277	0.05164	0.1022	576	0.936354
belphegor, isoform B [Drosophila melanogaster]	No	0.633936	0.0246	0	0.0246	0.05164	0.4764	576	0.936354
ribosomal protein L4 [Drosophila melanogaster]	Yes	<0.000001	0.02038	0.298	-0.2776	0.05164	5.376	576	3e-06
ribosomal protein L23A [Drosophila melanogaster]	No	0.520536	0.0332	0	0.0332	0.05164	0.6429	576	0.936354
heterogeneous nuclear ribonucleoprotein at 27C, isoform H [Drosophila melanogaster]	No	0.738585	0.01724	0	0.01724	0.05164	0.3339	576	0.936354
microtubule star, isoform C [Drosophila melanogaster]	No	0.761593	0.01567	0	0.01567	0.05164	0.3035	576	0.936354
ribosomal protein L18, isoform C [Drosophila melanogaster]	No	0.119934	0.0181	0.09852	-0.08042	0.05164	1.557	576	0.63417
heat shock protein 27, isoform B [Drosophila melanogaster]	No	0.767074	0.0181	0.002793	0.0153	0.05164	0.2963	576	0.936354
CG4586 [Drosophila melanogaster]	No	0.74554	0.01677	0	0.01677	0.05164	0.3247	576	0.936354
ribosomal protein S6, isoform B [Drosophila melanogaster]	No	0.282517	0.01786	0.0734	-0.05555	0.05164	1.076	576	0.936354
eukaryotic translation initiation factor 4G, isoform B [Drosophila melanogaster]	No	0.784589	0.01653	0.03065	-0.01412	0.05164	0.2735	576	0.936354
heat shock protein 26, isoform B [Drosophila melanogaster]	No	0.808229	0.01254	0	0.01254	0.05164	0.2428	576	0.936354
ribosomal protein L8, isoform B [Drosophila melanogaster]	No	0.012981	0.01254	0.1412	-0.1287	0.05164	2.492	576	0.089756
ribosomal protein L36A, isoform B [Drosophila melanogaster]	No	0.733048	0.01762	0	0.01762	0.05164	0.3412	576	0.936354
ribosomal protein L10Ab, isoform A [Drosophila melanogaster]	No	0.000901	0.01496	0.1873	-0.1723	0.05164	3.337	576	0.010801
ribosomal protein L23 [Drosophila melanogaster]	No	0.859403	0.01097	0.02012	-0.009151	0.05164	0.1772	576	0.936354
eukaryotic initiation factor 4E, isoform I [Drosophila melanogaster]	No	0.916975	0.01097	0.005587	0.005385	0.05164	0.1043	576	0.936354
ribosomal protein L14 [Drosophila melanogaster]	No	0.002127	0.01339	0.1727	-0.1594	0.05164	3.086	576	0.020122
Tcp1-like, isoform B [Drosophila melanogaster]	No	0.865679	0.01339	0.004655	0.008739	0.05164	0.1692	576	0.936354
ribosomal protein S17 [Drosophila melanogaster]	No	0.815359	0.01206	0	0.01206	0.05164	0.2336	576	0.936354
ribosomal protein S26, isoform E [Drosophila melanogaster]	No	0.855551	0.009405	0	0.009405	0.05164	0.1821	576	0.936354
ribosomal protein L23A [Drosophila melanogaster]	No	0.08884	0.009405	0.09742	-0.08801	0.05164	1.704	576	0.48399
Cluster of elongation factor 1alpha48D, isoform E [Drosophila melanogaster] (NP_001286322.1)	No	0.941087	0.009405	0.005587	0.003818	0.05164	0.07394	576	0.936354
Cluster of Fmr1, isoform G [Drosophila melanogaster] (NP_001247017.1)	No	0.883925	0.009405	0.001862	0.007542	0.05164	0.1461	576	0.936354
CG5726 [Drosophila melanogaster]	No	0.898171	0.009405	0.002793	0.006611	0.05164	0.128	576	0.936354
ribosomal protein L28, isoform G [Drosophila melanogaster]	No	0.44028	0.01183	0.0517	-0.03988	0.05164	0.7723	576	0.936354
spindle assembly abnormal 4 [Drosophila melanogaster]	No	0.879424	0.007837	0	0.007837	0.05164	0.1518	576	0.936354
histone H4 [Drosophila melanogaster]	Yes	1.8e-05	0.007837	0.2314	-0.2235	0.05164	4.329	576	0.000244
Lon protease, isoform C [Drosophila melanogaster]	No	0.879424	0.007837	0	0.007837	0.05164	0.1518	576	0.936354
GTPase activating protein and centrosome-associated, isoform B [Drosophila melanogaster]	No	0.879424	0.007837	0	0.007837	0.05164	0.1518	576	0.936354
lingerer, isoform D [Drosophila melanogaster]	No	0.950894	0.007837	0.004655	0.003182	0.05164	0.06161	576	0.936354
ribosomal protein L11, isoform B [Drosophila melanogaster]	No	0.979626	0.007837	0.006518	0.001319	0.05164	0.02555	576	0.936354
Cluster of jabba, isoform C [Drosophila melanogaster] (NP_001137703.1)	Yes	<0.000001	0.007837	3.137	-3.129	0.05164	60.6	576	<0.000001
ribosomal protein L30, isoform E [Drosophila melanogaster]	No	0.755658	0.00627	0.02235	-0.01608	0.05164	0.3113	576	0.936354
Isoleucyl-tRNA synthetase, isoform D [Drosophila melanogaster]	No	0.946352	0.00627	0.002793	0.003476	0.05164	0.06732	576	0.936354
ribosomal protein L27, isoform D [Drosophila melanogaster]	No	0.287673	0.00627	0.06122	-0.05495	0.05164	1.064	576	0.936354
La related protein, isoform H [Drosophila melanogaster]	No	0.903407	0.00627	0	0.00627	0.05164	0.1214	576	0.936354
IGF-II mRNA-binding protein, isoform K [Drosophila melanogaster]	No	0.975076	0.00627	0.004655	0.001614	0.05164	0.03126	576	0.936354
uncharacterized protein Dmel_CG17018, isoform E [Drosophila melanogaster]	No	0.866395	0.008692	0	0.008692	0.05164	0.1683	576	0.936354
abnormal spindle [Drosophila melanogaster]	No	0.886689	0.007362	0	0.007362	0.05164	0.1426	576	0.936354
ribosomal protein S24 [Drosophila melanogaster]	No	0.927479	0.004702	0	0.004702	0.05164	0.09106	576	0.936354
ribosomal protein L21, isoform C [Drosophila melanogaster]	No	0.80149	0.004702	0.01769	-0.01299	0.05164	0.2515	576	0.936354
ribosomal protein L9, isoform C [Drosophila melanogaster]	No	0.342764	0.004702	0.05373	-0.04903	0.05164	0.9495	576	0.936354
ribosomal protein L7, isoform B [Drosophila melanogaster]	No	0.002013	0.004702	0.1649	-0.1602	0.05164	3.102	576	0.02011
bellwether [Drosophila melanogaster]	No	0.010684	0.004702	0.137	-0.1323	0.05164	2.561	576	0.080033
glycogen synthase, isoform D [Drosophila melanogaster]	No	0.49152	0.004702	0.04025	-0.03554	0.05164	0.6883	576	0.936354
ribosomal protein S9, isoform E [Drosophila melanogaster]	No	0.569643	0.003135	0.03251	-0.02938	0.05164	0.5689	576	0.936354
wispy, isoform B [Drosophila melanogaster]	No	0.980344	0.003135	0.001862	0.001273	0.05164	0.02465	576	0.936354
Cluster of ribosomal protein L34b, isoform D [Drosophila melanogaster] (NP_001287250.1)	No	0.623429	0.003135	0.0285	-0.02537	0.05164	0.4913	576	0.936354
ribosomal protein L15, isoform I [Drosophila melanogaster]	No	0.214253	0.003135	0.06734	-0.0642	0.05164	1.243	576	0.936354
peroxin 14 [Drosophila melanogaster]	No	0.951611	0.003135	0	0.003135	0.05164	0.06071	576	0.936354
CG8507 [Drosophila melanogaster]	No	0.990897	0.003135	0.003724	-0.0005894	0.05164	0.01141	576	0.936354
Cluster of eukaryotic initiation factor 4a, isoform F [Drosophila melanogaster] (NP_001260117.1)	No	0.951611	0.003135	0	0.003135	0.05164	0.06071	576	0.936354
Cluster of regulatory particle triple-A ATPase 5 [Drosophila melanogaster] (NP_524464.1)	No	0.951611	0.003135	0	0.003135	0.05164	0.06071	576	0.936354
gamma-Tubulin at 37C, isoform B [Drosophila melanogaster]	No	0.947793	0.003135	0.006518	-0.003383	0.05164	0.06551	576	0.936354
Aspartyl-tRNA synthetase, isoform B [Drosophila melanogaster]	No	0.994723	0.003135	0.002793	0.0003417	0.05164	0.006617	576	0.936354
ribosomal protein S14b, isoform B [Drosophila melanogaster]	No	0.01592	0.01197	0.1368	-0.1249	0.05164	2.418	576	0.10222
Cluster of stress-sensitive B, isoform E [Drosophila melanogaster] (NP_001285090.1)	No	0.848855	0.01064	0.02048	-0.009846	0.05164	0.1907	576	0.936354
ribosomal protein S16, isoform B [Drosophila melanogaster]	No	0.780928	0.007979	0.02235	-0.01437	0.05164	0.2782	576	0.936354
protein phosphatase 2A at 29B, isoform D [Drosophila melanogaster]	No	0.917995	0.005319	0	0.005319	0.05164	0.103	576	0.936354
argonaute 2, isoform B [Drosophila melanogaster]	No	0.958943	0.00266	0	0.00266	0.05164	0.0515	576	0.936354
transforming acidic coiled-coil protein, isoform N [Drosophila melanogaster]	No	0.958943	0.00266	0	0.00266	0.05164	0.0515	576	0.936354
zipper, isoform D [Drosophila melanogaster]	No	0.958943	0.00266	0	0.00266	0.05164	0.0515	576	0.936354
glycogen synthase, isoform A [Drosophila melanogaster]	No	0.958943	0.00266	0	0.00266	0.05164	0.0515	576	0.936354
Na pump alpha subunit, isoform I [Drosophila melanogaster]	No	>0.999999	0	0	0	0.05164	0	576	0.936354
lipophorin receptor 1, isoform K [Drosophila melanogaster]	No	>0.999999	0	0	0	0.05164	0	576	0.936354
ribosomal protein L36A, isoform B [Drosophila melanogaster]	No	0.691747	0	0.02048	-0.02048	0.05164	0.3967	576	0.936354
Cluster of troponin C at 73F, isoform C [Drosophila melanogaster] (NP_001287091.1)	No	>0.999999	0	0	0	0.05164	0	576	0.936354
ribosomal protein L24, isoform C [Drosophila melanogaster]	No	0.856972	0	0.009311	-0.009311	0.05164	0.1803	576	0.936354
ADP ribosylation factor at 102F, isoform B [Drosophila melanogaster]	No	>0.999999	0	0	0	0.05164	0	576	0.936354
Rac2, isoform B [Drosophila melanogaster]	No	>0.999999	0	0	0	0.05164	0	576	0.936354
Rap1 GTPase, isoform C [Drosophila melanogaster]	No	>0.999999	0	0	0	0.05164	0	576	0.936354
Rho guanine nucleotide exchange factor at 64C, isoform B [Drosophila melanogaster]	No	>0.999999	0	0	0	0.05164	0	576	0.936354
Rho1, isoform F [Drosophila melanogaster]	No	>0.999999	0	0	0	0.05164	0	576	0.936354
Cluster of Rab6, isoform B [Drosophila melanogaster] (NP_001285869.1)	No	>0.999999	0	0	0	0.05164	0	576	0.936354
Rab7, isoform C [Drosophila melanogaster]	No	>0.999999	0	0	0	0.05164	0	576	0.936354
Gamma-interferon-inducible lysosomal thiol reductase 1 [Drosophila melanogaster]	No	0.745632	0	0.01676	-0.01676	0.05164	0.3246	576	0.936354
uncharacterized protein Dmel_CG30069 [Drosophila melanogaster]	No	>0.999999	0	0	0	0.05164	0	576	0.936354
uncharacterized protein Dmel_CG13084 [Drosophila melanogaster]	No	>0.999999	0	0	0	0.05164	0	576	0.936354
malic enzyme, isoform B [Drosophila melanogaster]	No	>0.999999	0	0	0	0.05164	0	576	0.936354
TER94, isoform C [Drosophila melanogaster]	No	>0.999999	0	0	0	0.05164	0	576	0.936354
transportin, isoform D [Drosophila melanogaster]	No	0.942528	0	0.003724	-0.003724	0.05164	0.07212	576	0.936354
eIF3-S8, isoform B [Drosophila melanogaster]	No	0.956879	0	0.002793	-0.002793	0.05164	0.05409	576	0.936354
Sarco/endoplasmic reticulum Ca(2+)-ATPase, isoform I [Drosophila melanogaster]	No	0.013892	0	0.1274	-0.1274	0.05164	2.468	576	0.092501
CAS/CSE1 segregation protein [Drosophila melanogaster]	No	0.971245	0	0.001862	-0.001862	0.05164	0.03606	576	0.936354
Methionyl-tRNA synthetase [Drosophila melanogaster]	No	0.971245	0	0.001862	-0.001862	0.05164	0.03606	576	0.936354
Ranbp9, isoform D [Drosophila melanogaster]	No	0.471958	0	0.03717	-0.03717	0.05164	0.7198	576	0.936354
ribosomal protein LP2 [Drosophila melanogaster]	No	0.773069	0	0.0149	-0.0149	0.05164	0.2885	576	0.936354
bonus, isoform B [Drosophila melanogaster]	No	>0.999999	0	0	0	0.05164	0	576	0.936354
karyopherin beta 3, isoform B [Drosophila melanogaster]	No	0.516519	0	0.03352	-0.03352	0.05164	0.6491	576	0.936354
RING-associated factor 2, isoform C [Drosophila melanogaster]	No	>0.999999	0	0	0	0.05164	0	576	0.936354
GRIP and coiled-coil domain containing 185 kDa [Drosophila melanogaster]	No	0.956879	0	0.002793	-0.002793	0.05164	0.05409	576	0.936354
CG7728 [Drosophila melanogaster]	No	0.79228	0	0.01361	-0.01361	0.05164	0.2635	576	0.936354
eIF3-S10, isoform D [Drosophila melanogaster]	No	0.956879	0	0.002793	-0.002793	0.05164	0.05409	576	0.936354
female-specific independent of transformer [Drosophila melanogaster]	No	>0.999999	0	0	0	0.05164	0	576	0.936354
histone H2B [Drosophila melanogaster]	No	0.08082	0	0.09032	-0.09032	0.05164	1.749	576	0.454057
histone H2B [Drosophila melanogaster]	No	>0.999999	0	0	0	0.05164	0	576	0.936354
hoi-polloi, isoform B [Drosophila melanogaster]	No	0.913885	0	0.005587	-0.005587	0.05164	0.1082	576	0.936354
ribosomal protein L36, isoform E [Drosophila melanogaster]	No	0.378117	0	0.04555	-0.04555	0.05164	0.8821	576	0.936354
golden goal [Drosophila melanogaster]	No	0.871142	0	0.00838	-0.00838	0.05164	0.1623	576	0.936354
atilla, isoform C [Drosophila melanogaster]	No	0.942528	0	0.003724	-0.003724	0.05164	0.07212	576	0.936354
Cluster of histone H2A variant, isoform B [Drosophila melanogaster] (NP_001262997.1)	Yes	<0.000001	0	0.5558	-0.5558	0.05164	10.76	576	<0.000001
ribosomal protein L31, isoform C [Drosophila melanogaster]	No	>0.999999	0	0	0	0.05164	0	576	0.936354
Cluster of host cell factor, isoform G [Drosophila melanogaster] (NP_995595.1)	No	0.79228	0	0.01361	-0.01361	0.05164	0.2635	576	0.936354
host cell factor, isoform G [Drosophila melanogaster]	No	0.613842	0	0.02607	-0.02607	0.05164	0.5049	576	0.936354
ATP synthase, delta subunit, isoform C [Drosophila melanogaster]	No	0.913885	0	0.005587	-0.005587	0.05164	0.1082	576	0.936354
calmodulin, isoform E [Drosophila melanogaster]	No	0.764639	0	0.01547	-0.01547	0.05164	0.2995	576	0.936354
ribosomal protein L26, isoform C [Drosophila melanogaster]	No	0.195736	0	0.06689	-0.06689	0.05164	1.295	576	0.879736
ribosomal protein L32, isoform C [Drosophila melanogaster]	No	0.732031	0	0.01769	-0.01769	0.05164	0.3426	576	0.936354
uncharacterized protein Dmel_CG31368, isoform C [Drosophila melanogaster]	No	0.971245	0	0.001862	-0.001862	0.05164	0.03606	576	0.936354
CG8370, isoform B [Drosophila melanogaster]	No	>0.999999	0	0	0	0.05164	0	576	0.936354
CCHC-type zinc finger nucleic acid binding protein, isoform B [Drosophila melanogaster]	No	>0.999999	0	0	0	0.05164	0	576	0.936354
ribosomal protein L35A [Drosophila melanogaster]	No	0.287848	0	0.05493	-0.05493	0.05164	1.064	576	0.936354
listerin E3 ubiquitin protein ligase 1 [Drosophila melanogaster]	No	0.942528	0	0.003724	-0.003724	0.05164	0.07212	576	0.936354
ATP synthase, subunit D, isoform C [Drosophila melanogaster]	No	0.928195	0	0.004655	-0.004655	0.05164	0.09016	576	0.936354
twenty-four, isoform N [Drosophila melanogaster]	No	>0.999999	0	0	0	0.05164	0	576	0.936354
ribosomal protein L18A [Drosophila melanogaster]	No	0.060159	0	0.09725	-0.09725	0.05164	1.883	576	0.348883
enhancer of polycomb, isoform C [Drosophila melanogaster]	Yes	7.1e-05	0	0.2067	-0.2067	0.05164	4.002	576	0.000912
MRG/MORF4L binding protein [Drosophila melanogaster]	No	0.871142	0	0.00838	-0.00838	0.05164	0.1623	576	0.936354
ribosomal protein L17, isoform E [Drosophila melanogaster]	No	0.553044	0	0.03065	-0.03065	0.05164	0.5936	576	0.936354
protein partner of snf, isoform B [Drosophila melanogaster]	No	0.00946	0	0.1345	-0.1345	0.05164	2.604	576	0.073946
Esa1-associated factor 6 [Drosophila melanogaster]	No	0.885354	0	0.007449	-0.007449	0.05164	0.1442	576	0.936354
ribosomal protein L13A, isoform B [Drosophila melanogaster]	No	0.368453	0	0.04648	-0.04648	0.05164	0.9001	576	0.936354
uncharacterized protein Dmel_CG15735 [Drosophila melanogaster]	No	0.956879	0	0.002793	-0.002793	0.05164	0.05409	576	0.936354
DNA polymerase epsilon 255kD subunit [Drosophila melanogaster]	No	0.885354	0	0.007449	-0.007449	0.05164	0.1442	576	0.936354
Gas41 [Drosophila melanogaster]	No	0.614878	0	0.02599	-0.02599	0.05164	0.5034	576	0.936354
megator, isoform B [Drosophila melanogaster]	No	>0.999999	0	0	0	0.05164	0	576	0.936354
alpha spectrin, isoform B [Drosophila melanogaster]	No	>0.999999	0	0	0	0.05164	0	576	0.936354
ribosomal protein L23A [Drosophila melanogaster]	No	>0.999999	0	0	0	0.05164	0	576	0.936354
ribosomal protein L23A [Drosophila melanogaster]	No	>0.999999	0	0	0	0.05164	0	576	0.936354
uncharacterized protein Dmel_CG10880, isoform B [Drosophila melanogaster]	No	0.956879	0	0.002793	-0.002793	0.05164	0.05409	576	0.936354
ATP synthase, gamma subunit, isoform C [Drosophila melanogaster]	No	0.291696	0	0.0545	-0.0545	0.05164	1.055	576	0.936354
ribosomal protein LP0, isoform B [Drosophila melanogaster]	No	0.732031	0	0.01769	-0.01769	0.05164	0.3426	576	0.936354
Cluster of domino, isoform G [Drosophila melanogaster] (NP_001286676.1)	Yes	<0.000001	0	0.6584	-0.6584	0.05164	12.75	576	<0.000001
CG6937 [Drosophila melanogaster]	No	0.450058	0	0.03903	-0.03903	0.05164	0.7558	576	0.936354
YL-1, isoform B [Drosophila melanogaster]	No	0.871142	0	0.00838	-0.00838	0.05164	0.1623	576	0.936354
lethal (1) G0156, isoform D [Drosophila melanogaster]	No	0.899603	0	0.006518	-0.006518	0.05164	0.1262	576	0.936354
mapmodulin, isoform D [Drosophila melanogaster]	Yes	<0.000001	0	0.4014	-0.4014	0.05164	7.772	576	<0.000001
Cluster of actin 42A [Drosophila melanogaster] (NP_523625.1)	No	0.427889	0	0.04097	-0.04097	0.05164	0.7934	576	0.936354
nucleosome assembly protein 1, isoform C [Drosophila melanogaster]	No	0.328618	0	0.05049	-0.05049	0.05164	0.9777	576	0.936354
Nipped-A, isoform E [Drosophila melanogaster]	Yes	1e-06	0	0.2539	-0.2539	0.05164	4.918	576	2.3e-05
Actin-related protein 6 [Drosophila melanogaster]	No	0.885354	0	0.007449	-0.007449	0.05164	0.1442	576	0.936354
Cluster of regulatory particle triple-A ATPase 6 [Drosophila melanogaster] (NP_608447.1)	No	>0.999999	0	0	0	0.05164	0	576	0.936354
uncharacterized protein Dmel_CG12262 [Drosophila melanogaster]	No	>0.999999	0	0	0	0.05164	0	576	0.936354
brahma associated protein 55kD [Drosophila melanogaster]	No	0.002628	0	0.156	-0.156	0.05164	3.021	576	0.023628
ribosomal protein L3, isoform H [Drosophila melanogaster]	No	0.002797	0	0.155	-0.155	0.05164	3.002	576	0.023947
MORF-related gene 15, isoform B [Drosophila melanogaster]	No	0.312913	0	0.05216	-0.05216	0.05164	1.01	576	0.936354
DNA methyltransferase 1 associated protein 1 [Drosophila melanogaster]	No	0.0017	0	0.1628	-0.1628	0.05164	3.153	576	0.0191
eukaryotic translation elongation factor 1 alpha 1, isoform E [Drosophila melanogaster]	No	>0.999999	0	0	0	0.05164	0	576	0.936354
pontin [Drosophila melanogaster]	No	0.004017	0	0.1492	-0.1492	0.05164	2.888	576	0.032829
elongation factor 1alpha100E, isoform C [Drosophila melanogaster]	No	0.011581	0	0.1308	-0.1308	0.05164	2.533	576	0.083281
Int6 [Drosophila melanogaster]	No	0.971245	0	0.001862	-0.001862	0.05164	0.03606	576	0.936354
thiolase [Drosophila melanogaster]	No	0.971245	0	0.001862	-0.001862	0.05164	0.03606	576	0.936354
Sec61 alpha subunit, isoform B [Drosophila melanogaster]	No	0.956879	0	0.002793	-0.002793	0.05164	0.05409	576	0.936354
LDL receptor protein 1, isoform F [Drosophila melanogaster]	No	0.677228	0	0.02151	-0.02151	0.05164	0.4165	576	0.936354
reptin, isoform C [Drosophila melanogaster]	Yes	<0.000001	0	0.2694	-0.2694	0.05164	5.216	576	6e-06
ATP synthase, beta subunit, isoform C [Drosophila melanogaster]	No	0.37638	0	0.04571	-0.04571	0.05164	0.8853	576	0.936354
histone deacetylase 1 [Drosophila melanogaster]	Yes	5e-06	0	0.2387	-0.2387	0.05164	4.623	576	7.6e-05
pendulin [Drosophila melanogaster]	No	0.971245	0	0.001862	-0.001862	0.05164	0.03606	576	0.936354
T-cp1zeta [Drosophila melanogaster]	No	>0.999999	0	0	0	0.05164	0	576	0.936354
cctgamma, isoform D [Drosophila melanogaster]	No	>0.999999	0	0	0	0.05164	0	576	0.936354
CG8258 [Drosophila melanogaster]	No	>0.999999	0	0	0	0.05164	0	576	0.936354
purity of essence, isoform B [Drosophila melanogaster]	No	>0.999999	0	0	0	0.05164	0	576	0.936354
Cluster of heat shock protein 60A, isoform B [Drosophila melanogaster] (NP_727489.1)	No	>0.999999	0	0	0	0.05164	0	576	0.936354
CG1620, isoform C [Drosophila melanogaster]	No	0.052616	0	0.1003	-0.1003	0.05164	1.942	576	0.315308
Cluster of CG1620, isoform C [Drosophila melanogaster] (NP_001260777.1)	No	0.552059	0	0.03073	-0.03073	0.05164	0.595	576	0.936354
stunted, isoform A [Drosophila melanogaster]	No	0.942528	0	0.003724	-0.003724	0.05164	0.07212	576	0.936354
uncharacterized protein Dmel_CG13364 [Drosophila melanogaster]	No	0.871142	0	0.00838	-0.00838	0.05164	0.1623	576	0.936354
transferrin 1, isoform C [Drosophila melanogaster]	No	>0.999999	0	0	0	0.05164	0	576	0.936354
heat shock protein cognate 5, isoform B [Drosophila melanogaster]	No	>0.999999	0	0	0	0.05164	0	576	0.936354
apoptosis inducing factor, isoform C [Drosophila melanogaster]	No	0.928195	0	0.004655	-0.004655	0.05164	0.09016	576	0.936354
mitochondrial trifunctional protein alpha subunit, isoform A [Drosophila melanogaster]	No	0.750929	0	0.0164	-0.0164	0.05164	0.3176	576	0.936354
belle, isoform B [Drosophila melanogaster]	No	>0.999999	0	0	0	0.05164	0	576	0.936354
ATP synthase, subunit E, isoform C [Drosophila melanogaster]	No	0.942528	0	0.003724	-0.003724	0.05164	0.07212	576	0.936354
bromodomain containing 8 [Drosophila melanogaster]	No	0.143108	0	0.07572	-0.07572	0.05164	1.466	576	0.714663
elongation factor 2, isoform C [Drosophila melanogaster]	No	0.038541	0	0.1071	-0.1071	0.05164	2.074	576	0.238927
aluminum tubes, isoform H [Drosophila melanogaster]	No	0.541055	0	0.03158	-0.03158	0.05164	0.6116	576	0.936354
uncharacterized protein Dmel_CG30497, isoform A [Drosophila melanogaster]	No	0.971245	0	0.001862	-0.001862	0.05164	0.03606	576	0.936354

## Sheet: Plotted WT v deltaSAM
Figure 1-Source Data 3
Values plotted in Figure 1-Supplement 2A.
	Difference (WT-deltaSAM)	negative log (p-value)
Cluster of giant nuclei [Drosophila melanogaster] (NP_648726.1)	0	1.4427e-06
Cluster of ribosomal protein S27A [Drosophila melanogaster] (NP_476778.1)	-0.05363	2.75038
ribosomal protein S27A [Drosophila melanogaster]	-0.04014	1.83937
ribosomal protein L40, isoform B [Drosophila melanogaster]	-0.03036	1.27522
Ubiquitin-63E, isoform D [Drosophila melanogaster]	0	1.4427e-06
ribosomal protein S3, isoform B [Drosophila melanogaster]
ribosomal protein S25, isoform B [Drosophila melanogaster]
Cluster of twins, isoform I [Drosophila melanogaster] (NP_001287269.1)	-0.2326	19.9316
uncharacterized protein Dmel_CG33308 [Drosophila melanogaster]	0.008915	0.303896
ribosomal protein L38, isoform B [Drosophila melanogaster]	-0.02355	0.927982
uncharacterized protein Dmel_CG34447, isoform B [Drosophila melanogaster]	0	1.4427e-06
CG5665, isoform C [Drosophila melanogaster]	0	1.4427e-06
CG5162, isoform B [Drosophila melanogaster]	0	1.4427e-06
ribosomal protein L22 [Drosophila melanogaster]	-0.01275	0.451871
ribosomal protein L29, isoform D [Drosophila melanogaster]
twenty-four, isoform N [Drosophila melanogaster]	0.02466	0.982283
Cluster of bicaudal C, isoform B [Drosophila melanogaster] (NP_723948.1)	0.2902	19.9316
eukaryotic translation initiation factor 4G, isoform B [Drosophila melanogaster]	-0.01199	0.421776
Cluster of ypsilon schachtel, isoform B [Drosophila melanogaster] (NP_001246730.1)	0.008456	0.28692
Cluster of protein phosphatase 2A at 29B, isoform A [Drosophila melanogaster] (NP_001027227.1)	-0.1165	9.13472
ribosomal protein L24, isoform C [Drosophila melanogaster]	-0.009152	0.312737
ribosomal protein L7A, isoform F [Drosophila melanogaster]	-0.03691	1.64428
CG3800, isoform B [Drosophila melanogaster]	-0.03083	1.30027
Cluster of alpha-Tubulin at 84B [Drosophila melanogaster] (NP_476772.1)	0.008707	0.296201
alpha-Tubulin at 85E [Drosophila melanogaster]	0.005372	0.176526
ribosomal protein S8, isoform G [Drosophila melanogaster]	-0.02928	1.21746
fibrillarin [Drosophila melanogaster]
ribosomal protein S14b, isoform B [Drosophila melanogaster]	0.032	1.36436
ribosomal protein S27, isoform B [Drosophila melanogaster]	0.0113	0.394843
Cluster of heat shock protein 68 [Drosophila melanogaster] (NP_524474.1)
ribosomal protein S3A, isoform F [Drosophila melanogaster]	0.0001225	0.00380652
ribosomal protein S7, isoform E [Drosophila melanogaster]	0.01209	0.425736
ribosomal protein S19a, isoform E [Drosophila melanogaster]	-0.007328	0.24574
heat shock protein 27, isoform B [Drosophila melanogaster]	-0.0426	1.99415
ribosomal protein S18, isoform B [Drosophila melanogaster]	-0.01372	0.490971
ribosomal protein S23, isoform B [Drosophila melanogaster]	-0.01516	0.550412
ribosomal protein L8, isoform B [Drosophila melanogaster]	-0.03665	1.62896
microtubule star, isoform C [Drosophila melanogaster]	-0.1304	11.0247
alpha-Tubulin at 67C [Drosophila melanogaster]	-0.001634	0.0516025
ribosomal protein L4 [Drosophila melanogaster]	-0.01022	0.353107
Ataxin-2, isoform B [Drosophila melanogaster]	-0.03046	1.28051
Cluster of ribosomal protein S11, isoform C [Drosophila melanogaster] (NP_725114.1)	0.005718	0.188554
ribosomal protein S11, isoform C [Drosophila melanogaster]	0.005718	0.188554
ribosomal protein S11, isoform B [Drosophila melanogaster]	0.006198	0.205427
ribosomal protein L10, isoform E [Drosophila melanogaster]	-0.000924	0.0289638
Cluster of glyceraldehyde 3 phosphate dehydrogenase 2, isoform C [Drosophila melanogaster] (NP_001259584.1)	-0.006572	0.218664
glyceraldehyde 3 phosphate dehydrogenase 2, isoform C [Drosophila melanogaster]	-0.006572	0.218664
glyceraldehyde 3 phosphate dehydrogenase 1, isoform B [Drosophila melanogaster]	-0.00558	0.183731
heat shock protein cognate 2 [Drosophila melanogaster]	-0.00786	0.265046
ribosomal protein L27A, isoform D [Drosophila melanogaster]	0.001557	0.0491315
pyruvate kinase, isoform A [Drosophila melanogaster]	0.001137	0.0357108
ribosomal protein S16, isoform B [Drosophila melanogaster]	0.02525	1.01116
ribosomal protein L23A [Drosophila melanogaster]	-0.01921	0.726097
heat shock protein 83, isoform B [Drosophila melanogaster]	-0.01392	0.499337
ribosomal protein S6, isoform B [Drosophila melanogaster]	0.001382	0.0435225
ribosomal protein L28, isoform G [Drosophila melanogaster]	-0.0111	0.387149
ribosomal protein L10Ab, isoform A [Drosophila melanogaster]	-0.002923	0.0935927
heat shock protein 26, isoform B [Drosophila melanogaster]	-0.03116	1.31805
CG2233 [Drosophila melanogaster]	0.002793	0.0893195
glycogen synthase, isoform A [Drosophila melanogaster]	-0.01292	0.458852
ribosomal protein S20 [Drosophila melanogaster]	-0.02477	0.98778
14-3-3zeta, isoform F [Drosophila melanogaster]	-0.0007787	0.0243713
ribosomal protein L18, isoform C [Drosophila melanogaster]	-0.005907	0.195185
ribosomal protein L7, isoform B [Drosophila melanogaster]	-0.01594	0.583569
bellwether [Drosophila melanogaster]	0.003312	0.106498
Cluster of histone H4 [Drosophila melanogaster] (NP_001027382.1)	-0.01672	0.616811
histone H4 [Drosophila melanogaster]	-0.01672	0.616811
histone H4 replacement, isoform D [Drosophila melanogaster]	-0.01672	0.616811
Cluster of ribosomal protein L34b, isoform D [Drosophila melanogaster] (NP_001287250.1)	-0.01593	0.582905
ribosomal protein L34b, isoform D [Drosophila melanogaster]	-0.01264	0.44754
ribosomal protein L34a, isoform C [Drosophila melanogaster]	-0.01036	0.358622
tropomyosin 2, isoform G [Drosophila melanogaster]	-0.002739	0.0875371
ribosomal protein L6, isoform B [Drosophila melanogaster]	-0.01641	0.603354
rasputin, isoform G [Drosophila melanogaster]	-0.01402	0.503456
ribosomal protein L13, isoform C [Drosophila melanogaster]	0.001839	0.0582236
Cluster of papilin, isoform E [Drosophila melanogaster] (NP_788752.2)	0	1.4427e-06
papilin, isoform E [Drosophila melanogaster]	0	1.4427e-06
papilin, isoform G [Drosophila melanogaster]	0	1.4427e-06
ribosomal protein L14 [Drosophila melanogaster]	-0.002427	0.0772967
ribosomal protein L37A, isoform C [Drosophila melanogaster]	-0.0142	0.510626
ribosomal protein S9, isoform E [Drosophila melanogaster]	-0.007358	0.246818
Ran, isoform D [Drosophila melanogaster]	-0.0004891	0.015259
Chain C, Porcine E-Trypsin
ribosomal protein S17 [Drosophila melanogaster]	-0.01112	0.387759
ribosomal protein S29, isoform B [Drosophila melanogaster]	0.000519	0.0161968
megalin, isoform E [Drosophila melanogaster]	0	1.4427e-06
Cluster of heat shock protein 60A, isoform B [Drosophila melanogaster] (NP_727489.1)	-0.003289	0.10574
heat shock protein 60A, isoform B [Drosophila melanogaster]	-0.003289	0.10574
heat shock protein 60C, isoform B [Drosophila melanogaster]	0	1.4427e-06
ribosomal protein L19, isoform B [Drosophila melanogaster]	-0.01135	0.396679
Cluster of Rab35, isoform D [Drosophila melanogaster] (NP_001259739.1)	-0.001778	0.0562482
Rab35, isoform D [Drosophila melanogaster]	-0.001778	0.0562482
Rab10 [Drosophila melanogaster]	-0.001778	0.0562482
Rab1 [Drosophila melanogaster]	-0.001778	0.0562482
Rab8, isoform C [Drosophila melanogaster]	0.002809	0.0898369
Rab26, isoform E [Drosophila melanogaster]	0	1.4427e-06
Rab14, isoform B [Drosophila melanogaster]	0	1.4427e-06
Rab26, isoform G [Drosophila melanogaster]	0	1.4427e-06
Rab4, isoform A [Drosophila melanogaster]	0	1.4427e-06
Rab3 [Drosophila melanogaster]	0	1.4427e-06
belphegor, isoform B [Drosophila melanogaster]	0.03157	1.34043
ribosomal protein L26, isoform C [Drosophila melanogaster]	0.005122	0.167852
ribosomal protein L12, isoform C [Drosophila melanogaster]	-0.01242	0.438745
ribosomal protein L27, isoform D [Drosophila melanogaster]	-0.0004734	0.0147677
ribosomal protein L18A [Drosophila melanogaster]	0.005106	0.167309
abnormal spindle [Drosophila melanogaster]	-0.003747	0.121038
Cluster of tropomyosin 1, isoform O [Drosophila melanogaster] (NP_732001.3)	-0.005068	0.165981
tropomyosin 1, isoform O [Drosophila melanogaster]	-0.005068	0.165981
tropomyosin 1, isoform E [Drosophila melanogaster]	-0.001778	0.0562482
tropomyosin 1, isoform H [Drosophila melanogaster]	0.002809	0.0898369
tropomyosin 1, isoform R [Drosophila melanogaster]	0	1.4427e-06
ribosomal protein S10b, isoform E [Drosophila melanogaster]	-0.00558	0.183731
ribosomal protein L3, isoform H [Drosophila melanogaster]	-0.0009924	0.0311292
14-3-3epsilon, isoform A [Drosophila melanogaster]	-0.003572	0.115166
ubiquitin activating enzyme 5 [Drosophila melanogaster]	-0.002481	0.0790665
ribosomal protein L15, isoform I [Drosophila melanogaster]	-0.0009924	0.0311292
eukaryotic initiation factor 4E, isoform I [Drosophila melanogaster]	0.002625	0.0837955
ribosomal protein S5b, isoform A [Drosophila melanogaster]	-0.00835	0.283
ribosomal protein S13, isoform C [Drosophila melanogaster]	0.004296	0.139571
ribosomal protein L23 [Drosophila melanogaster]	-0.006069	0.200861
CG5726 [Drosophila melanogaster]	-0.009556	0.327919
Tcp1-like, isoform B [Drosophila melanogaster]	0.0219	0.849438
ribosomal protein L36A, isoform B [Drosophila melanogaster]	-0.01344	0.47978
Cluster of G protein alpha s subunit, isoform D [Drosophila melanogaster] (NP_001163283.1)	0	1.4427e-06
G protein alpha s subunit, isoform D [Drosophila melanogaster]
G protein alpha o subunit, isoform H [Drosophila melanogaster]
G protein alpha i subunit [Drosophila melanogaster]
Cluster of ribosomal protein L13A, isoform B [Drosophila melanogaster] (NP_649560.1)	-0.003289	0.10574
ribosomal protein L13A, isoform B [Drosophila melanogaster]
ribosomal protein L13A, isoform C [Drosophila melanogaster]
zipper, isoform D [Drosophila melanogaster]	-0.02857	1.18051
ribosomal protein S26, isoform E [Drosophila melanogaster]	-0.0007717	0.0241483
Cluster of Fmr1, isoform G [Drosophila melanogaster] (NP_001247017.1)	-0.006267	0.207841
Fmr1, isoform G [Drosophila melanogaster]	-0.006267	0.207841
Fmr1, isoform H [Drosophila melanogaster]	-0.008067	0.272627
CG4586 [Drosophila melanogaster]	0.01301	0.462511
ribosomal protein S2, isoform C [Drosophila melanogaster]	0.003106	0.0996382
Rab11, isoform A [Drosophila melanogaster]	0	1.4427e-06
ribosomal protein L30, isoform E [Drosophila melanogaster]	-0.00835	0.283
histone H2B [Drosophila melanogaster]	-0.001275	0.0401127
ribosomal protein L32, isoform C [Drosophila melanogaster]	-0.008067	0.272627
chorion protein 36 [Drosophila melanogaster]
yellow-g [Drosophila melanogaster]
uncharacterized protein Dmel_CG17018, isoform C [Drosophila melanogaster]	-0.005525	0.181845
ribosomal protein S4, isoform C [Drosophila melanogaster]	-0.01065	0.369464
ribosomal protein L11, isoform B [Drosophila melanogaster]	-0.007068	0.23639
casein kappa [Bos taurus]	-0.01117	0.389527
rudimentary, isoform E [Drosophila melanogaster]	-0.006076	0.20111
heterogeneous nuclear ribonucleoprotein at 27C, isoform H [Drosophila melanogaster]	0.01099	0.382673
Cluster of eukaryotic initiation factor 4a, isoform F [Drosophila melanogaster] (NP_001260117.1)	-0.006877	0.229551
eukaryotic initiation factor 4a, isoform F [Drosophila melanogaster]	-0.00229	0.0728363
eIF4AIII [Drosophila melanogaster]	-0.005083	0.166524
Cluster of Glutamyl-prolyl-tRNA synthetase, isoform A [Drosophila melanogaster] (NP_524471.2)	0.00838	0.2841
Glutamyl-prolyl-tRNA synthetase, isoform A [Drosophila melanogaster]	0.00838	0.2841
Glutamyl-prolyl-tRNA synthetase, isoform B [Drosophila melanogaster]	0.005587	0.183977
Cluster of sterol carrier protein X-related thiolase [Drosophila melanogaster] (NP_524715.2)	-0.02229	0.868116
sterol carrier protein X-related thiolase [Drosophila melanogaster]	-0.02229	0.868116
uncharacterized protein Dmel_CG17597, isoform B [Drosophila melanogaster]	0	1.4427e-06
IGF-II mRNA-binding protein, isoform K [Drosophila melanogaster]	0.004114	0.133394
uncharacterized protein Dmel_CG17754, isoform G [Drosophila melanogaster]	0.002793	0.0893195
malic enzyme, isoform B [Drosophila melanogaster]	-0.03999	1.82993
uncharacterized protein Dmel_CG12262 [Drosophila melanogaster]	-0.01694	0.626315
lost [Drosophila melanogaster]	-0.01365	0.488455
ribosomal protein L21, isoform C [Drosophila melanogaster]	0.00509	0.166768
Cluster of wing blister, isoform G [Drosophila melanogaster] (NP_476790.3-DECOY)	0	1.4427e-06
wing blister, isoform G [Drosophila melanogaster]	0	1.4427e-06
wing blister, isoform F [Drosophila melanogaster]	0	1.4427e-06
GTPase activating protein and centrosome-associated, isoform B [Drosophila melanogaster]	0.01678	0.619073
alpha spectrin, isoform B [Drosophila melanogaster]	-0.009868	0.339725
ribosomal protein L17, isoform E [Drosophila melanogaster]	-0.01426	0.513144
ribosomal protein S5a, isoform D [Drosophila melanogaster]	7.08e-06	0.000219306
Cluster of adenosylhomocysteinase like 1 [Drosophila melanogaster] (NP_647746.1)	0	1.4427e-06
adenosylhomocysteinase like 1 [Drosophila melanogaster]	0	1.4427e-06
adenosylhomocysteinase like 2, isoform D [Drosophila melanogaster]	0	1.4427e-06
TER94, isoform E [Drosophila melanogaster]	0	1.4427e-06
mitochondrial trifunctional protein alpha subunit, isoform A [Drosophila melanogaster]	-0.00606	0.200558
glycoprotein 93 [Drosophila melanogaster]	0	1.4427e-06
Cluster of lipophorin receptor 1, isoform K [Drosophila melanogaster] (NP_001097934.2)	-0.009174	0.313588
lipophorin receptor 1, isoform K [Drosophila melanogaster]	-0.009174	0.313588
lipophorin receptor 1, isoform S [Drosophila melanogaster]	0	1.4427e-06
heat shock protein cognate 5, isoform B [Drosophila melanogaster]	-0.01316	0.468362
non-claret disjunctional, isoform B [Drosophila melanogaster]	-0.002481	0.0790665
regulatory particle triple-A ATPase 6 [Drosophila melanogaster]	0.002297	0.0730669
ribosomal protein L9, isoform C [Drosophila melanogaster]	0.01119	0.390411
Rab7, isoform C [Drosophila melanogaster]	0	1.4427e-06
chorion protein b at 7F, isoform A [Drosophila melanogaster]	-0.009174	0.313588
Gamma-interferon-inducible lysosomal thiol reductase 1 [Drosophila melanogaster]	-0.01145	0.400534
lethal (1) G0156, isoform C [Drosophila melanogaster]	-0.004282	0.13909
Lon protease, isoform C [Drosophila melanogaster]	0.01397	0.5012
clathrin heavy chain, isoform G [Drosophila melanogaster]	0	1.4427e-06
deadhead, isoform B [Drosophila melanogaster]	-0.02212	0.85985
spindle assembly abnormal 4 [Drosophila melanogaster]	0.01397	0.5012
Cluster of G protein alpha q subunit, isoform D [Drosophila melanogaster] (NP_725196.1)	0	1.4427e-06
G protein alpha q subunit, isoform D [Drosophila melanogaster]	0	1.4427e-06
uncharacterized protein Dmel_CG30054, isoform E [Drosophila melanogaster]	0	1.4427e-06
uncharacterized protein Dmel_CG30054, isoform F [Drosophila melanogaster]	0	1.4427e-06
chorion protein a at 7F [Drosophila melanogaster]
uncharacterized protein Dmel_CG15293, isoform C [Drosophila melanogaster]	0.002793	0.0893195
belle, isoform B [Drosophila melanogaster]	0	1.4427e-06
beta spectrin, isoform A [Drosophila melanogaster]	0	1.4427e-06
ribosomal protein L35A [Drosophila melanogaster]	-0.0004962	0.0154821
yellow-g2 [Drosophila melanogaster]
ribosomal protein L36, isoform E [Drosophila melanogaster]	-0.003289	0.10574
succinate dehydrogenase, subunit A (flavoprotein), isoform C [Drosophila melanogaster]	0	1.4427e-06
chorion protein 18 [Drosophila melanogaster]
uncharacterized protein Dmel_CG30069 [Drosophila melanogaster]	-0.01246	0.440557
Rab5, isoform I [Drosophila melanogaster]	-0.001778	0.0562482
IGH1M_MOUSE RecName: Full=Ig gamma-1 chain C region, membrane-bound form	-0.0004962	0.0154821
La related protein, isoform H [Drosophila melanogaster]	0.01117	0.389803
swallow [Drosophila melanogaster]	0.0005503	0.017182
wispy, isoform B [Drosophila melanogaster]	0.005106	0.167309
ribosomal protein L31, isoform C [Drosophila melanogaster]	0.003808	0.123096
argonaute 2, isoform B [Drosophila melanogaster]	0.005122	0.167852
Isoleucyl-tRNA synthetase, isoform D [Drosophila melanogaster]	0.01398	0.501841
Rap1 GTPase, isoform C [Drosophila melanogaster]	0	1.4427e-06
CG8507 [Drosophila melanogaster]	-0.004282	0.13909
transforming acidic coiled-coil protein, isoform N [Drosophila melanogaster]	0.001031	0.0323489
ribosomal protein S24 [Drosophila melanogaster]	-0.002786	0.0890862
gamma-Tubulin at 37C, isoform B [Drosophila melanogaster]	-0.00229	0.0728363
female-specific independent of transformer [Drosophila melanogaster]	-0.0004962	0.0154821
T-cp1zeta [Drosophila melanogaster]	0.002793	0.0893195
CG8036, isoform D [Drosophila melanogaster]	-0.003289	0.10574
peroxin 14 [Drosophila melanogaster]	-0.00558	0.183731
regulatory particle triple-A ATPase 1 [Drosophila melanogaster]	0	1.4427e-06
uncharacterized protein Dmel_CG13084 [Drosophila melanogaster]	-0.01835	0.68769
bonus, isoform B [Drosophila melanogaster]	-0.008373	0.283838
uncharacterized protein Dmel_CG15735 [Drosophila melanogaster]	-0.0009767	0.030631
uncharacterized protein Dmel_CG13364 [Drosophila melanogaster]	0	1.4427e-06
Lysyl-tRNA synthetase, isoform C [Drosophila melanogaster]	0.002297	0.0730669
Grip71 [Drosophila melanogaster]	-0.0009924	0.0311292
elongation factor 1 beta, isoform C [Drosophila melanogaster]	0	1.4427e-06
Aspartyl-tRNA synthetase, isoform B [Drosophila melanogaster]	0.005587	0.183977
roadkill, isoform C [Drosophila melanogaster]	0.001817	0.0574892
ADP ribosylation factor at 102F, isoform B [Drosophila melanogaster]	0.002809	0.0898369

## Sheet: Plotted WT v 9A
Figure 1-Source Data 3
Values plotted in Figure 1-Supplement 2B.
	Difference (WT-9A)	negative log(p-value)
Cluster of giant nuclei [Drosophila melanogaster] (NP_648726.1)	0	1.4427e-06
giant nuclei [Drosophila melanogaster]
GNU_9A protein[Drosophila melanogaster]
Cluster of ribosomal protein S27A [Drosophila melanogaster] (NP_476778.1)	-0.1917	9.87358
ribosomal protein S27A [Drosophila melanogaster]	-0.1224	4.78552
ribosomal protein L40, isoform B [Drosophila melanogaster]	-0.1665	7.81685
Ubiquitin-63E, isoform D [Drosophila melanogaster]	0	1.4427e-06
Cluster of heat shock protein cognate 4, isoform G [Drosophila melanogaster] (NP_001262586.1)	-0.1777	8.70275
heat shock protein cognate 4, isoform G [Drosophila melanogaster]	-0.1778	8.70757
heat shock protein cognate 1, isoform A [Drosophila melanogaster]	-0.03453	0.85218
Cluster of actin 5C, isoform E [Drosophila melanogaster] (NP_001284915.1)
actin 5C, isoform E [Drosophila melanogaster]
actin 57B [Drosophila melanogaster]
actin 88F [Drosophila melanogaster]
actin 79B, isoform B [Drosophila melanogaster]
Actin-related protein 53D [Drosophila melanogaster]	-0.005556	0.113823
ENO1_YEAST Enolase 1 - Saccharomyces cerevisiae (Baker's yeast).
ribosomal protein S3, isoform B [Drosophila melanogaster]	-0.2	10.6029
heat shock 70-kDa protein cognate 3, isoform E [Drosophila melanogaster]	-0.02531	0.589878
ribosomal protein S25, isoform B [Drosophila melanogaster]	-0.1831	9.14857
Cluster of twins, isoform I [Drosophila melanogaster] (NP_001287269.1)	0.06015	1.72374
twins, isoform I [Drosophila melanogaster]	0.06015	1.72374
twins, isoform H [Drosophila melanogaster]	0.05175	1.41425
uncharacterized protein Dmel_CG33308 [Drosophila melanogaster]	0.01679	0.370529
Cluster of beta-Tubulin at 56D, isoform B [Drosophila melanogaster] (NP_523795.2)	-0.07609	2.37758
beta-Tubulin at 56D, isoform B [Drosophila melanogaster]	-0.09006	3.0232
beta-Tubulin at 85D [Drosophila melanogaster]	-0.02069	0.468246
beta-Tubulin at 60D, isoform A [Drosophila melanogaster]	-0.02966	0.710206
beta-Tubulin at 97EF, isoform B [Drosophila melanogaster]	0	1.4427e-06
yolk protein 2, isoform B [Drosophila melanogaster]
ribosomal protein L38, isoform B [Drosophila melanogaster]	-0.08298	2.68727
Cluster of yolk protein 3, isoform B [Drosophila melanogaster] (NP_001285228.1)	-0.08885	2.96494
yolk protein 3, isoform B [Drosophila melanogaster]	-0.08885	2.96494
uncharacterized protein Dmel_CG34447, isoform B [Drosophila melanogaster]	0	1.4427e-06
CG5665, isoform C [Drosophila melanogaster]	0	1.4427e-06
CG5162, isoform B [Drosophila melanogaster]	0	1.4427e-06
yolk protein 1, isoform B [Drosophila melanogaster]	-0.1387	5.82394
ribosomal protein L22 [Drosophila melanogaster]	-0.2594	16.6096
poly(A) binding protein, isoform C [Drosophila melanogaster]	0.09317	3.17669
Cluster of defective chorion 1, isoform G [Drosophila melanogaster] (NP_001245569.1)
defective chorion 1, isoform G [Drosophila melanogaster]
defective chorion 1, isoform E [Drosophila melanogaster]
ribosomal protein L29, isoform D [Drosophila melanogaster]	-0.1802	8.90505
twenty-four, isoform N [Drosophila melanogaster]	0.1456	6.29234
Cluster of bicaudal C, isoform B [Drosophila melanogaster] (NP_723948.1)	0.2657	17.3466
bicaudal C, isoform B [Drosophila melanogaster]
bicaudal C, isoform D [Drosophila melanogaster]
eukaryotic translation initiation factor 4G, isoform B [Drosophila melanogaster]	-0.01429	0.310202
Cluster of stress-sensitive B, isoform E [Drosophila melanogaster] (NP_001285090.1)	-0.03625	0.903806
stress-sensitive B, isoform E [Drosophila melanogaster]	-0.03625	0.903806
adenine nucleotide translocase 2, isoform C [Drosophila melanogaster]	-0.001157	0.0230059
Cluster of ypsilon schachtel, isoform B [Drosophila melanogaster] (NP_001246730.1)	0.0809	2.59225
ypsilon schachtel, isoform B [Drosophila melanogaster]
ypsilon schachtel, isoform A [Drosophila melanogaster]
Cluster of protein phosphatase 2A at 29B, isoform A [Drosophila melanogaster] (NP_001027227.1)	0.01752	0.388422
protein phosphatase 2A at 29B, isoform A [Drosophila melanogaster]	0.01752	0.388422
protein phosphatase 2A at 29B, isoform D [Drosophila melanogaster]	0.01473	0.320614
Cluster of elongation factor 1alpha48D, isoform E [Drosophila melanogaster] (NP_001286322.1)	-0.01666	0.367413
elongation factor 1alpha48D, isoform E [Drosophila melanogaster]	-0.01666	0.367413
elongation factor 1alpha100E, isoform C [Drosophila melanogaster]	-0.01946	0.436815
ribosomal protein L24, isoform C [Drosophila melanogaster]	-0.01227	0.262829
ribosomal protein L7A, isoform F [Drosophila melanogaster]	-0.1581	7.18044
Cluster of myosin heavy chain, isoform U [Drosophila melanogaster] (NP_001246051.1)	0.008396	0.175312
myosin heavy chain, isoform U [Drosophila melanogaster]	0.008396	0.175312
myosin heavy chain, isoform O [Drosophila melanogaster]	0.008396	0.175312
myosin heavy chain, isoform F [Drosophila melanogaster]	0.005587	0.114483
myosin heavy chain, isoform P [Drosophila melanogaster]	0.008396	0.175312
Cluster of trailer hitch, isoform C [Drosophila melanogaster] (NP_001261770.1)	0.06437	1.88859
trailer hitch, isoform C [Drosophila melanogaster]	0.06437	1.88859
trailer hitch, isoform D [Drosophila melanogaster]	0.05318	1.46545
CG3800, isoform B [Drosophila melanogaster]	-0.03427	0.84438
Cluster of alpha-Tubulin at 84B [Drosophila melanogaster] (NP_476772.1)	-0.02793	0.661609
alpha-Tubulin at 84B [Drosophila melanogaster]	-0.02793	0.661609
alpha-Tubulin at 85E [Drosophila melanogaster]	-0.02623	0.61485
ribosomal protein S8, isoform G [Drosophila melanogaster]	-0.05853	1.66237
fibrillarin [Drosophila melanogaster]	0.03798	0.957053
ribosomal protein S14b, isoform B [Drosophila melanogaster]	-0.08026	2.56301
ribosomal protein S27, isoform B [Drosophila melanogaster]	-0.05632	1.57992
Cluster of heat shock protein 68 [Drosophila melanogaster] (NP_524474.1)	-0.04009	1.0231
heat shock protein 68 [Drosophila melanogaster]	-0.001201	0.0238828
Heat-shock-protein-70Ab [Drosophila melanogaster]	0	1.4427e-06
Heat-shock-protein-70Ba [Drosophila melanogaster]	0	1.4427e-06
ribosomal protein S3A, isoform F [Drosophila melanogaster]	-0.01386	0.299942
ribosomal protein S7, isoform E [Drosophila melanogaster]	-0.03575	0.888848
ribosomal protein S19a, isoform E [Drosophila melanogaster]	-0.01739	0.385249
heat shock protein 27, isoform B [Drosophila melanogaster]	-0.1208	4.68873
ribosomal protein S18, isoform B [Drosophila melanogaster]	-0.1079	3.94786
ribosomal protein S23, isoform B [Drosophila melanogaster]	-0.0156	0.341526
maternal expression at 31B, isoform A [Drosophila melanogaster]	-0.04356	1.13498
ribosomal protein L8, isoform B [Drosophila melanogaster]	-0.1057	3.82959
microtubule star, isoform C [Drosophila melanogaster]	0.007902	0.164472
alpha-Tubulin at 67C [Drosophila melanogaster]	-0.04852	1.30134
ribosomal protein L4 [Drosophila melanogaster]	-0.06582	1.94627
Ataxin-2, isoform B [Drosophila melanogaster]	0.06161	1.78012
Cluster of ribosomal protein S11, isoform C [Drosophila melanogaster] (NP_725114.1)	-0.03239	0.788803
ribosomal protein S11, isoform C [Drosophila melanogaster]	-0.03239	0.788803
ribosomal protein S11, isoform B [Drosophila melanogaster]	-0.01112	0.236526
ribosomal protein L10, isoform E [Drosophila melanogaster]	-0.04974	1.3435
Cluster of glyceraldehyde 3 phosphate dehydrogenase 2, isoform C [Drosophila melanogaster] (NP_001259584.1)	-0.05981	1.71109
glyceraldehyde 3 phosphate dehydrogenase 2, isoform C [Drosophila melanogaster]	-0.05364	1.48193
glyceraldehyde 3 phosphate dehydrogenase 1, isoform B [Drosophila melanogaster]	-0.04194	1.08236
heat shock protein cognate 2 [Drosophila melanogaster]	-0.05071	1.37747
thioredoxin peroxidase 1, isoform E [Drosophila melanogaster]	-0.0346	0.854046
ribosomal protein L27A, isoform D [Drosophila melanogaster]	-0.02234	0.510989
pyruvate kinase, isoform A [Drosophila melanogaster]	-0.01247	0.267465
ribosomal protein S16, isoform B [Drosophila melanogaster]	-0.03514	0.870226
ribosomal protein L23A [Drosophila melanogaster]	-0.05759	1.6271
heat shock protein 83, isoform B [Drosophila melanogaster]	-0.03974	1.01196
ribosomal protein S6, isoform B [Drosophila melanogaster]	-0.06642	1.97051
cup, isoform C [Drosophila melanogaster]	0.006331	0.13038
ribosomal protein L28, isoform G [Drosophila melanogaster]	-0.04242	1.09778
ribosomal protein L10Ab, isoform A [Drosophila melanogaster]	-0.03622	0.902939
heat shock protein 26, isoform B [Drosophila melanogaster]	-0.03685	0.922257
CG2233 [Drosophila melanogaster]	0.002793	0.0561717
glycogen synthase, isoform A [Drosophila melanogaster]	-0.01069	0.226729
ribosomal protein S20 [Drosophila melanogaster]	-0.03347	0.820591
14-3-3zeta, isoform F [Drosophila melanogaster]	-0.01506	0.328634
ribosomal protein L18, isoform C [Drosophila melanogaster]	-0.05409	1.49806
ribosomal protein L7, isoform B [Drosophila melanogaster]	-0.07372	2.27478
bellwether [Drosophila melanogaster]	-0.0493	1.32855
Cluster of histone H4 [Drosophila melanogaster] (NP_001027382.1)	-0.02458	0.570222
histone H4 [Drosophila melanogaster]	-0.02458	0.570222
histone H4 replacement, isoform D [Drosophila melanogaster]	-0.02458	0.570222
Cluster of ribosomal protein L34b, isoform D [Drosophila melanogaster] (NP_001287250.1)	-0.08543	2.80176
ribosomal protein L34b, isoform D [Drosophila melanogaster]	-0.08543	2.80176
ribosomal protein L34a, isoform C [Drosophila melanogaster]	-0.03239	0.788888
tropomyosin 2, isoform G [Drosophila melanogaster]	0.008427	0.176005
ribosomal protein L6, isoform B [Drosophila melanogaster]	-0.06534	1.9271
rasputin, isoform G [Drosophila melanogaster]	0.007949	0.165489
ribosomal protein L13, isoform C [Drosophila melanogaster]	0.007856	0.163457
Cluster of papilin, isoform E [Drosophila melanogaster] (NP_788752.2)	0	1.4427e-06
papilin, isoform E [Drosophila melanogaster]	0	1.4427e-06
papilin, isoform G [Drosophila melanogaster]	0	1.4427e-06
ribosomal protein L14 [Drosophila melanogaster]	-0.02728	0.643696
ribosomal protein L37A, isoform C [Drosophila melanogaster]	0.001113	0.0221208
ribosomal protein S9, isoform E [Drosophila melanogaster]	-0.02062	0.466311
Ran, isoform D [Drosophila melanogaster]	-0.04035	1.0315
Chain C, Porcine E-Trypsin	-0.006666	0.137587
ribosomal protein S17 [Drosophila melanogaster]	-0.006635	0.136918
ribosomal protein S29, isoform B [Drosophila melanogaster]	-0.00395	0.0800589
megalin, isoform E [Drosophila melanogaster]	-0.006173	0.126995
Cluster of heat shock protein 60A, isoform B [Drosophila melanogaster] (NP_727489.1)	-0.01852	0.41324
heat shock protein 60A, isoform B [Drosophila melanogaster]	-0.01852	0.41324
heat shock protein 60C, isoform B [Drosophila melanogaster]	-0.006173	0.126995
ribosomal protein L19, isoform B [Drosophila melanogaster]	-0.07489	2.32537
Cluster of Rab35, isoform D [Drosophila melanogaster] (NP_001259739.1)	-0.008919	0.186901
Rab35, isoform D [Drosophila melanogaster]	-0.003364	0.0679071
Rab10 [Drosophila melanogaster]	0.002809	0.0564927
Rab1 [Drosophila melanogaster]	0.002809	0.0564927
Rab8, isoform C [Drosophila melanogaster]	-0.002747	0.055215
Rab26, isoform E [Drosophila melanogaster]	-0.01173	0.250378
Rab14, isoform B [Drosophila melanogaster]	-0.005556	0.113823
Rab26, isoform G [Drosophila melanogaster]	0	1.4427e-06
Rab4, isoform A [Drosophila melanogaster]	0	1.4427e-06
Rab3 [Drosophila melanogaster]	0	1.4427e-06
belphegor, isoform B [Drosophila melanogaster]	0.01016	0.214573
ribosomal protein L26, isoform C [Drosophila melanogaster]	-0.06628	1.96495
ribosomal protein L12, isoform C [Drosophila melanogaster]	-0.007869	0.163743
ribosomal protein L27, isoform D [Drosophila melanogaster]	-0.03849	0.972786
ribosomal protein L18A [Drosophila melanogaster]	-0.0558	1.56068
abnormal spindle [Drosophila melanogaster]	-0.02057	0.465114
Cluster of tropomyosin 1, isoform O [Drosophila melanogaster] (NP_732001.3)	0.002809	0.0564927
tropomyosin 1, isoform O [Drosophila melanogaster]	0.002809	0.0564927
tropomyosin 1, isoform E [Drosophila melanogaster]	0.002809	0.0564927
tropomyosin 1, isoform H [Drosophila melanogaster]	0.002809	0.0564927
tropomyosin 1, isoform R [Drosophila melanogaster]	0	1.4427e-06
ribosomal protein S10b, isoform E [Drosophila melanogaster]	-0.0191	0.427937
ribosomal protein L3, isoform H [Drosophila melanogaster]	-0.05429	1.5054
14-3-3epsilon, isoform A [Drosophila melanogaster]	-0.02958	0.708066
ubiquitin activating enzyme 5 [Drosophila melanogaster]	-0.02307	0.530045
ribosomal protein L15, isoform I [Drosophila melanogaster]	-0.06478	1.90493
eukaryotic initiation factor 4E, isoform I [Drosophila melanogaster]	0.005695	0.116798
ribosomal protein S5b, isoform A [Drosophila melanogaster]	-0.01009	0.213123
ribosomal protein S13, isoform C [Drosophila melanogaster]	-0.01225	0.262472
ribosomal protein L23 [Drosophila melanogaster]	-0.004521	0.0919834
CG5726 [Drosophila melanogaster]	0.005649	0.115804
dynein heavy chain 64C, isoform E [Drosophila melanogaster]	0	1.4427e-06
Cluster of jabba, isoform C [Drosophila melanogaster] (NP_001137703.1)	-0.01285	0.276452
jabba, isoform C [Drosophila melanogaster]	-0.01285	0.276452
jabba, isoform I [Drosophila melanogaster]	-0.01565	0.342733
Tcp1-like, isoform B [Drosophila melanogaster]	-0.01617	0.355416
ribosomal protein L36A, isoform B [Drosophila melanogaster]	-0.0005706	0.0113015
Cluster of ATP synthase, beta subunit, isoform D [Drosophila melanogaster] (NP_001284719.1)	-0.008935	0.187249
ATP synthase, beta subunit, isoform D [Drosophila melanogaster]	-0.008935	0.187249
ATP synthase, beta subunit-like [Drosophila melanogaster]	0	1.4427e-06
Cluster of G protein alpha s subunit, isoform D [Drosophila melanogaster] (NP_001163283.1)	-0.005556	0.113823
G protein alpha s subunit, isoform D [Drosophila melanogaster]	-0.005556	0.113823
G protein alpha o subunit, isoform H [Drosophila melanogaster]	-0.005556	0.113823
G protein alpha i subunit [Drosophila melanogaster]	-0.005556	0.113823
concertina, isoform B [Drosophila melanogaster]	0	1.4427e-06
elongation factor 2, isoform C [Drosophila melanogaster]	-0.02127	0.482974
megator, isoform B [Drosophila melanogaster]	0.0112	0.238369
Cluster of ribosomal protein L13A, isoform B [Drosophila melanogaster] (NP_649560.1)	-0.03519	0.871709
ribosomal protein L13A, isoform B [Drosophila melanogaster]	-0.03519	0.871709
ribosomal protein L13A, isoform C [Drosophila melanogaster]	-0.01173	0.250378
zipper, isoform D [Drosophila melanogaster]	0.005618	0.11515
ribosomal protein S26, isoform E [Drosophila melanogaster]	0.0134	0.289131
Cluster of Fmr1, isoform G [Drosophila melanogaster] (NP_001247017.1)	0.005649	0.115804
Fmr1, isoform G [Drosophila melanogaster]	0.005649	0.115804
Fmr1, isoform H [Drosophila melanogaster]	-0.002731	0.0549003
CG4586 [Drosophila melanogaster]	0.0252	0.586887
cysteine proteinase-1, isoform C [Drosophila melanogaster]	-0.004552	0.092634
ribosomal protein S2, isoform C [Drosophila melanogaster]	-0.003904	0.0790939
Rab11, isoform A [Drosophila melanogaster]	-0.005556	0.113823
ribosomal protein L30, isoform E [Drosophila melanogaster]	-0.02676	0.629264
histone H2B [Drosophila melanogaster]	-0.01844	0.411297
ribosomal protein L32, isoform C [Drosophila melanogaster]	-0.02125	0.482579
chorion protein 36 [Drosophila melanogaster]	-0.02403	0.55539
yellow-g [Drosophila melanogaster]	0	1.4427e-06
uncharacterized protein Dmel_CG17018, isoform C [Drosophila melanogaster]	0.01681	0.370913
ribosomal protein S4, isoform C [Drosophila melanogaster]	-0.009506	0.199963
ribosomal protein L11, isoform B [Drosophila melanogaster]	-0.01566	0.343112
casein kappa [Bos taurus]	-0.0179	0.397876
rudimentary, isoform E [Drosophila melanogaster]	0.00838	0.174965
heterogeneous nuclear ribonucleoprotein at 27C, isoform H [Drosophila melanogaster]	0.02517	0.58604
DnaJ-like-2, isoform E [Drosophila melanogaster]	-0.02742	0.647571
Cluster of eukaryotic initiation factor 4a, isoform F [Drosophila melanogaster] (NP_001260117.1)	-0.02404	0.555808
eukaryotic initiation factor 4a, isoform F [Drosophila melanogaster]	-0.02404	0.555808
eIF4AIII [Drosophila melanogaster]	-0.01511	0.329754
Cluster of Glutamyl-prolyl-tRNA synthetase, isoform A [Drosophila melanogaster] (NP_524471.2)	0.00838	0.174965
Glutamyl-prolyl-tRNA synthetase, isoform A [Drosophila melanogaster]	0.00838	0.174965
Glutamyl-prolyl-tRNA synthetase, isoform B [Drosophila melanogaster]	0.005587	0.114483
Cluster of sterol carrier protein X-related thiolase [Drosophila melanogaster] (NP_524715.2)	0.005649	0.11581
sterol carrier protein X-related thiolase [Drosophila melanogaster]	0.005649	0.11581
uncharacterized protein Dmel_CG17597, isoform B [Drosophila melanogaster]	0	1.4427e-06
IGF-II mRNA-binding protein, isoform K [Drosophila melanogaster]	0.008427	0.175996
uncharacterized protein Dmel_CG17754, isoform G [Drosophila melanogaster]	-0.00338	0.0682307
malic enzyme, isoform B [Drosophila melanogaster]	-0.01235	0.26463
uncharacterized protein Dmel_CG12262 [Drosophila melanogaster]	-0.02128	0.48338
lost [Drosophila melanogaster]	-0.002762	0.0555358
ribosomal protein L21, isoform C [Drosophila melanogaster]	-0.01446	0.31427
Cluster of wing blister, isoform G [Drosophila melanogaster] (NP_476790.3-DECOY)	0	1.4427e-06
wing blister, isoform G [Drosophila melanogaster]	0	1.4427e-06
wing blister, isoform F [Drosophila melanogaster]	0	1.4427e-06
GTPase activating protein and centrosome-associated, isoform B [Drosophila melanogaster]	-0.006681	0.137926
alpha spectrin, isoform B [Drosophila melanogaster]	0	1.4427e-06
ribosomal protein L17, isoform E [Drosophila melanogaster]	-0.02622	0.614492
ribosomal protein S5a, isoform D [Drosophila melanogaster]	-0.001172	0.0233196
Cluster of adenosylhomocysteinase like 1 [Drosophila melanogaster] (NP_647746.1)	-0.04506	1.18447
adenosylhomocysteinase like 1 [Drosophila melanogaster]	-0.04506	1.18447
adenosylhomocysteinase like 2, isoform D [Drosophila melanogaster]	-0.005556	0.113823
TER94, isoform E [Drosophila melanogaster]	0	1.4427e-06
mitochondrial trifunctional protein alpha subunit, isoform A [Drosophila melanogaster]	-0.009506	0.199963
glycoprotein 93 [Drosophila melanogaster]	0	1.4427e-06
Cluster of lipophorin receptor 1, isoform K [Drosophila melanogaster] (NP_001097934.2)	0	1.4427e-06
lipophorin receptor 1, isoform K [Drosophila melanogaster]	0	1.4427e-06
lipophorin receptor 1, isoform S [Drosophila melanogaster]	0	1.4427e-06
heat shock protein cognate 5, isoform B [Drosophila melanogaster]	-0.01235	0.26463
non-claret disjunctional, isoform B [Drosophila melanogaster]	0.01397	0.302575
regulatory particle triple-A ATPase 6 [Drosophila melanogaster]	-0.03022	0.726064
ribosomal protein L9, isoform C [Drosophila melanogaster]	-0.01844	0.411297
Rab7, isoform C [Drosophila melanogaster]	0	1.4427e-06
chorion protein b at 7F, isoform A [Drosophila melanogaster]	-0.006173	0.126995
Gamma-interferon-inducible lysosomal thiol reductase 1 [Drosophila melanogaster]	-0.0302	0.725615
lethal (1) G0156, isoform C [Drosophila melanogaster]	-0.02404	0.555808
Lon protease, isoform C [Drosophila melanogaster]	0.01397	0.302575
clathrin heavy chain, isoform G [Drosophila melanogaster]	-0.01173	0.250378
deadhead, isoform B [Drosophila melanogaster]	-0.02065	0.467107
spindle assembly abnormal 4 [Drosophila melanogaster]	0.01397	0.302575
Cluster of G protein alpha q subunit, isoform D [Drosophila melanogaster] (NP_725196.1)	0	1.4427e-06
G protein alpha q subunit, isoform D [Drosophila melanogaster]	0	1.4427e-06
uncharacterized protein Dmel_CG30054, isoform E [Drosophila melanogaster]	0	1.4427e-06
uncharacterized protein Dmel_CG30054, isoform F [Drosophila melanogaster]	0	1.4427e-06
chorion protein a at 7F [Drosophila melanogaster]	0	1.4427e-06
uncharacterized protein Dmel_CG15293, isoform C [Drosophila melanogaster]	0.002793	0.0561717
belle, isoform B [Drosophila melanogaster]	-0.02407	0.556635
beta spectrin, isoform A [Drosophila melanogaster]	0	1.4427e-06
ribosomal protein L35A [Drosophila melanogaster]	-0.008318	0.173598
yellow-g2 [Drosophila melanogaster]	-0.006173	0.126995
ribosomal protein L36, isoform E [Drosophila melanogaster]	-0.04074	1.04378
succinate dehydrogenase, subunit A (flavoprotein), isoform C [Drosophila melanogaster]	-0.01235	0.26463
Cluster of Rab6, isoform B [Drosophila melanogaster] (NP_001285869.1)	-0.005556	0.113823
Rab6, isoform B [Drosophila melanogaster]	-0.005556	0.113823
Rab39, isoform B [Drosophila melanogaster]	0	1.4427e-06
chorion protein 18 [Drosophila melanogaster]	-0.0005863	0.0116142
uncharacterized protein Dmel_CG30069 [Drosophila melanogaster]	0	1.4427e-06
Rab5, isoform I [Drosophila melanogaster]	0.002809	0.0564927
IGH1M_MOUSE RecName: Full=Ig gamma-1 chain C region, membrane-bound form	0.002793	0.0561717
La related protein, isoform H [Drosophila melanogaster]	0.005	0.102066
chorion protein 19 [Drosophila melanogaster]	0	1.4427e-06
swallow [Drosophila melanogaster]	0.008427	0.176005
wispy, isoform B [Drosophila melanogaster]	0.00284	0.057129
Sarco/endoplasmic reticulum Ca(2+)-ATPase, isoform A [Drosophila melanogaster]	-0.006173	0.126995
ribosomal protein L31, isoform C [Drosophila melanogaster]	-0.01568	0.343483
argonaute 2, isoform B [Drosophila melanogaster]	-0.003934	0.0797326
secreted Wg-interacting molecule, isoform B [Drosophila melanogaster]	0	1.4427e-06
Isoleucyl-tRNA synthetase, isoform D [Drosophila melanogaster]	0.01398	0.302945
Rap1 GTPase, isoform C [Drosophila melanogaster]	0	1.4427e-06
CG8507 [Drosophila melanogaster]	0.005587	0.114483
Rab2, isoform B [Drosophila melanogaster]	0	1.4427e-06
cyclophilin 1 [Drosophila melanogaster]	-0.01852	0.41324
prophenoloxidase 2 [Drosophila melanogaster]	-0.01573	0.344612
transforming acidic coiled-coil protein, isoform N [Drosophila melanogaster]	0.005618	0.11515
sister of feo, isoform B [Drosophila melanogaster]	0	1.4427e-06
vitelline membrane 26Aa, isoform B [Drosophila melanogaster]	-0.00338	0.0682307
Cluster of wings up A, isoform A [Drosophila melanogaster] (NP_728141.1)	0	1.4427e-06
wings up A, isoform A [Drosophila melanogaster]	0	1.4427e-06
wings up A, isoform F [Drosophila melanogaster]	0	1.4427e-06
transferrin 1, isoform C [Drosophila melanogaster]	-0.03086	0.744627
chorion protein 15 [Drosophila melanogaster]	0	1.4427e-06
cctgamma, isoform D [Drosophila melanogaster]	-0.01235	0.26463
ribosomal protein S24 [Drosophila melanogaster]	0.00838	0.174965
gamma-Tubulin at 37C, isoform B [Drosophila melanogaster]	-0.006759	0.139604
female-specific independent of transformer [Drosophila melanogaster]	-0.008935	0.187249
CG4447 [Drosophila melanogaster]	-0.01235	0.26463
T-cp1zeta [Drosophila melanogaster]	-0.009552	0.201009
CG8036, isoform D [Drosophila melanogaster]	-0.01852	0.41324
twinstar [Drosophila melanogaster]	-0.01852	0.41324
peroxin 14 [Drosophila melanogaster]	0.005587	0.114483
regulatory particle triple-A ATPase 1 [Drosophila melanogaster]	-0.0179	0.397876
uncharacterized protein Dmel_CG33923 [Drosophila melanogaster]	0	1.4427e-06
Cluster of vacuolar H[+] ATPase 68 kDa subunit 2, isoform F [Drosophila melanogaster] (NP_001260425.1)	0	1.4427e-06
vacuolar H[+] ATPase 68 kDa subunit 2, isoform F [Drosophila melanogaster]	0	1.4427e-06
vacuolar H[+] ATPase 68kD subunit 3 [Drosophila melanogaster]	0	1.4427e-06
Cluster of troponin C at 73F, isoform C [Drosophila melanogaster] (NP_001287091.1)	0.002809	0.0564927
troponin C at 73F, isoform C [Drosophila melanogaster]	0.002809	0.0564927
troponin C at 47D, isoform B [Drosophila melanogaster]	0	1.4427e-06
chorion protein 38, isoform B [Drosophila melanogaster]	0	1.4427e-06
roadkill, isoform C [Drosophila melanogaster]	0.008396	0.175312
ADP ribosylation factor at 102F, isoform B [Drosophila melanogaster]	0.002809	0.0564927
Rho1, isoform F [Drosophila melanogaster]	0	1.4427e-06
Grip71 [Drosophila melanogaster]	0.005587	0.114483
elongation factor 1 beta, isoform C [Drosophila melanogaster]	-0.006173	0.126995
Aspartyl-tRNA synthetase, isoform B [Drosophila melanogaster]	3.103e-05	0.000611832
IGHG_RABIT RecName: Full=Ig gamma chain C region	0	1.4427e-06
Rho guanine nucleotide exchange factor at 64C, isoform B [Drosophila melanogaster]	0	1.4427e-06
uncharacterized protein Dmel_CG13084 [Drosophila melanogaster]	0	1.4427e-06
bonus, isoform B [Drosophila melanogaster]	0.002793	0.0561717
uncharacterized protein Dmel_CG15735 [Drosophila melanogaster]	4.673e-05	0.000922177
uncharacterized protein Dmel_CG13364 [Drosophila melanogaster]	-0.01235	0.26463
Cluster of Rac1, isoform B [Drosophila melanogaster] (NP_001261247.1)	0	1.4427e-06
Rac1, isoform B [Drosophila melanogaster]	0	1.4427e-06
Rac2, isoform B [Drosophila melanogaster]	0	1.4427e-06
Lysyl-tRNA synthetase, isoform C [Drosophila melanogaster]	0.005587	0.114483
uncharacterized protein Dmel_CG11876, isoform A [Drosophila melanogaster]	-0.01235	0.26463
CG7637 [Drosophila melanogaster]	0	1.4427e-06
atilla, isoform C [Drosophila melanogaster]	-0.01235	0.26463
THIO_ECOLI RecName: Full=Thioredoxin-1; Short=Trx-1	-0.01235	0.26463
Pi4KIIalpha, isoform B [Drosophila melanogaster]	0	1.4427e-06
CG8258 [Drosophila melanogaster]	-0.006173	0.126995
CG5525 [Drosophila melanogaster]	-0.01235	0.26463
uncharacterized protein Dmel_CG11381 [Drosophila melanogaster]	0	1.4427e-06

[truncated: 1 more sheets: Plotted WT v. H2Av-GFP]
