# Supplementary material for: The GNU subunit of PNG kinase, the developmental regulator of mRNA translation, binds BIC-C to localize to RNP granules
Source: eLife. 2021 Jul 12;10:e67294. doi: 10.7554/eLife.67294 (PMC8313231; doi:10.7554/eLife.67294)
Supplement: Figure 1—figure supplement 3—source data 1. — Bar graph of quantification is in Figure 1—figure supplement 3. [file elife-67294-fig1-figsupp3-data1.xlsx]

## Sheet: Sheet1
Figure 1-Source Data 1
Quantification of western blots shown in Figure 1A.
Replicate	Sample	Raw GFP	Raw BICC	Normalized GFP	Normalized BICC	BICC norm to WT		Average	SD
1	GNU-WT-GFP	10156.3	5110.67	1	0.503203	1		1	0
	GNU-9A-GFP	1547.96	372.213	1	0.240454	0.477846		0.429269	0.242272
	GNU-deltaSAM-GFP	2937.88	68.778	1	0.0234107	0.0465234		0.0446835	0.00693819
	HIS2AV-GFP	1436.72	35.536	1	0.0247341	0.0491533		0.0378982	0.00894669
2	GNU-WT-GFP	12385.6	5765.26	1	0.465479	1
	GNU-9A-GFP	5483.33	1783.36	1	0.325232	0.698705
	GNU-deltaSAM-GFP	8328.62	202.021	1	0.0242562	0.0521103
	HIS2AV-GFP	6739.74	85.536	1	0.0126913	0.027265
3	GNU-WT-GFP	13145.3	5549.72	1	0.422181	1
	GNU-9A-GFP	9960.95	467.87	1	0.0469704	0.111256
	GNU-deltaSAM-GFP	8624.1	128.95	1	0.0149523	0.0354167
	HIS2AV-GFP	5143.81	80.95	1	0.0157374	0.0372763
Note: Each value is a biological replicate. Three biological replicates were performed.
Note: Each value represent intensity of WB for BIC-C or GFP signal normalized to GFP signal. All values are normalized to GNU-WT-GFP
