# Supplementary material for: The GNU subunit of PNG kinase, the developmental regulator of mRNA translation, binds BIC-C to localize to RNP granules
Source: eLife. 2021 Jul 12;10:e67294. doi: 10.7554/eLife.67294 (PMC8313231; doi:10.7554/eLife.67294)
Supplement: Figure 2—source data 2. [file elife-67294-fig2-data2.xlsx]

## Sheet: Sheet1
Figure 2-Source Data 1
Total counts for gnu rescue experiment results shown in Figure 2C.
Genotype	Normal cycle 12 to germband	Normal early cycles	Defective blastoderm	Defective early cycles	Few giant nuclei	Unfertilized
Oregon R (n = 203)	38	133	0	0	0	32
gnuwt-gfp1-5 (n = 381)	45	183	0	88	8	57
gnuwt-gfp1-8 (n = 308)	33	141	1	68	11	54
gnuΔSAM-gfp3-2 (n = 317)	0	46	11	111	100	49
gnuΔSAM-gfp3-8 (n = 301)	2	31	36	133	63	36
gnu305 (n = 213)	0	0	0	75	93	45
