# Supplementary material for: The GNU subunit of PNG kinase, the developmental regulator of mRNA translation, binds BIC-C to localize to RNP granules
Source: eLife. 2021 Jul 12;10:e67294. doi: 10.7554/eLife.67294 (PMC8313231; doi:10.7554/eLife.67294)
Supplement: Figure 4—source data 1. [file elife-67294-fig4-data1.xlsx]

## Sheet: Sheet1
Figure 4-Source Data 1
Quantification data for co-localization experiments shown in Figures 4 and Figure 4-Supplement 1.
Image	GFP+ granules	mkate2+ granules	Both+ granules	only GFP+	only mKate2+	Percent GFP	Percent mkate	Percent both GFP, Mkate	All (%)	Normalized Co-localization
gnu_gfp_gnu_mkate2_oocyte_1	314	327	261	53	66	13.9	17.4	68.7	100	0.98
gnu_gfp_gnu_mkate2_oocyte_2	177	199	152	25	47	11.2	21	67.9	100	0.97
gnu_gfp_gnu_mkate2_oocyte_3	347	350	281	66	69	15.9	16.6	67.5	100	0.97
gnu_gfp_gnu_mkate2_oocyte_4	261	267	212	49	55	15.5	17.4	67.1	100	0.96
gnu_gfp_gnu_mkate2_oocyte_5	457	453	387	70	66	13.4	12.6	74	100	1.06
gnu_gfp_gnu_mkate2_oocyte_6	491	438	391	100	47	18.6	8.7	72.7	100	1.04
gnu_gfp_gnu_mkate2_oocyte_7	335	310	253	82	57	20.9	14.5	64.5	100	0.92
gnu_gfp_gnu_mkate2_oocyte_8	259	232	213	46	19	16.5	6.8	76.6	100	1.1
AVERAGE						15.7	14.4	69.9
pdi_gfp_gnu_mkate2_oocyte_1	560	145	16	544	129	79	18.7	2.3	100	0.03
pdi_gfp_gnu_mkate2_oocyte_2	551	400	75	476	325	54.3	37.1	8.6	100	0.12
pdi_gfp_gnu_mkate2_oocyte_3	431	381	34	397	347	51	44.6	4.4	100	0.06
pdi_gfp_gnu_mkate2_oocyte_4	688	247	46	642	201	72.2	22.6	5.2	100	0.07
pdi_gfp_gnu_mkate2_oocyte_5	461	450	43	418	407	48.2	46.9	5	100	0.07
pdi_gfp_gnu_mkate2_oocyte_6	455	458	94	361	364	44.1	44.4	11.5	100	0.16
pdi_gfp_gnu_mkate2_oocyte_7	645	440	105	540	335	55.1	34.2	10.7	100	0.15
pdi_gfp_gnu_mkate2_oocyte_8	543	491	71	472	420	49	43.6	7.4	100	0.11
AVERAGE						56.6	36.5	6.9
tral_gfp_gnu_mkate2_oocyte_1	1403	553	541	862	12	60.9	0.8	38.2	100	0.55
tral_gfp_gnu_mkate2_oocyte_2	1152	335	313	839	22	71.5	1.9	26.7	100	0.38
tral_gfp_gnu_mkate2_oocyte_3	876	265	261	615	4	69.9	0.5	29.7	100	0.42
tral_gfp_gnu_mkate2_oocyte_4	708	287	276	432	11	60.1	1.5	38.4	100	0.55
tral_gfp_gnu_mkate2_oocyte_5	1332	461	447	885	14	65.8	1	33.2	100	0.48
tral_gfp_gnu_mkate2_oocyte_6	856	313	305	551	8	63.8	0.9	35.3	100	0.51
tral_gfp_gnu_mkate2_oocyte_7	1362	379	377	985	2	72.2	0.1	27.6	100	0.4
tral_gfp_gnu_mkate2_oocyte_8	1129	458	453	676	5	59.6	0.4	39.9	100	0.57
AVERAGE						65.5	0.9	33.6
me31b_gfp_gnu_mkate2_oocyte_1	637	339	318	319	21	48.5	3.2	48.3	100	0.69
me31b_gfp_gnu_mkate2_oocyte_2	429	343	272	157	71	31.4	14.2	54.4	100	0.78
me31b_gfp_gnu_mkate2_oocyte_3	536	458	386	150	72	24.7	11.8	63.5	100	0.91
me31b_gfp_gnu_mkate2_oocyte_4	602	501	405	197	96	28.2	13.8	58	100	0.83
me31b_gfp_gnu_mkate2_oocyte_5	299	224	197	102	27	31.3	8.3	60.4	100	0.86
me31b_gfp_gnu_mkate2_oocyte_6	392	278	245	147	33	34.6	7.8	57.6	100	0.82
me31b_gfp_gnu_mkate2_oocyte_7	408	273	256	152	17	35.8	4	60.2	100	0.86
me31b_gfp_gnu_mkate2_oocyte_8	604	601	451	153	150	20.3	19.9	59.8	100	0.86
AVERAGE						31.8	10.4	57.8
