# Supplementary material for: The GNU subunit of PNG kinase, the developmental regulator of mRNA translation, binds BIC-C to localize to RNP granules
Source: eLife. 2021 Jul 12;10:e67294. doi: 10.7554/eLife.67294 (PMC8313231; doi:10.7554/eLife.67294)
Supplement: Figure 5—source data 1. [file elife-67294-fig5-data1.xlsx]

## Sheet: Sheet1
Figure 5-Source Data 1
Quantification data for co-localization experiments shown in Figure 5A
Image	GFP+ granules	mkate2+ granules	Both+ granules	only GFP+	only mKate2+	Percent GFP	Percent mkate	Percent both GFP, Mkate	All (%)	Normalized Co-localization
bicc_gfp_gnu_mkate2_oocyte_1	601	371	363	238	8	39.1	1.3	59.6	100	0.85
bicc_gfp_gnu_mkate2_oocyte_2	718	387	372	346	15	47.2	2	50.8	100	0.73
bicc_gfp_gnu_mkate2_oocyte_3	808	403	394	414	9	50.7	1.1	48.2	100	0.69
bicc_gfp_gnu_mkate2_oocyte_4	672	420	403	269	17	39	2.5	58.5	100	0.84
bicc_gfp_gnu_mkate2_oocyte_5	600	371	356	244	15	39.7	2.4	57.9	100	0.83
bicc_gfp_gnu_mkate2_oocyte_6	632	362	360	272	2	42.9	0.3	56.8	100	0.81
bicc_gfp_gnu_mkate2_oocyte_7	779	403	398	381	5	48.6	0.6	50.8	100	0.73
bicc_gfp_gnu_mkate2_oocyte_8	854	415	413	441	2	51.5	0.2	48.2	100	0.69
AVERAGE						44.8	1.3	53.8
