# Supplementary material for: The GNU subunit of PNG kinase, the developmental regulator of mRNA translation, binds BIC-C to localize to RNP granules
Source: eLife. 2021 Jul 12;10:e67294. doi: 10.7554/eLife.67294 (PMC8313231; doi:10.7554/eLife.67294)
Supplement: Figure 6—source data 1. [file elife-67294-fig6-data1.xlsx]

## Sheet: Sheet1
Figure 6-Source Data 1
Quantification of western bots shown in Figure 6A.
Replicate	Sample	Raw GFP	Raw BICC	Normalized GFP	Normalized BICC	BICC norm to st14
20191219	GNU-WT-GFP st14	10329.6	7033.86	1	0.680943	1
	GNU-WT-GFP act egg	7112.47	7084.74	1	0.996101	1.46283
Note: Each value is a biological replicate. Only one biological replicate was performed.
Note: Each value represent intensity of WB for BIC-C or GFP signal normalized to GFP signal. All values are normalized to GNU-WT-GFP
