# Supplementary material for: The GNU subunit of PNG kinase, the developmental regulator of mRNA translation, binds BIC-C to localize to RNP granules
Source: eLife. 2021 Jul 12;10:e67294. doi: 10.7554/eLife.67294 (PMC8313231; doi:10.7554/eLife.67294)
Supplement: Figure 6—source data 3. [file elife-67294-fig6-data3.xlsx]

## Sheet: Results summary
Figure 6-Source Data 2
Relative levels of CYCB in mature oocytes expressing GNU transgenes.
gnuwt-gfp1-5					gnuwt-gfp1-8					gnu9A-gfp2-7					gnu9A-gfp2-8					gnudeltaSAM-gfp3-2					gnudeltaSAM-gfp3-8
1	1	1	1	1	0.89	1.18	1.52	0.86	1.332	1.77	1.94	1.94	1.87	1.22	1.297	1.38	1.26	0.92	1.03	0.8	0.8	0.72	0.96	0.66	0.787	0.526	1.051	1.024	1.532
Note: Each value is a biological replicate.
Note: Each value represent intensity of WB for CycB antibody notmalized to tubulin staining. All values are normalized to wt 1-5
Note: Statistical analysis is shown in next tab.

## Sheet: Statistical analysis
Figure 6-Source Data 2
Results of statistical significance analysis of CYCB levels
Table Analyzed	St14 relative cycB		Table Analyzed	St14 relative cycB		Table Analyzed	St14 relative cycB		Table Analyzed	St14 relative cycB		Table Analyzed	St14 relative cycB
Column B	gnuwt-gfp1-8		Column C	gnu9A-gfp2-7		Column E	gnudeltaSAM-gfp3-2		Column E	gnudeltaSAM-gfp3-2		Column D	gnu9A-gfp2-8
vs.	vs.		vs.	vs.		vs.	vs.		vs.	vs.		vs.	vs.
Column A	gnuwt-gfp1-5		Column A	gnuwt-gfp1-5		Column A	gnuwt-gfp1-5		Column A	gnuwt-gfp1-5		Column A	gnuwt-gfp1-5
Paired t test			Paired t test			Paired t test			Paired t test			Paired t test
P value	0.2855		P value	0.0053		P value	0.0137		P value	0.0137		P value	0.11
P value summary	ns		P value summary	**		P value summary	*		P value summary	*		P value summary	ns
Significantly different (P < 0.05)?	No		Significantly different (P < 0.05)?	Yes		Significantly different (P < 0.05)?	Yes		Significantly different (P < 0.05)?	Yes		Significantly different (P < 0.05)?	No
One- or two-tailed P value?	Two-tailed		One- or two-tailed P value?	Two-tailed		One- or two-tailed P value?	Two-tailed		One- or two-tailed P value?	Two-tailed		One- or two-tailed P value?	Two-tailed
t, df	t=1.232, df=4		t, df	t=5.515, df=4		t, df	t=4.203, df=4		t, df	t=4.203, df=4		t, df	t=2.047, df=4
Number of pairs	5		Number of pairs	5		Number of pairs	5		Number of pairs	5		Number of pairs	5
How big is the difference?			How big is the difference?			How big is the difference?			How big is the difference?			How big is the difference?
Mean of differences (B - A)	0.1564		Mean of differences (C - A)	0.748		Mean of differences (E - A)	-0.212		Mean of differences (E - A)	-0.212		Mean of differences (D - A)	0.1774
SD of differences	0.2839		SD of differences	0.3033		SD of differences	0.1128		SD of differences	0.1128		SD of differences	0.1937
SEM of differences	0.127		SEM of differences	0.1356		SEM of differences	0.05044		SEM of differences	0.05044		SEM of differences	0.08665
95% confidence interval	-0.1961 to 0.5089		95% confidence interval	0.3714 to 1.125		95% confidence interval	-0.3520 to -0.07196		95% confidence interval	-0.3520 to -0.07196		95% confidence interval	-0.06317 to 0.4180
R squared (partial eta squared)	0.275		R squared (partial eta squared)	0.8838		R squared (partial eta squared)	0.8154		R squared (partial eta squared)	0.8154		R squared (partial eta squared)	0.5117
How effective was the pairing?			How effective was the pairing?			How effective was the pairing?			How effective was the pairing?			How effective was the pairing?
Correlation coefficient (r)	Horizontal line		Correlation coefficient (r)	Horizontal line		Correlation coefficient (r)	Horizontal line		Correlation coefficient (r)	Horizontal line		Correlation coefficient (r)	Horizontal line
P value (one tailed)			P value (one tailed)			P value (one tailed)			P value (one tailed)			P value (one tailed)
P value summary			P value summary			P value summary			P value summary			P value summary
Was the pairing significantly effective?			Was the pairing significantly effective?			Was the pairing significantly effective?			Was the pairing significantly effective?			Was the pairing significantly effective?
