# Supplementary figures and images for: The GNU subunit of PNG kinase, the developmental regulator of mRNA translation, binds BIC-C to localize to RNP granules
Source: eLife journal article supplement (doi:10.7554/elife.67294), 2021-07-12

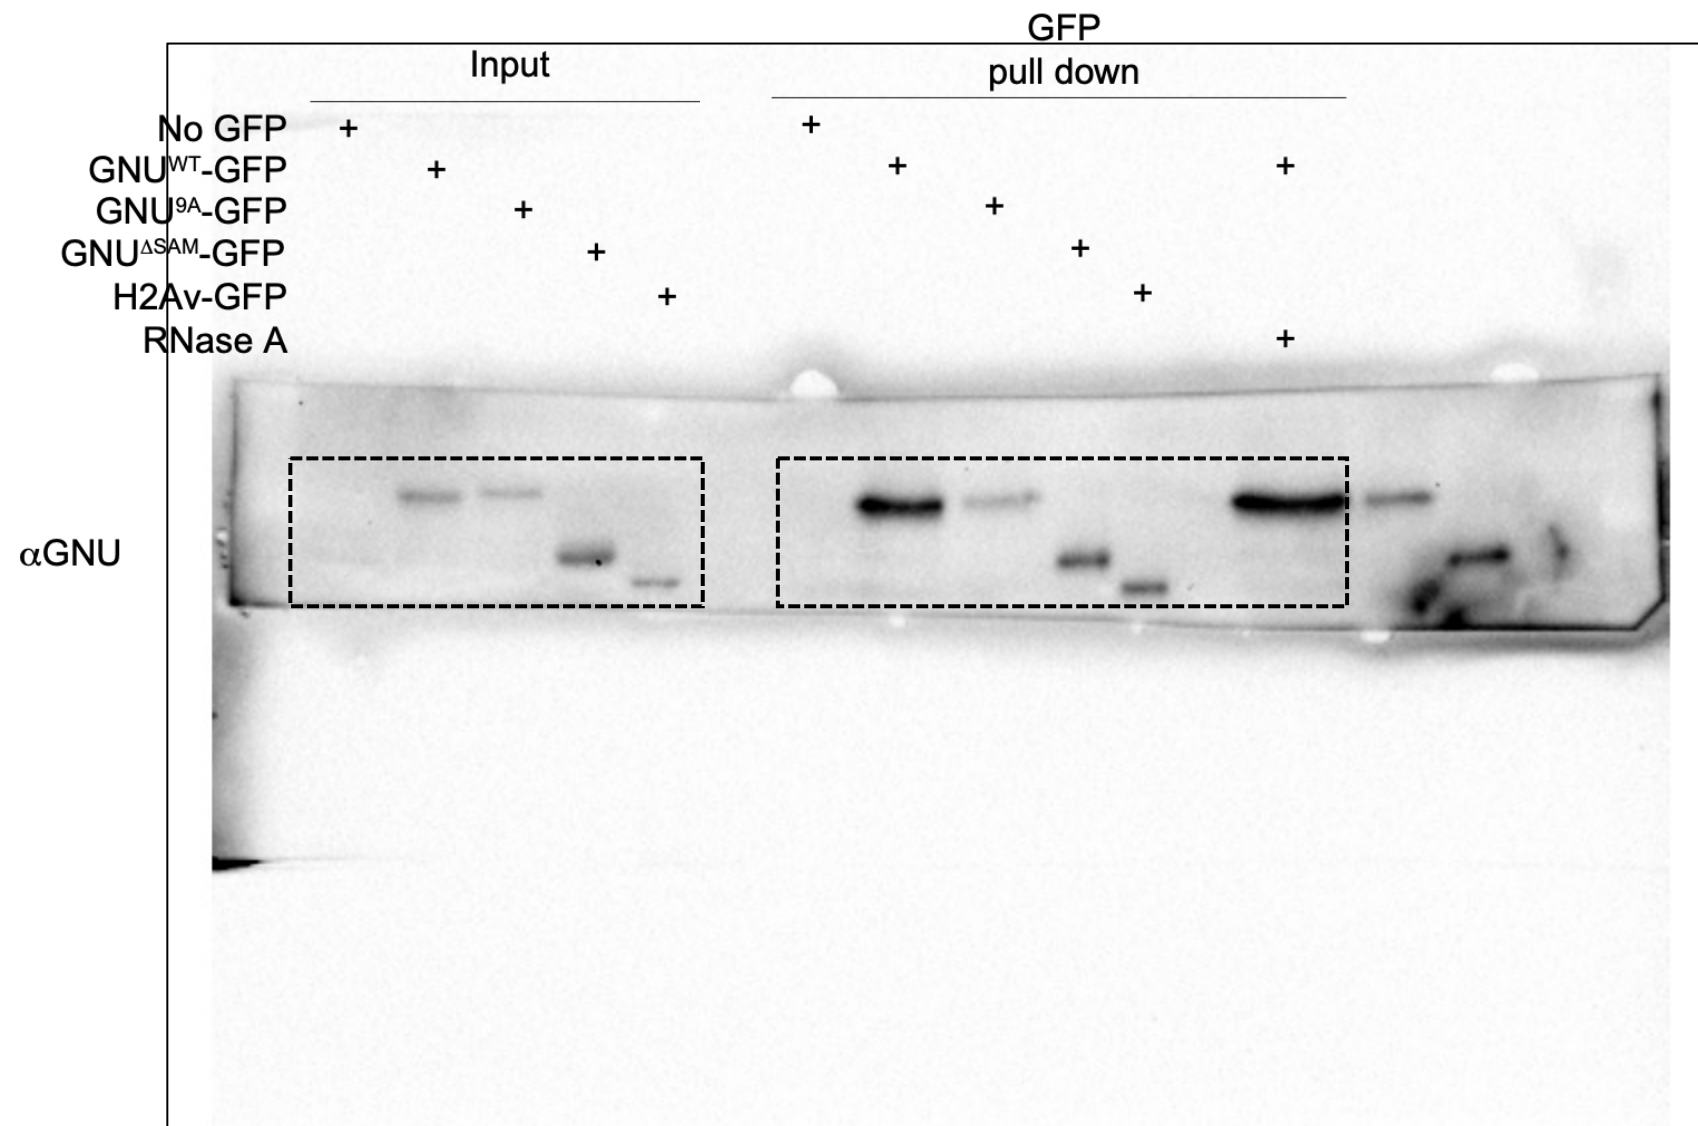

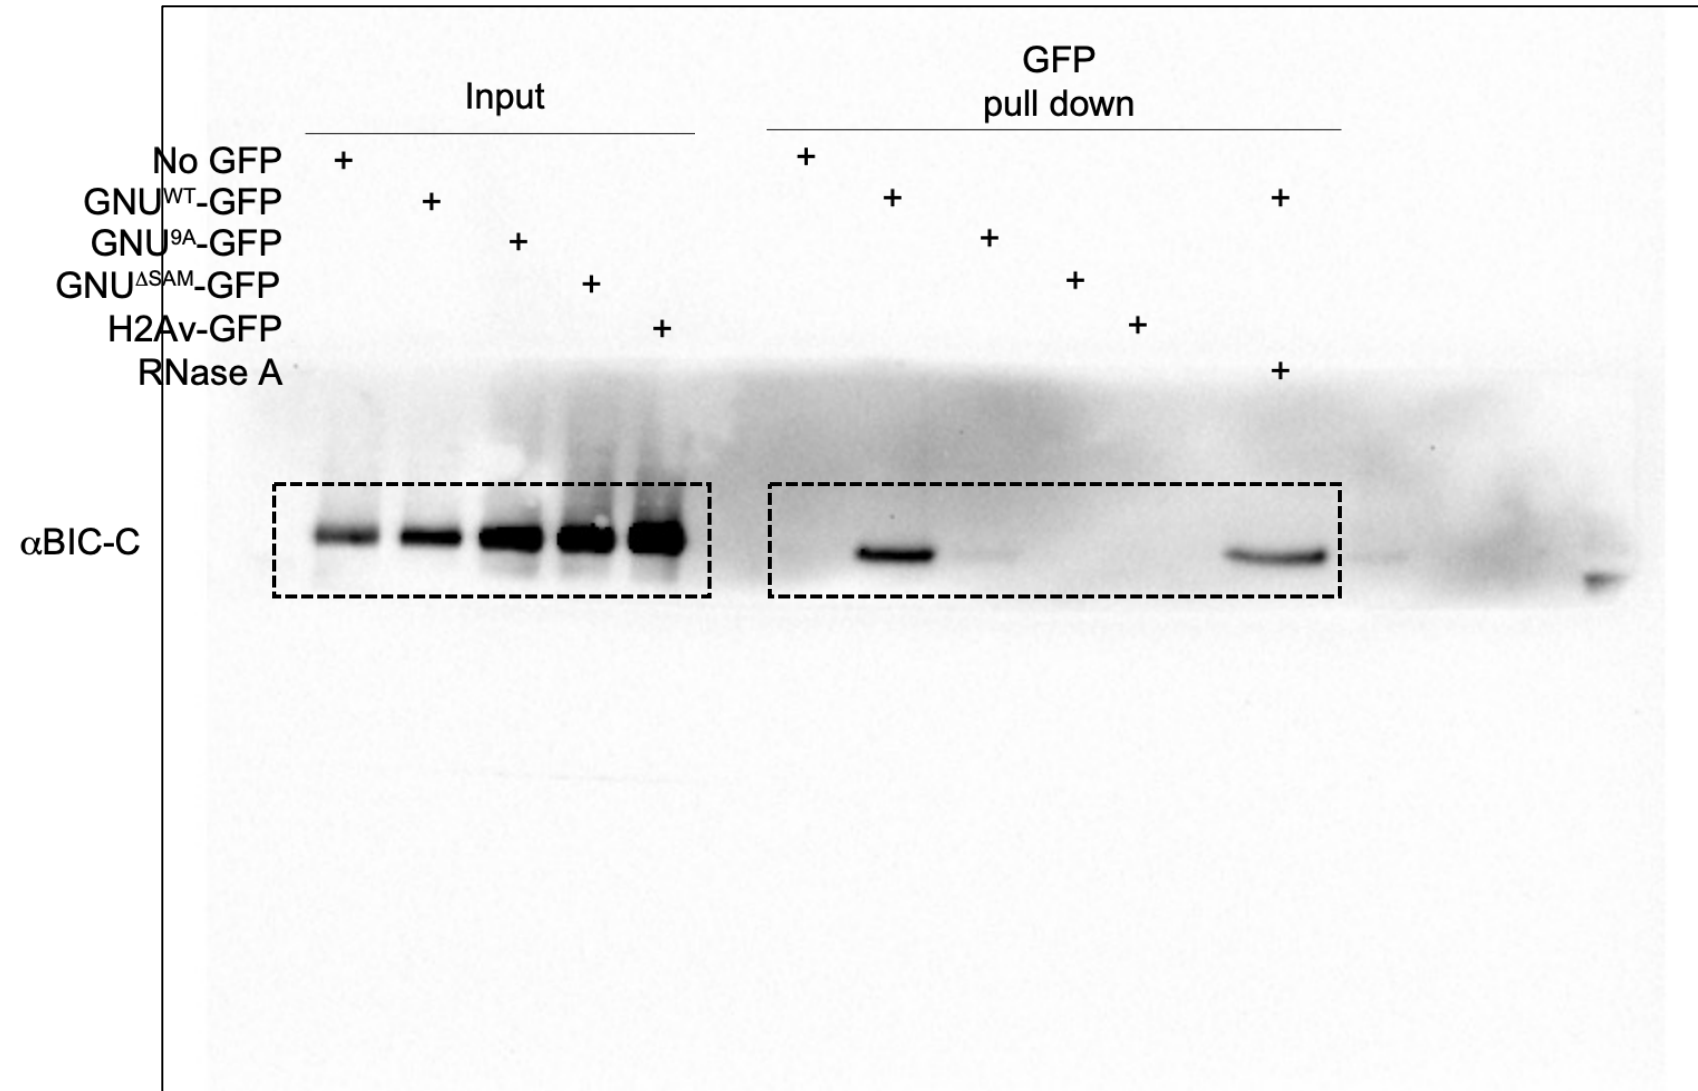

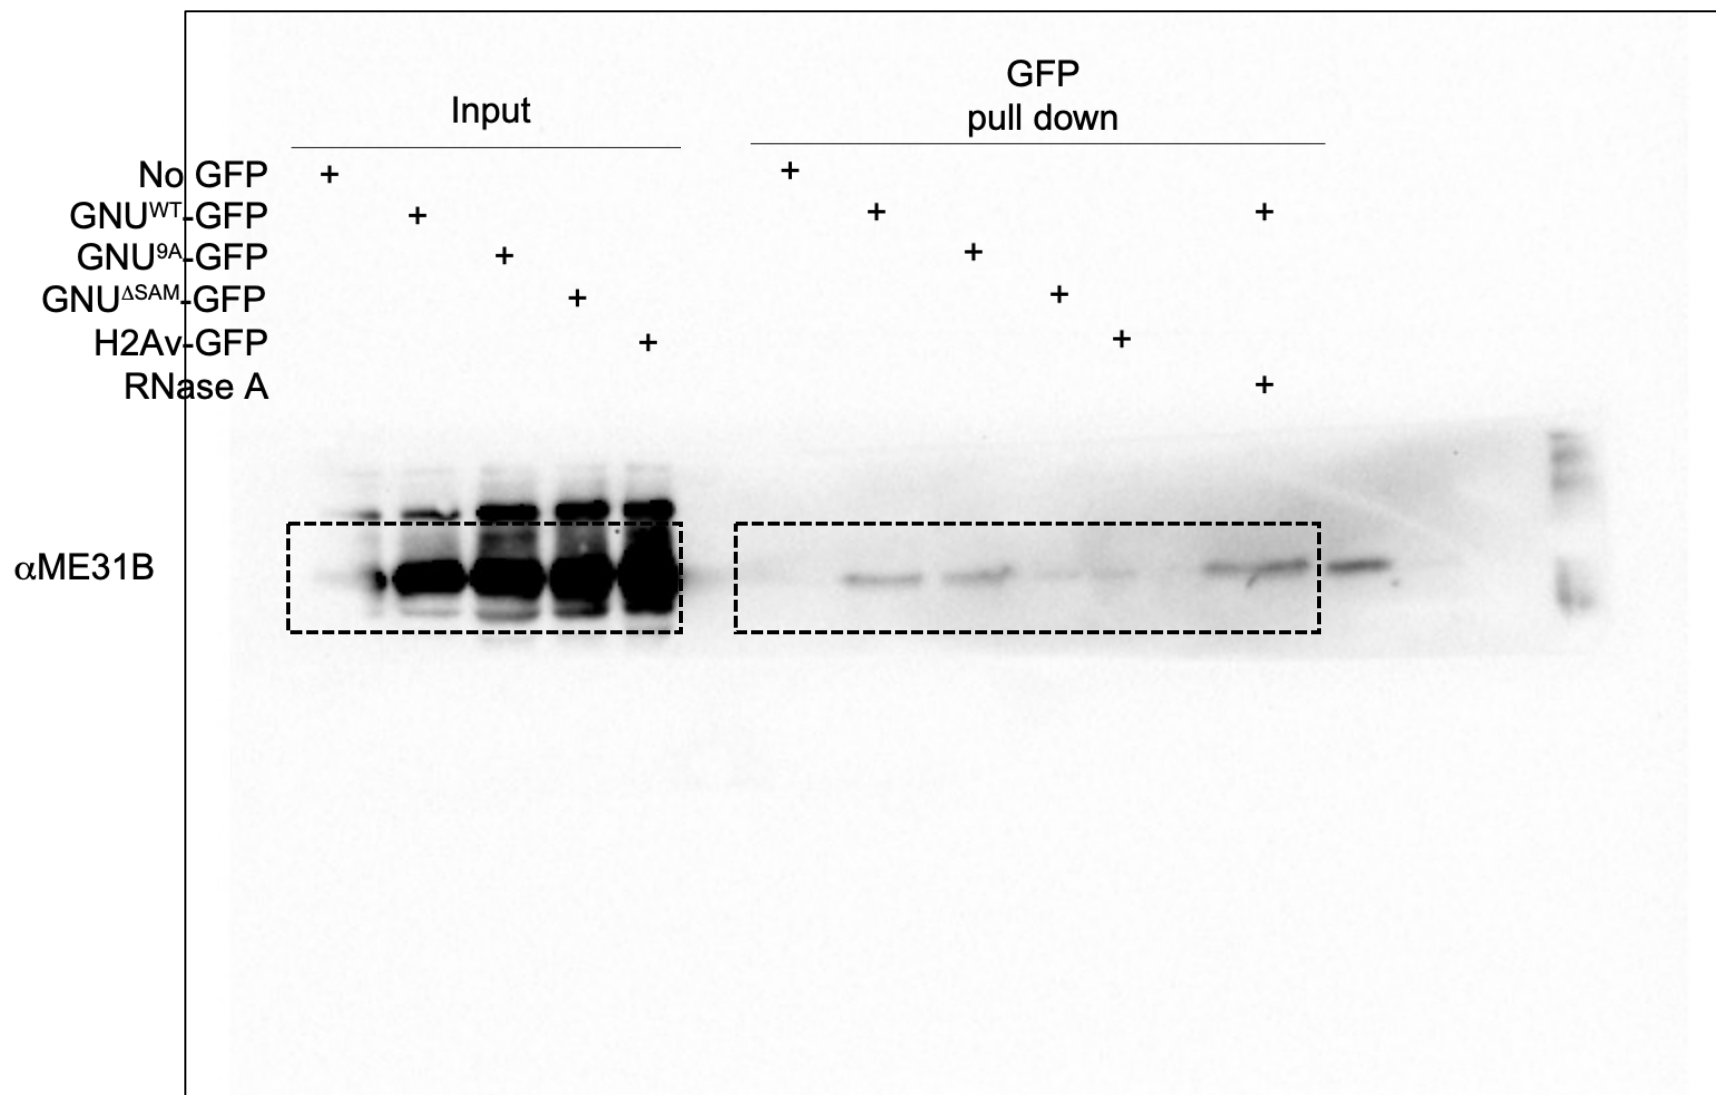

Supplement: fig1-data1 [file elife-67294-fig1-data1-v2.zip]

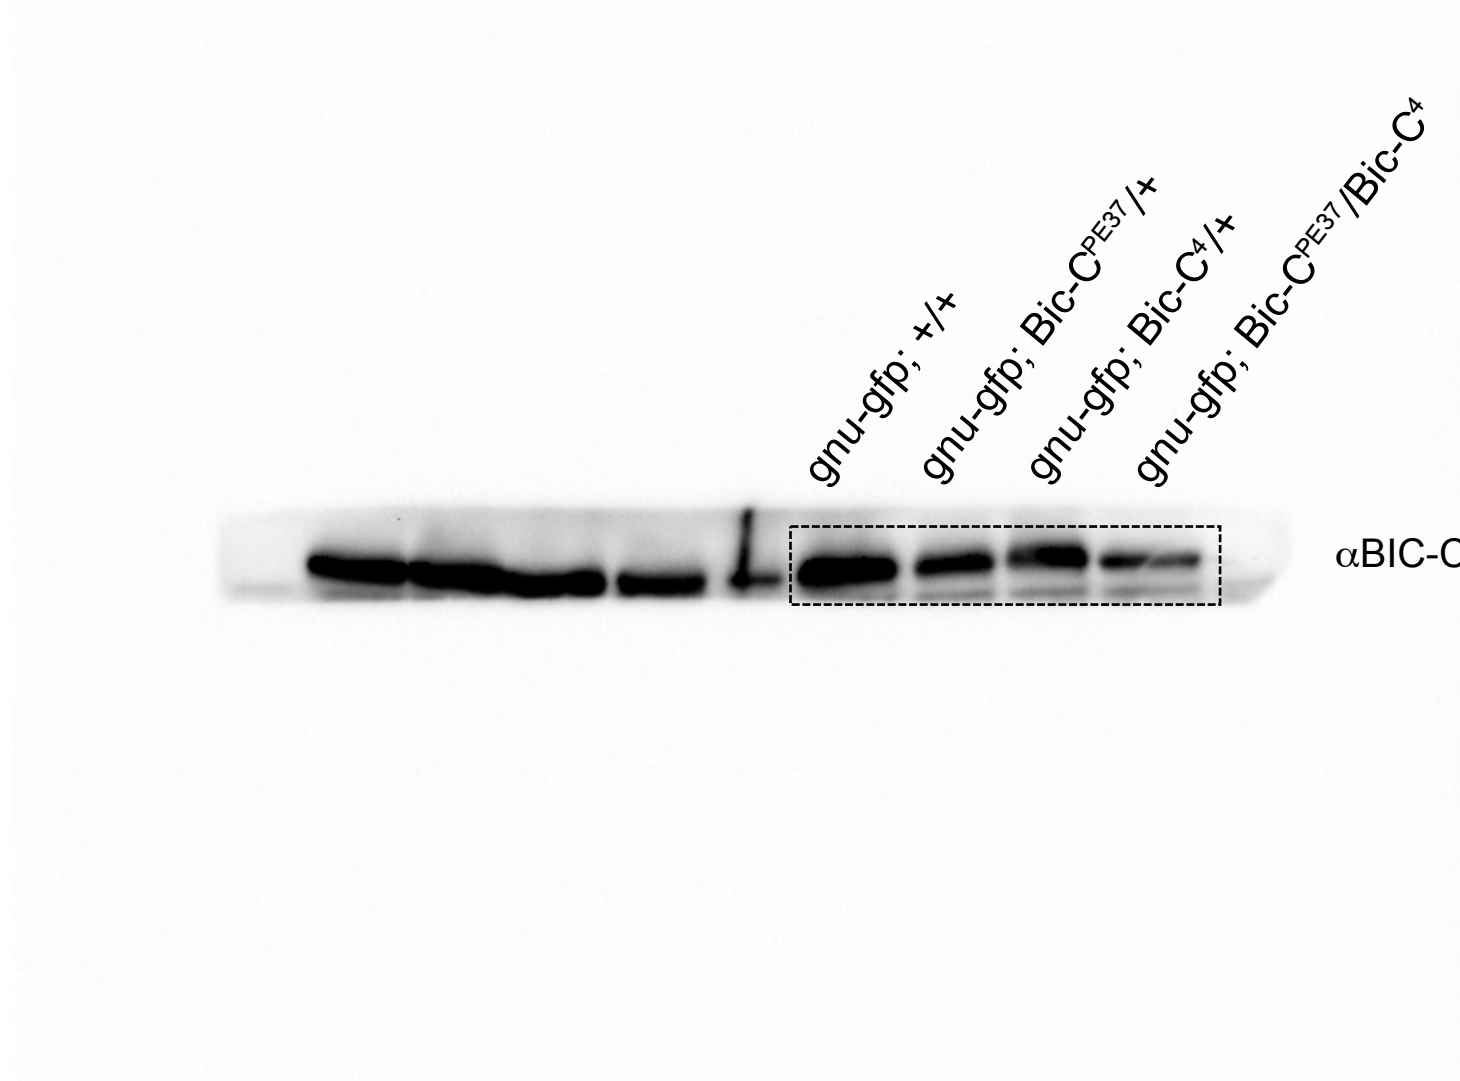

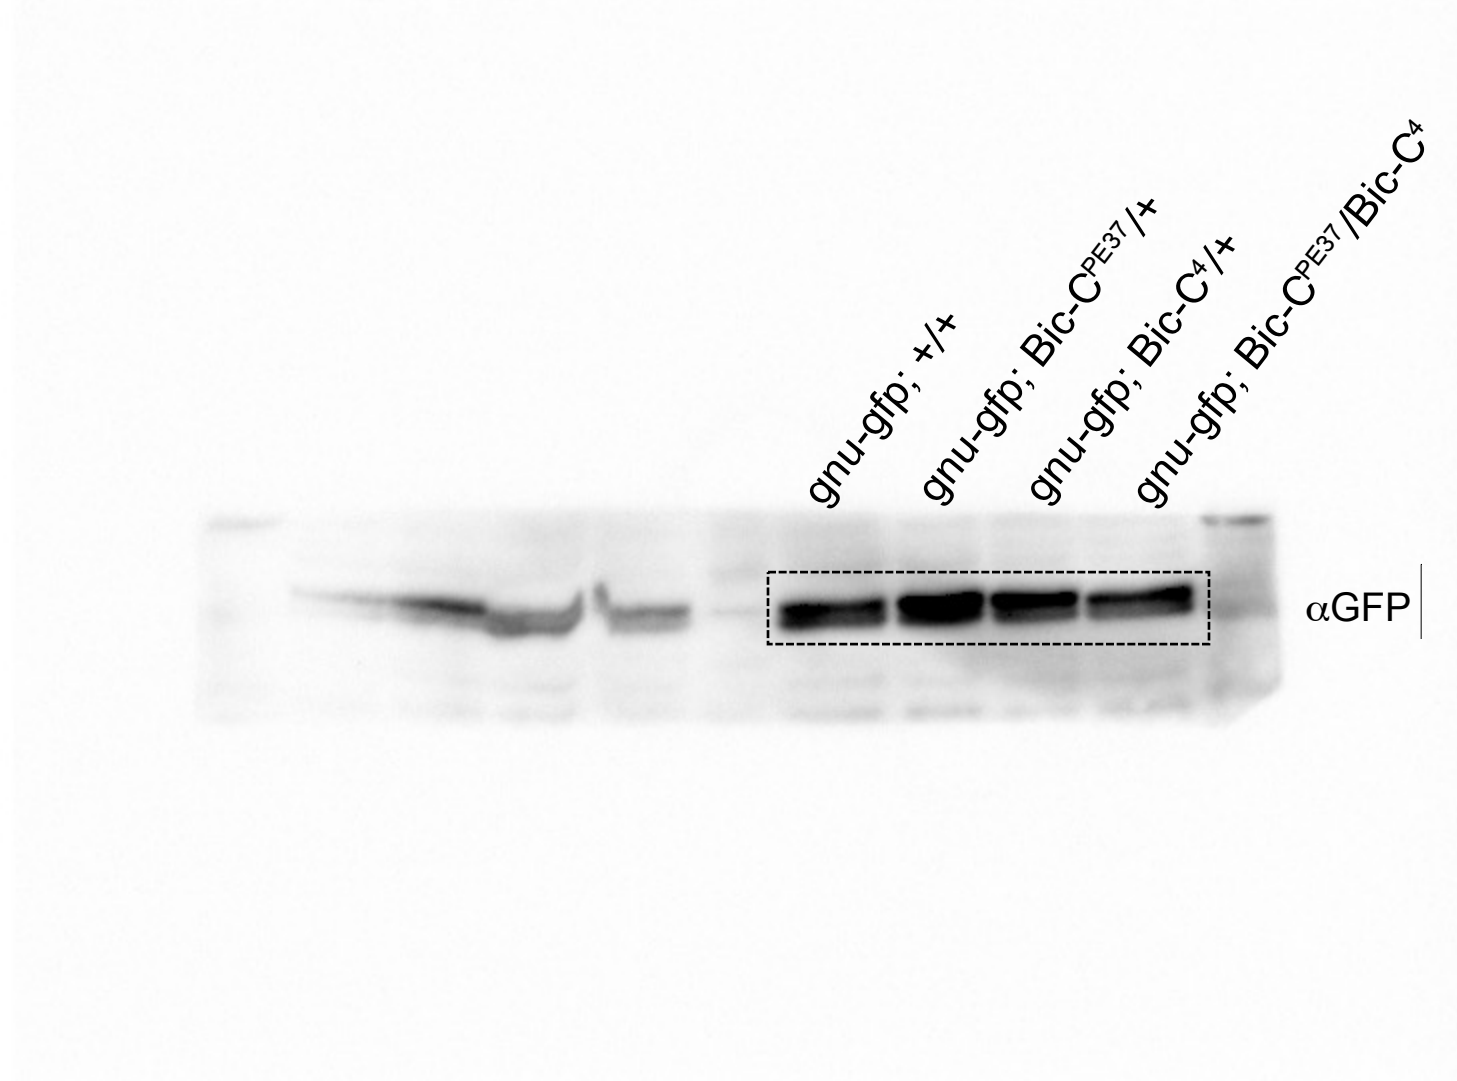

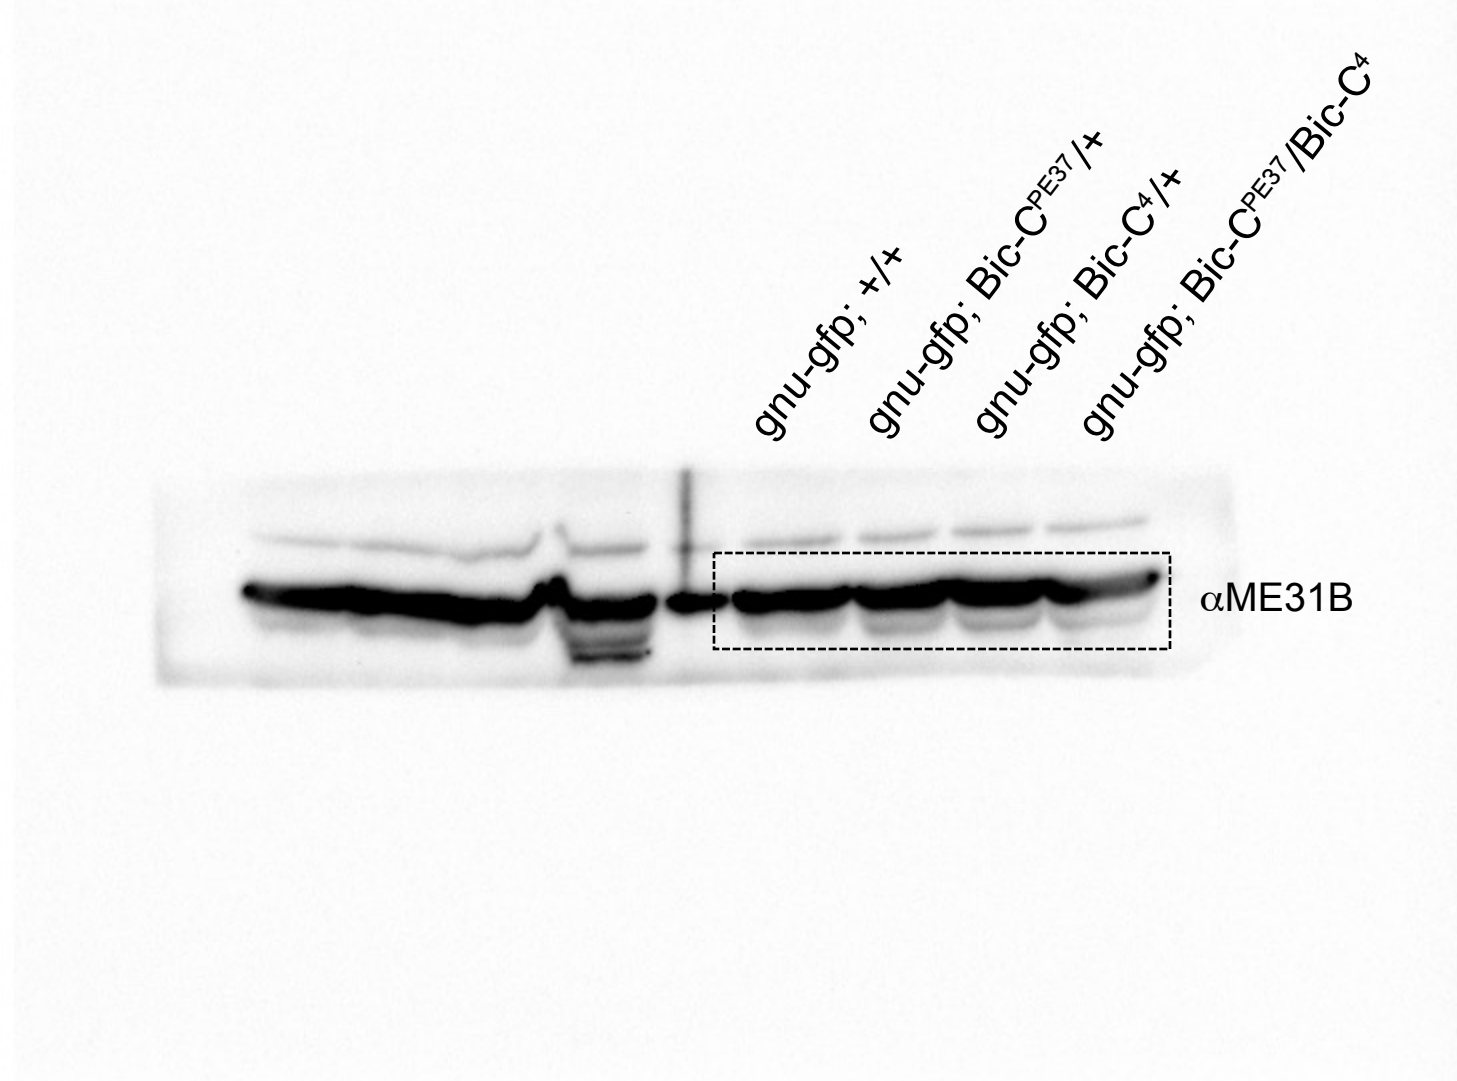

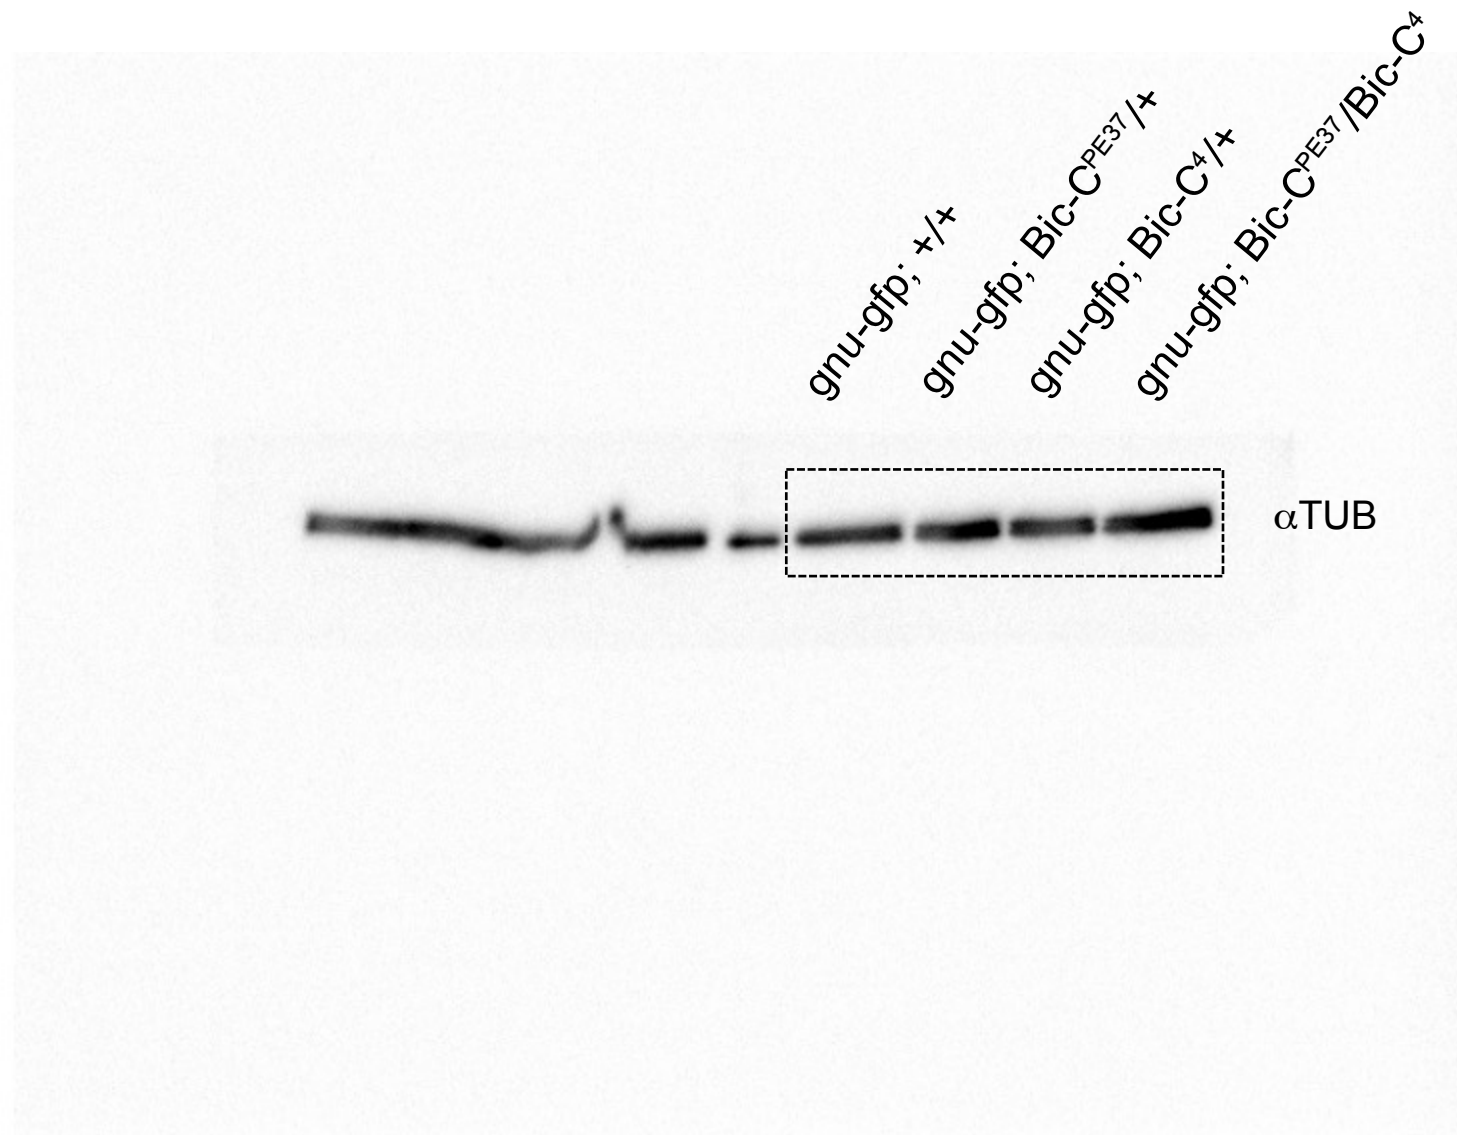

Supplement: fig5-figsupp1-data1 [file elife-67294-fig5-figsupp1-data1-v2.zip]

Figure 2A-Source data

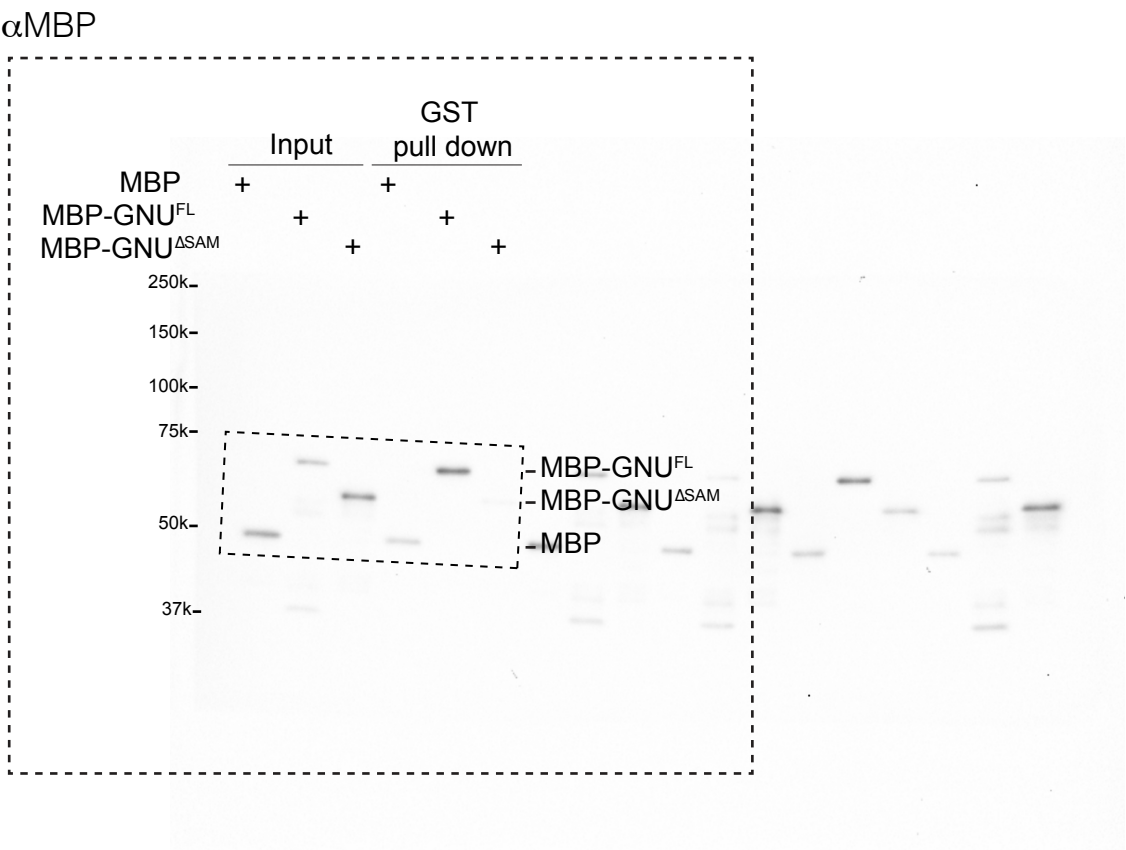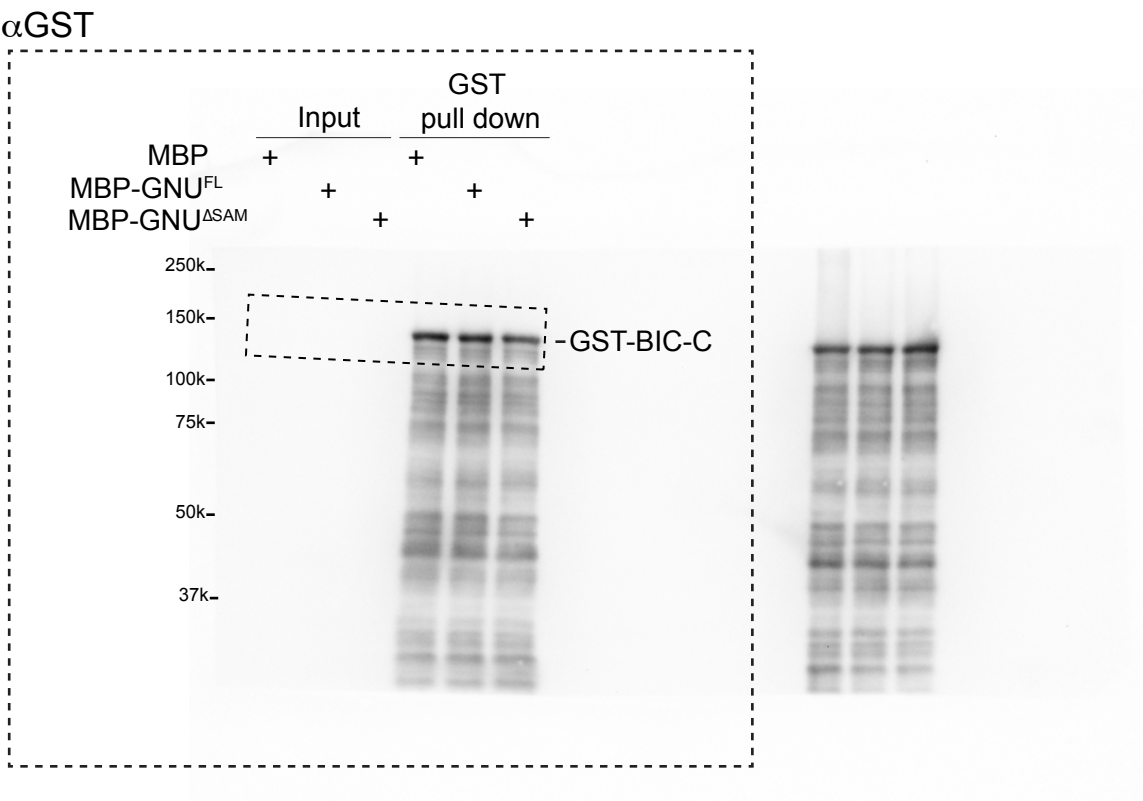

Supplement: supp [file Figure 2A-Source-data 1 labeled bands.pdf › Fig2A_source_data/Figure 2A-Source-data 1 labeled bands.pdf]

Figure 2E-Source data

Autoradiograph

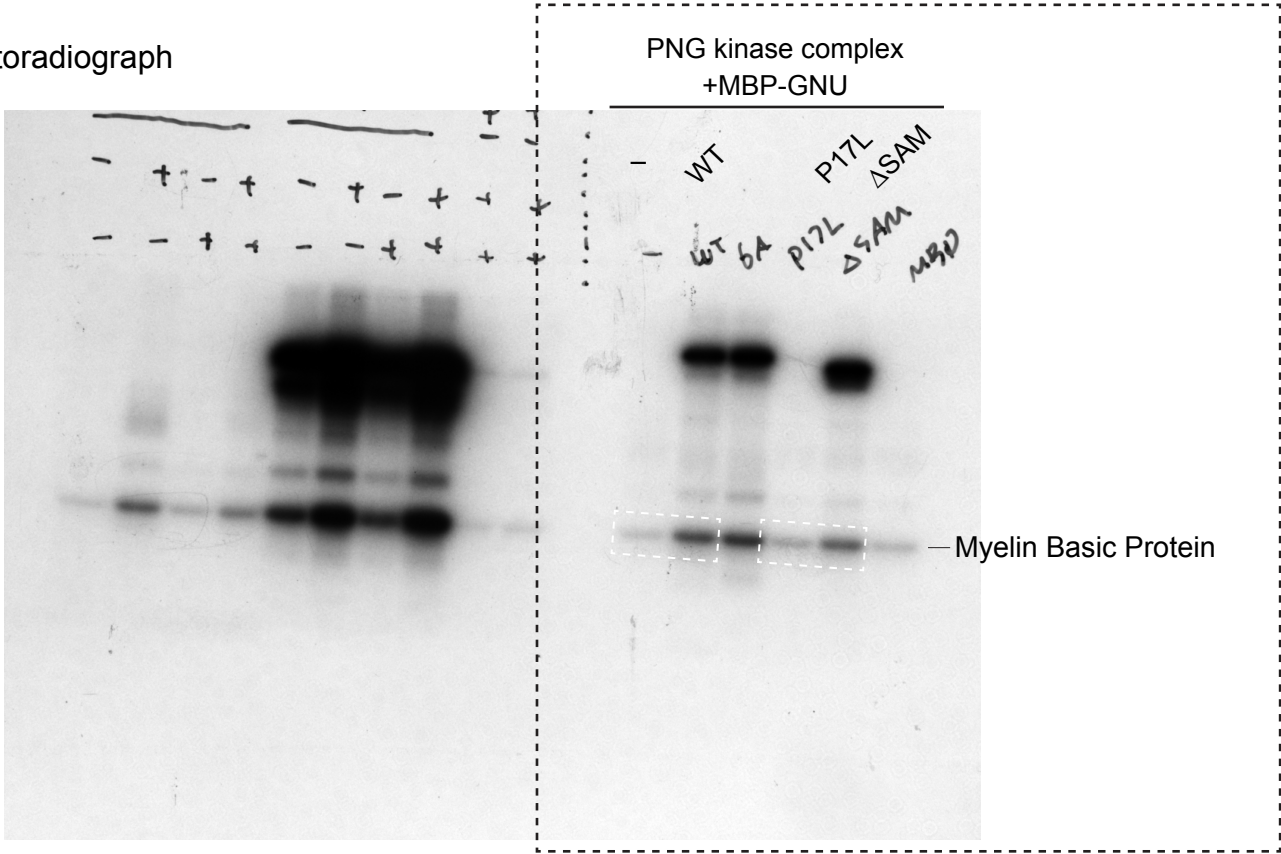

Coomassie

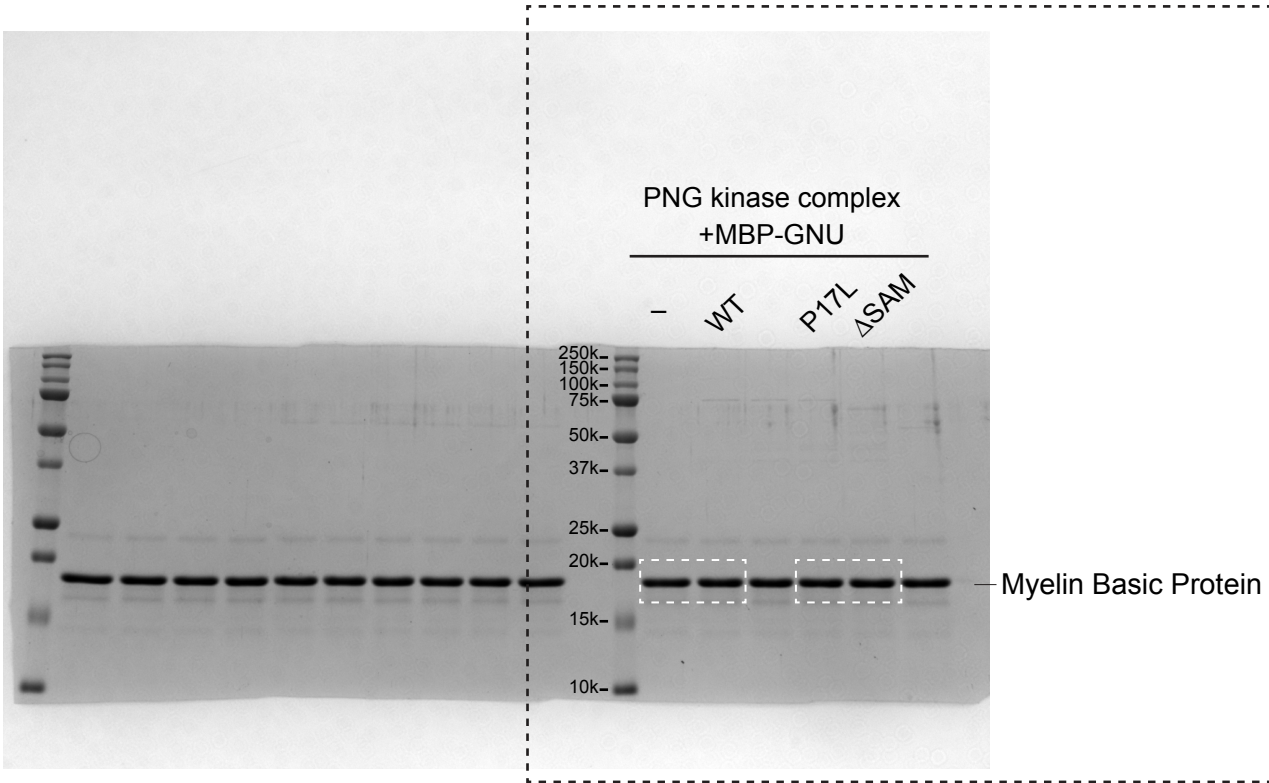

Supplement: supp [file Figure 2E-Source data 1 labeled bands.pdf › Fig2E_source_data/Figure 2E-Source data 1 labeled bands.pdf]

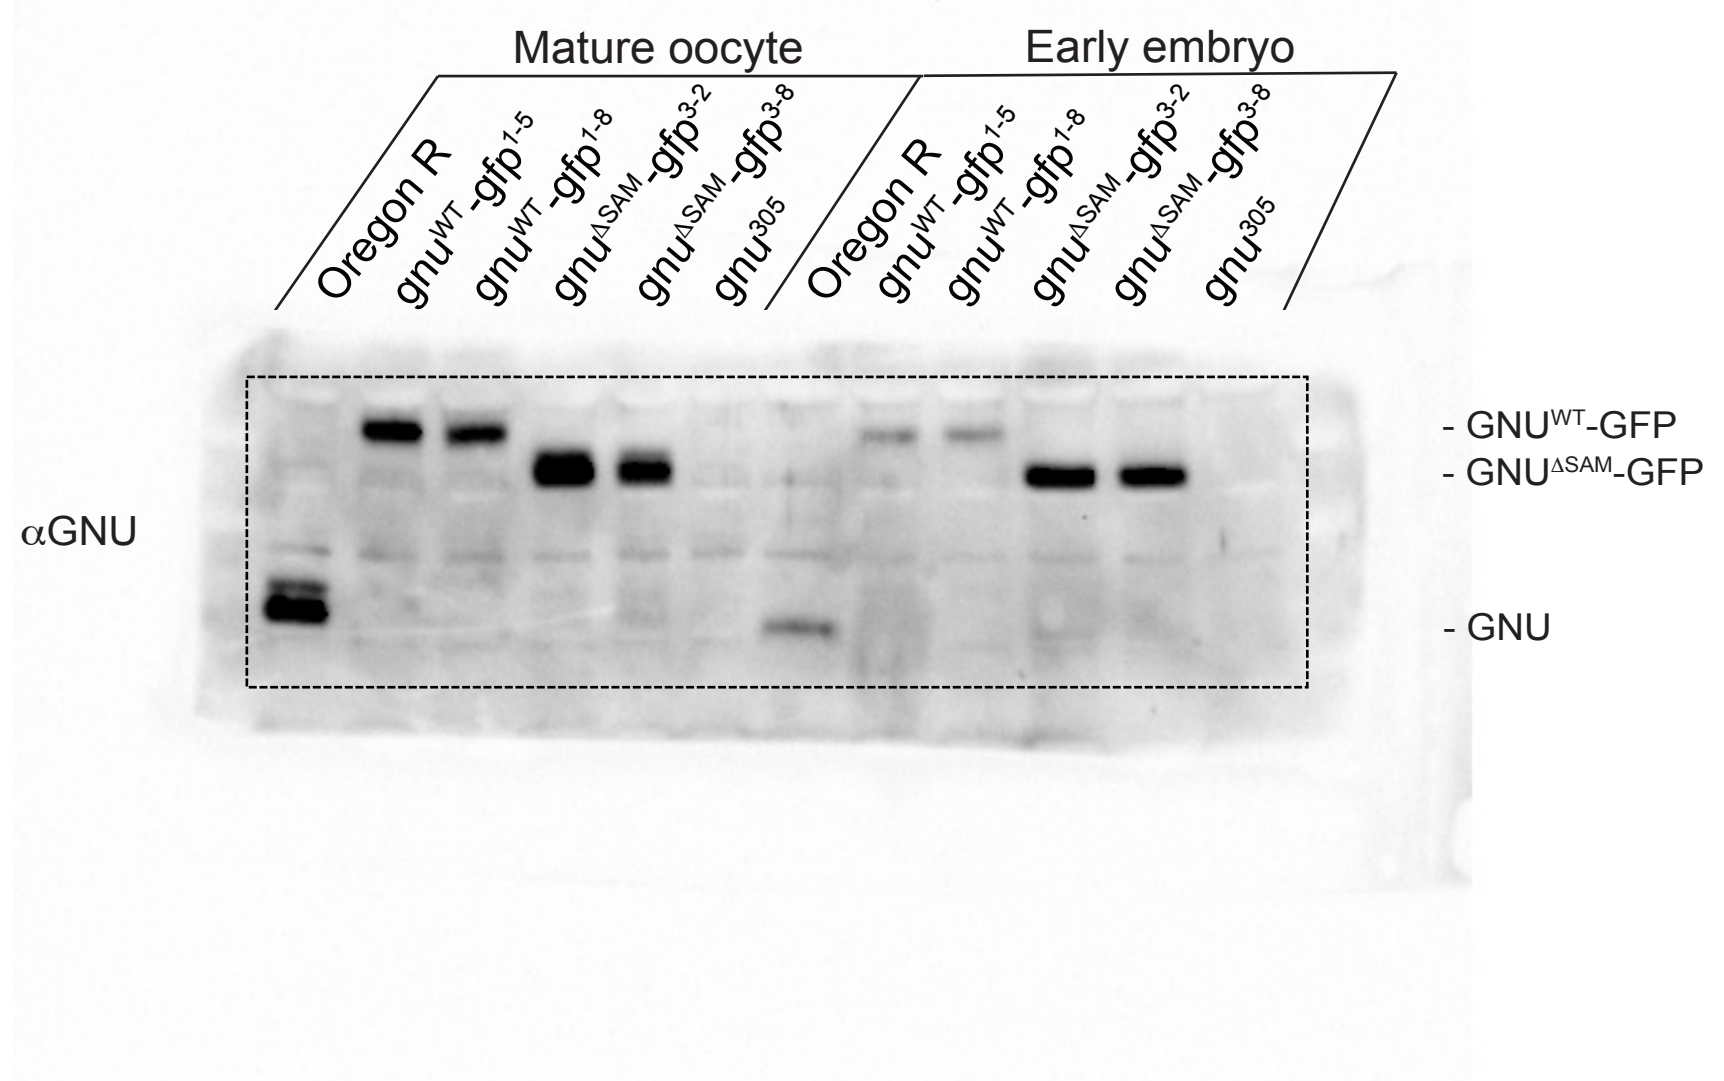

$\alpha$ CYC

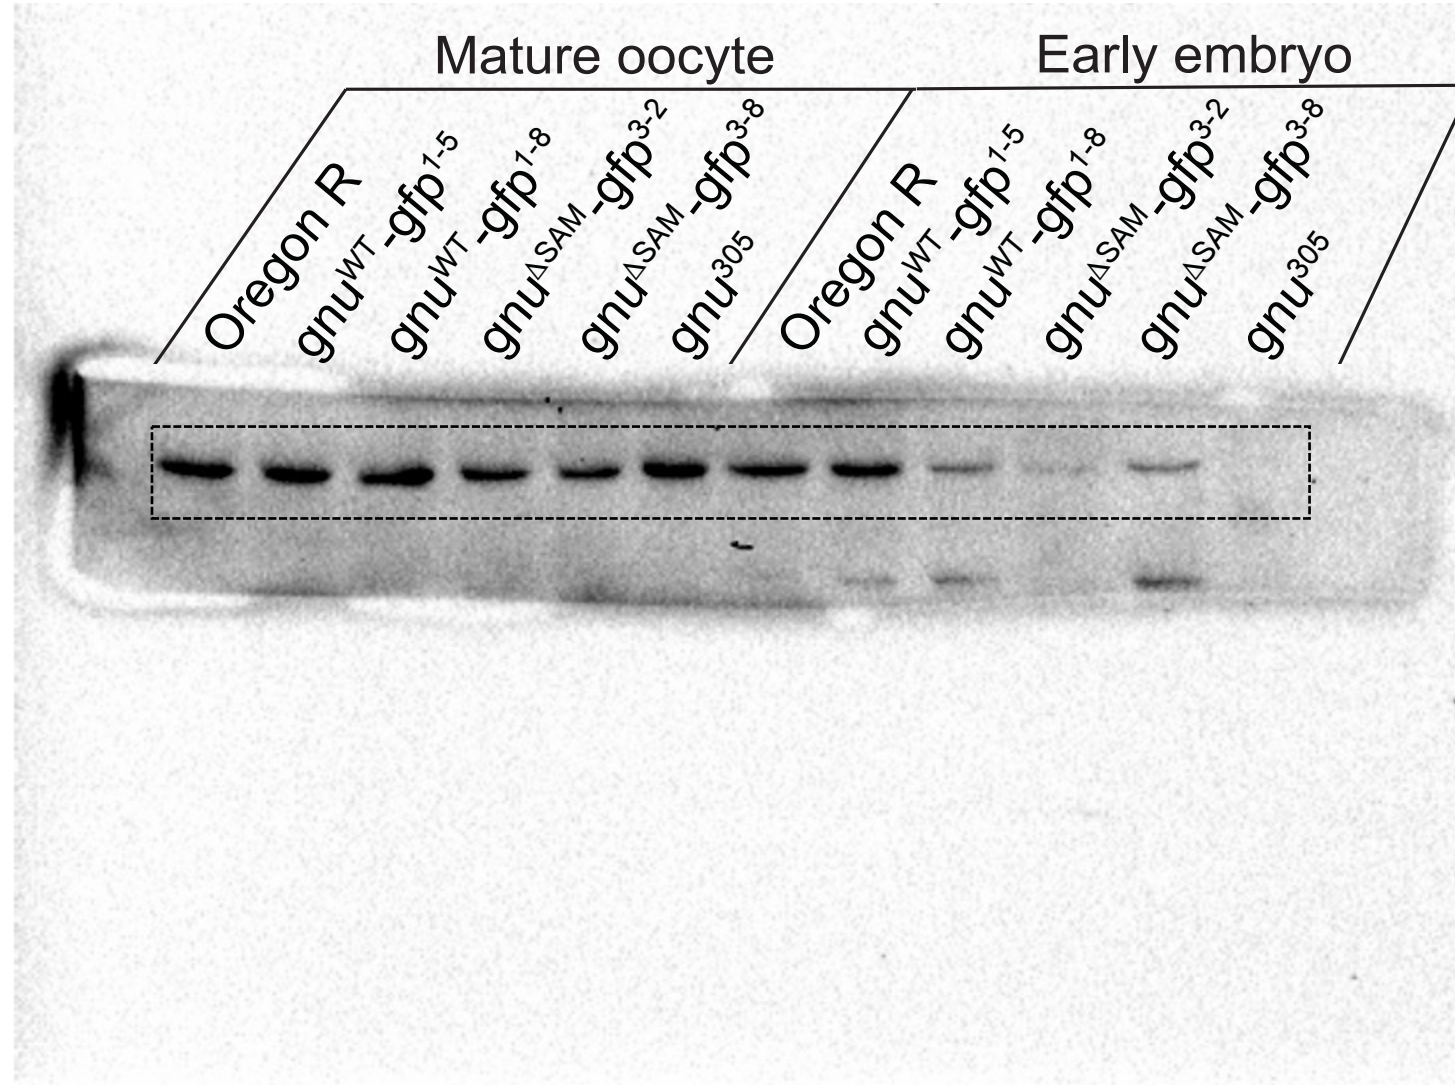

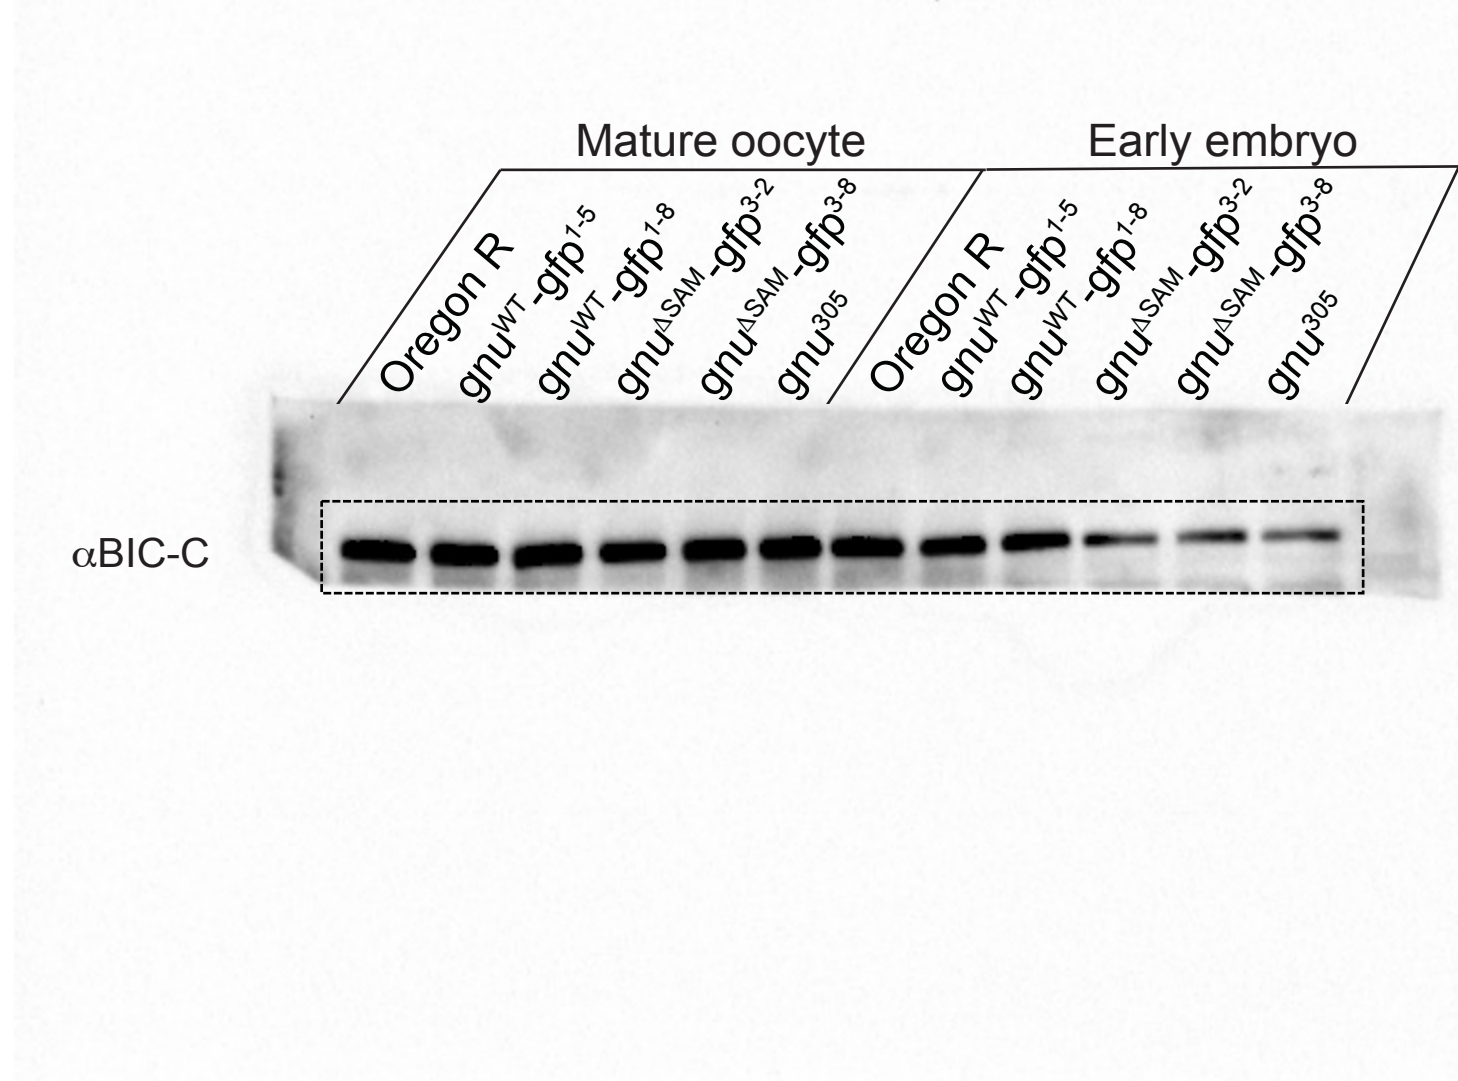

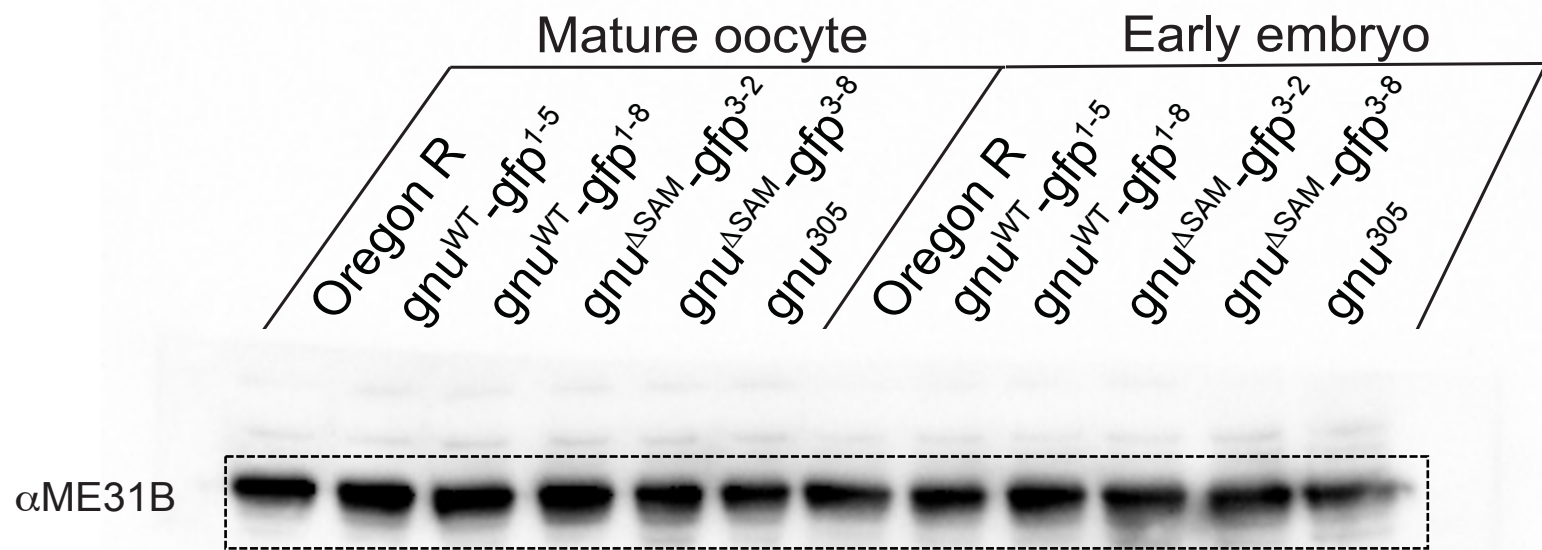

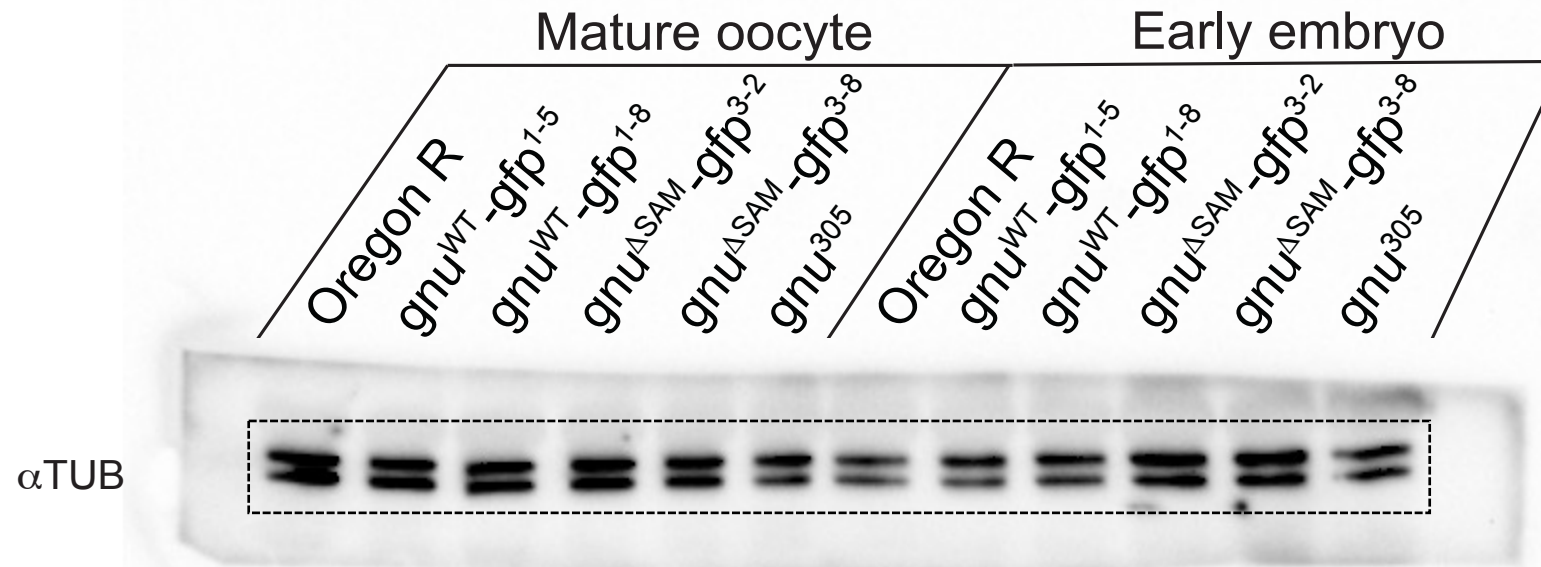

Supplement: supp [file Figure 2D-Source data 1 labeled bands.pdf › Figure 2D_Source data 1/Figure 2D-Source data 1 labeled bands.pdf]

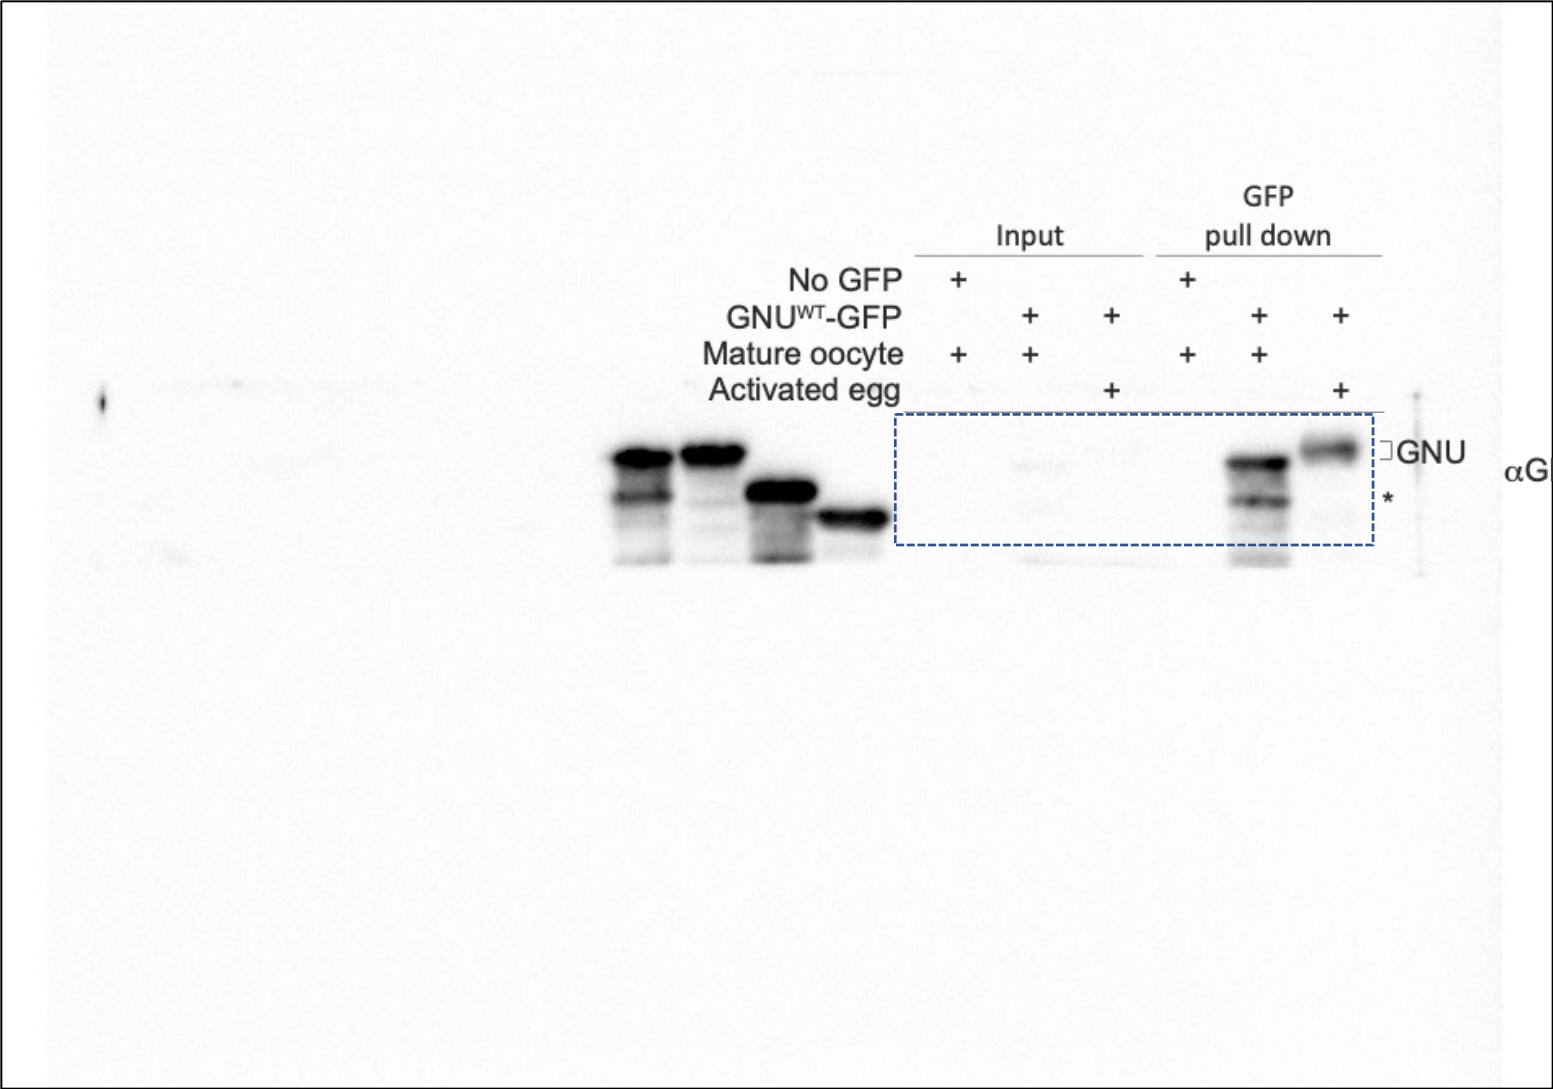

|                        | Input |   |   | GFP<br>pull down |   |   |
|------------------------|-------|---|---|------------------|---|---|
| No GFP                 | +     |   |   | +                |   |   |
| GNU <sup>WT</sup> -GFP |       | + | + |                  | + | + |
| Mature oocyte          | +     | + |   | +                | + |   |
| Activated egg          |       |   | + |                  |   | + |

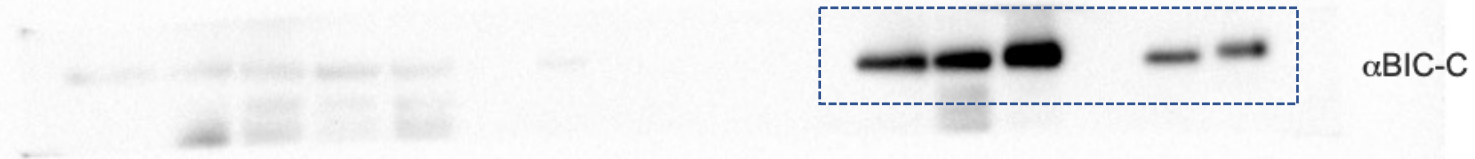

Supplement: supp [file Figure 6A-Source data 1 labeled bands.pdf › Figure 6A_Source data 2/Figure 6A-Source data 1 labeled bands.pdf]

Figure 1–Supplement 1

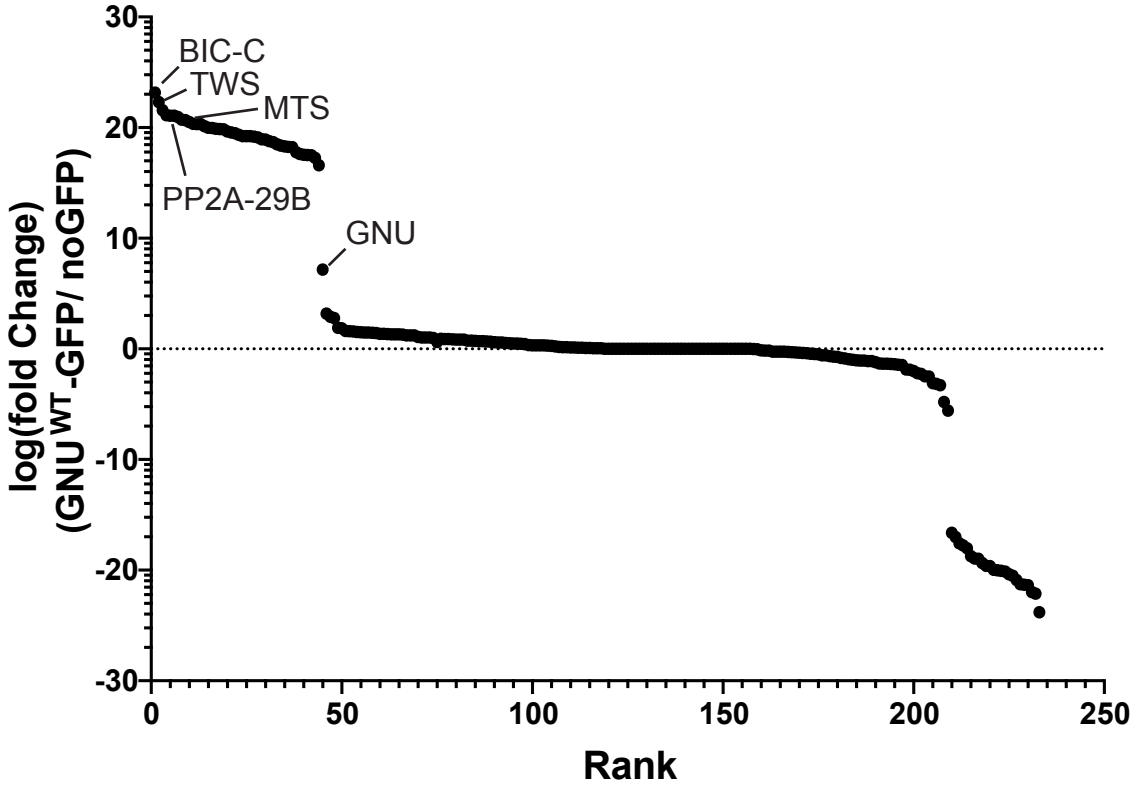

Supplement: supp [file elife_poa_e67294_Figure_1_figure_supplement_1.pdf › elife_poa_e67294_Figure_1_figure_supplement_1.pdf]

Figure 1–Supplement 2

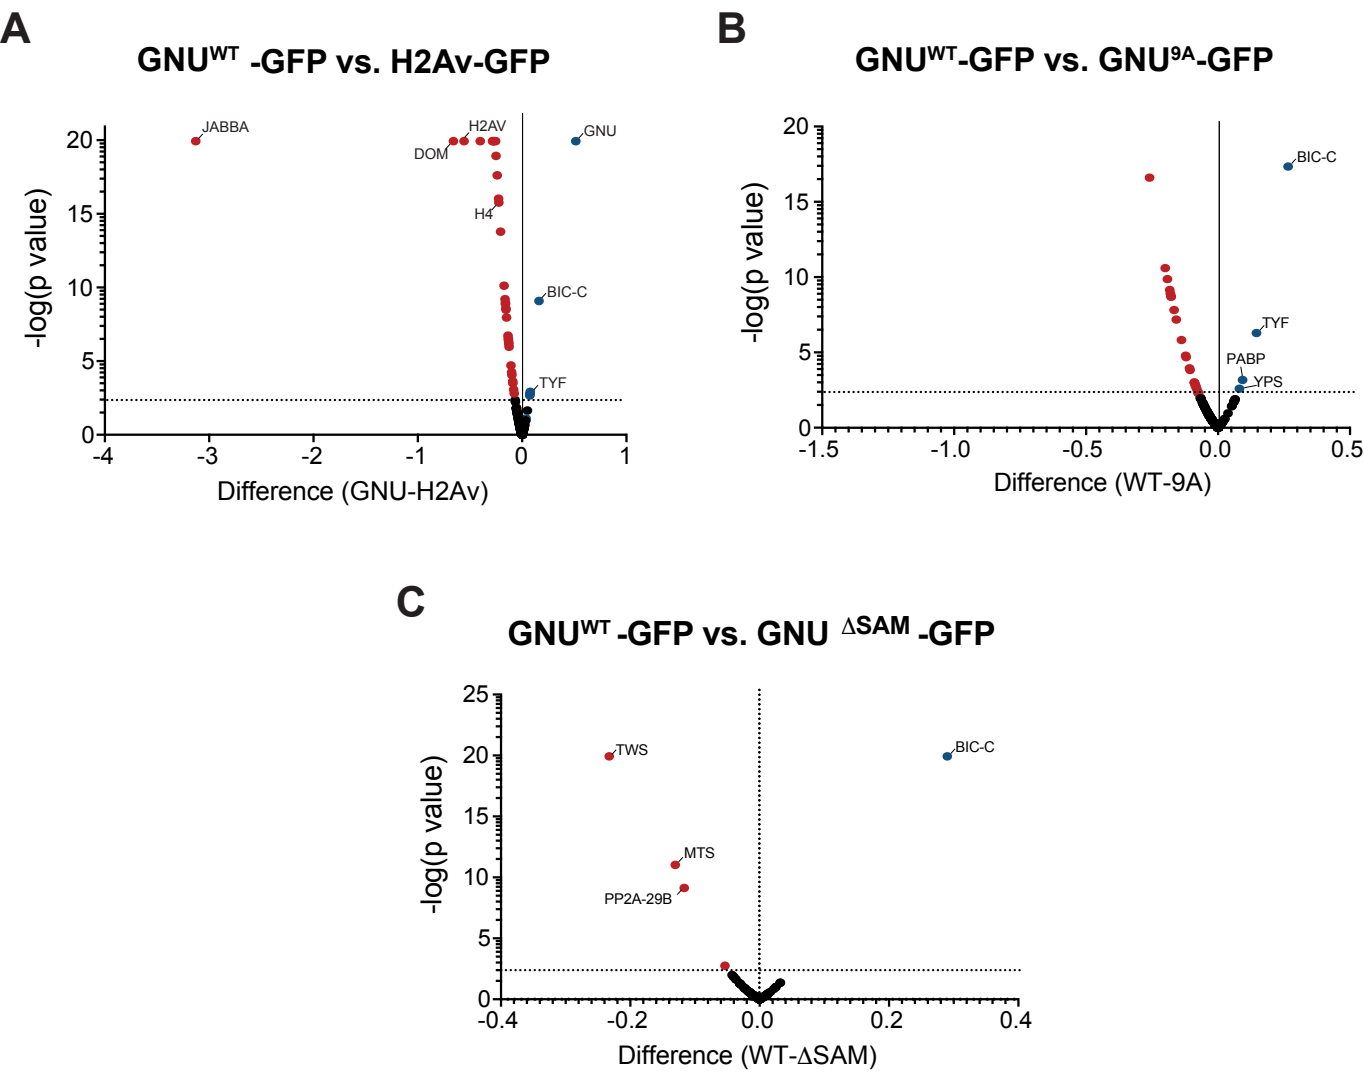

Supplement: supp [file elife_poa_e67294_Figure_1_figure_supplement_2.pdf › elife_poa_e67294_Figure_1_figure_supplement_2.pdf]

Figure 1–Supplement 3

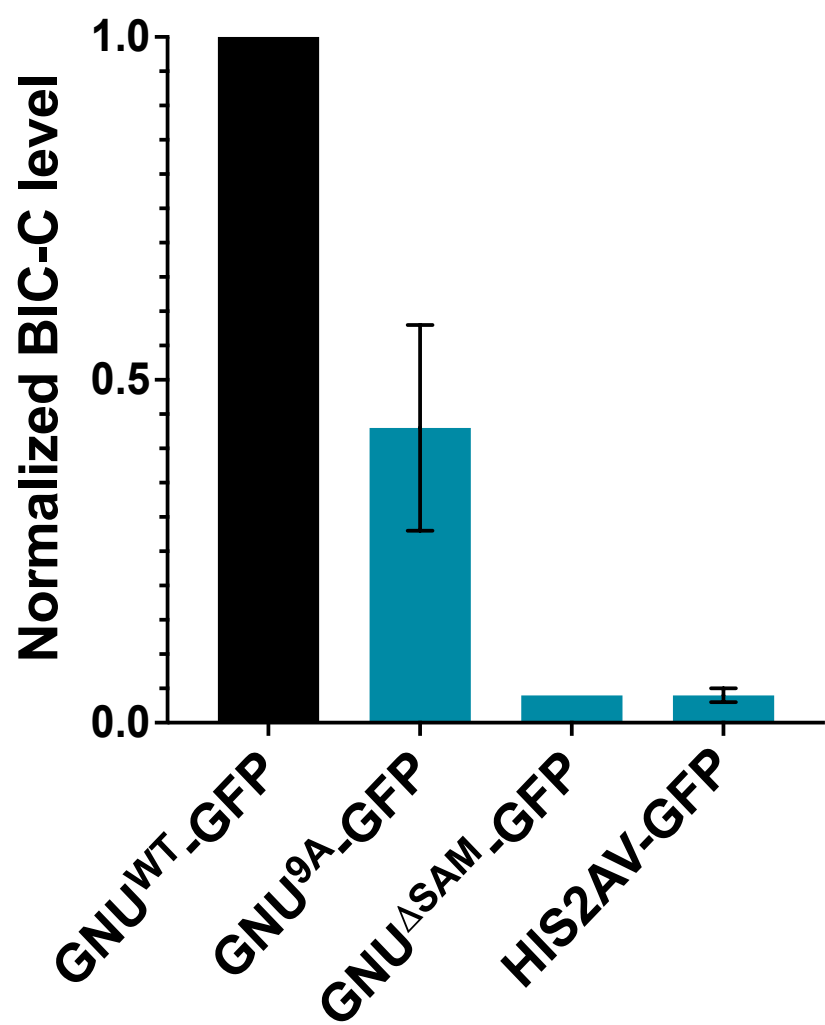

Supplement: supp [file elife_poa_e67294_Figure_1_figure_supplement_3.pdf › elife_poa_e67294_Figure_1_figure_supplement_3.pdf]

Figure 3–Supplement 1

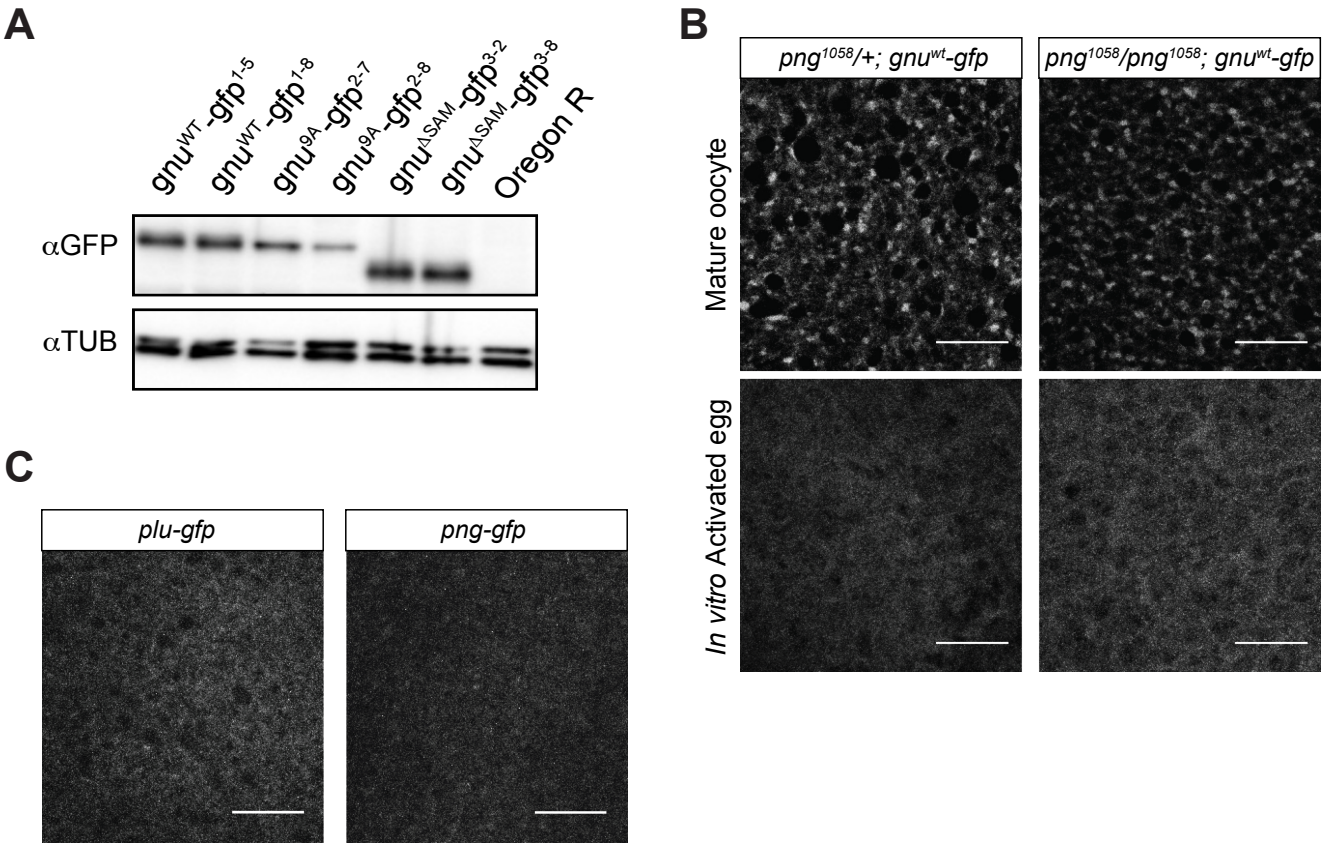

Supplement: supp [file elife_poa_e67294_Figure_3_figure_supplement_1.pdf › elife_poa_e67294_Figure_3_figure_supplement_1.pdf]

Figure 4–Supplement 1

**A**

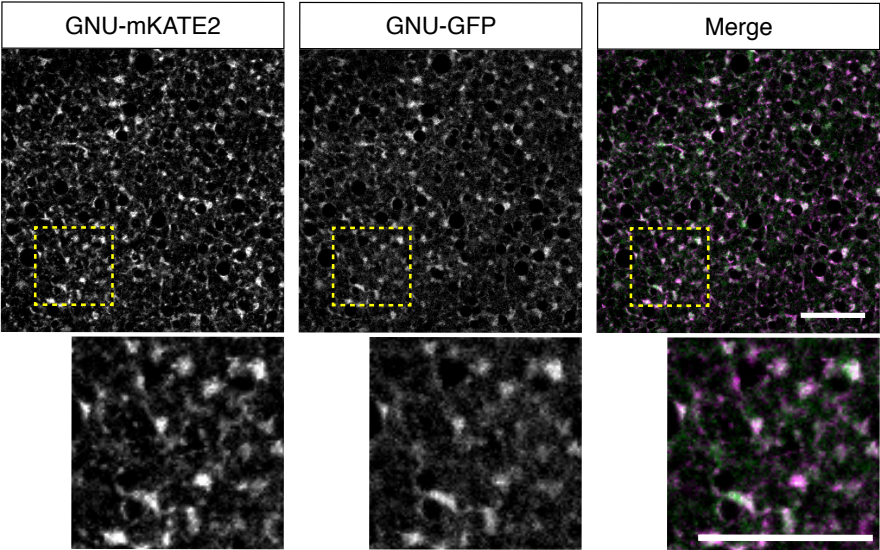

**A'**

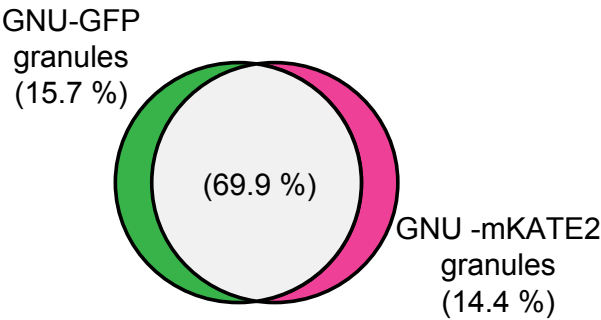

**B**

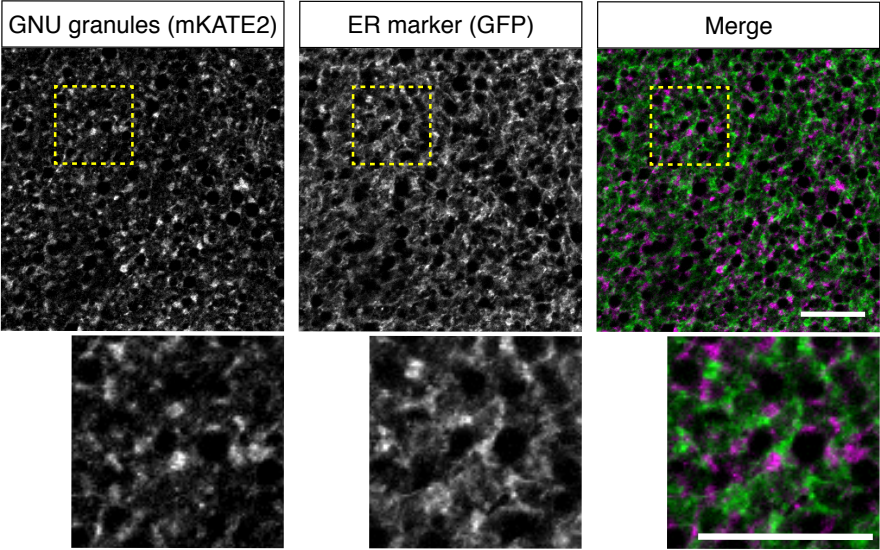

**B'**

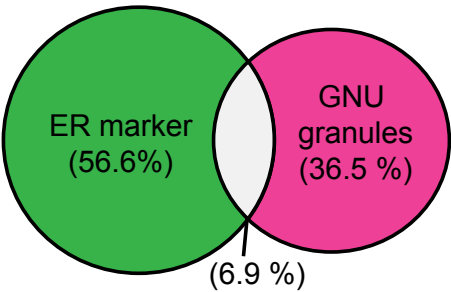

Supplement: supp [file elife_poa_e67294_Figure_4_figure_supplement_1.pdf › elife_poa_e67294_Figure_4_figure_supplement_1.pdf]

Figure 5–Supplement 1

**A**

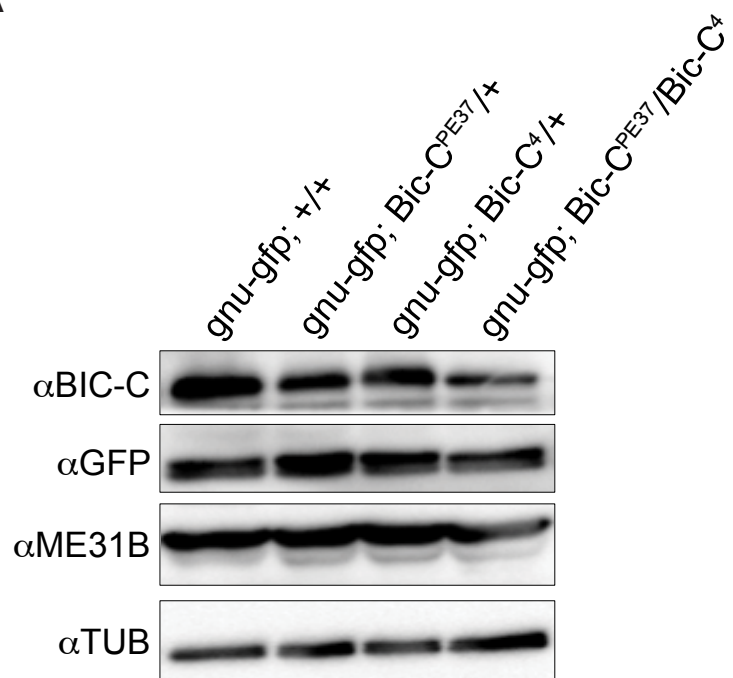

**B**

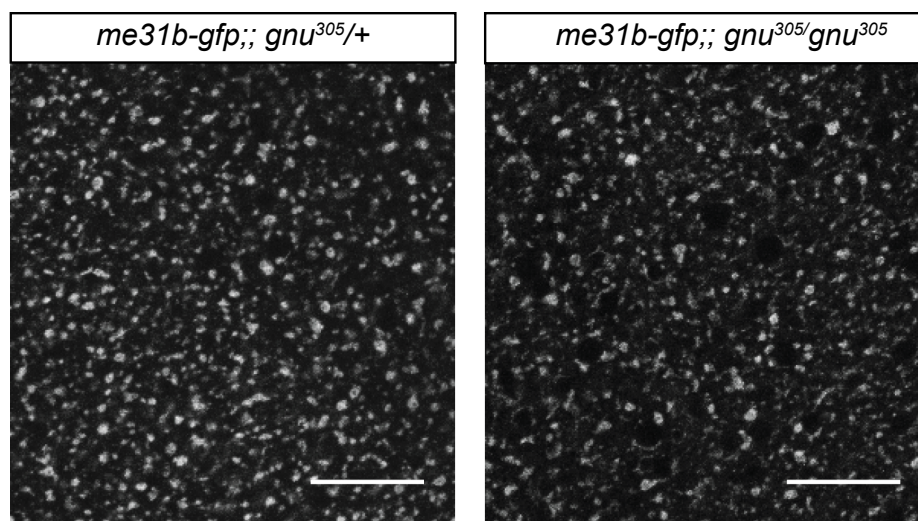

Supplement: supp [file elife_poa_e67294_Figure_5_figure_supplement_1.pdf › elife_poa_e67294_Figure_5_figure_supplement_1.pdf]
